# Supplementary material for: Bi-Blatter diradicals: conformation and substituent dependent high-spin materials
Source: Royal Society of Chemistry journal article supplement (doi:10.1039/d4qm00587b), 2024-01-01
Supplement: d4qm00587b1.pdf [file d4qm00587b1.pdf]

## Electronic Supplementary Information

For

### Bi-Blatter diradicals: Conformation and substituent dependent high-spin materials

Dominika Pomikło,<sup>a</sup> Patrycja Szamweber,<sup>a</sup> Anna Pietrzak,<sup>b</sup> and Piotr Kaszyński\*<sup>a,c,d</sup>

<sup>a</sup> Centre of Molecular and Macromolecular Studies, Polish Academy of Sciences, 90-363 Łódź, Poland

<sup>b</sup> Faculty of Chemistry, Łódź University of Technology, 90-924 Łódź, Poland

<sup>c</sup> Faculty of Chemistry, University of Łódź, 91-403 Łódź, Poland

<sup>d</sup> Department of Chemistry, Middle Tennessee State University, Murfreesboro, TN 37130, USA

| <b>Table of contents</b>                            | <b>Page</b> |
|-----------------------------------------------------|-------------|
| 1. NMR spectra                                      | .....S2     |
| 2. IR spectra                                       | ..... S16   |
| 3. XRD data collection and refinement               | ..... S17   |
| 4. Electronic absorption spectroscopy               | ..... S21   |
| 5. Electrochemical results                          | ..... S23   |
| 6. Details of VT EPR spectroscopy and data analysis | ..... S24   |
| a) sample preparation                               | ..... S24   |
| b) measurement                                      | ..... S25   |
| c) spectra analysis and simulation                  | ..... S27   |
| 7. Computational details                            | ..... S32   |
| a) geometry optimization                            | ..... S32   |
| b) intramolecular spin-spin exchange interactions   | ..... S35   |
| c) ratio of conformers                              | ..... S38   |
| d) activation energy for conformer interconversion  | ..... S39   |
| e) spin concentration in model monoradicals         | ..... S40   |
| f) electronic excitations                           | ..... S41   |
| g) partial output data for TD-DFT calculations      | ..... S43   |
| 8. Archive for DFT calculations                     | ..... S53   |
| 9. References                                       | ..... S100  |

# 1. NMR spectra

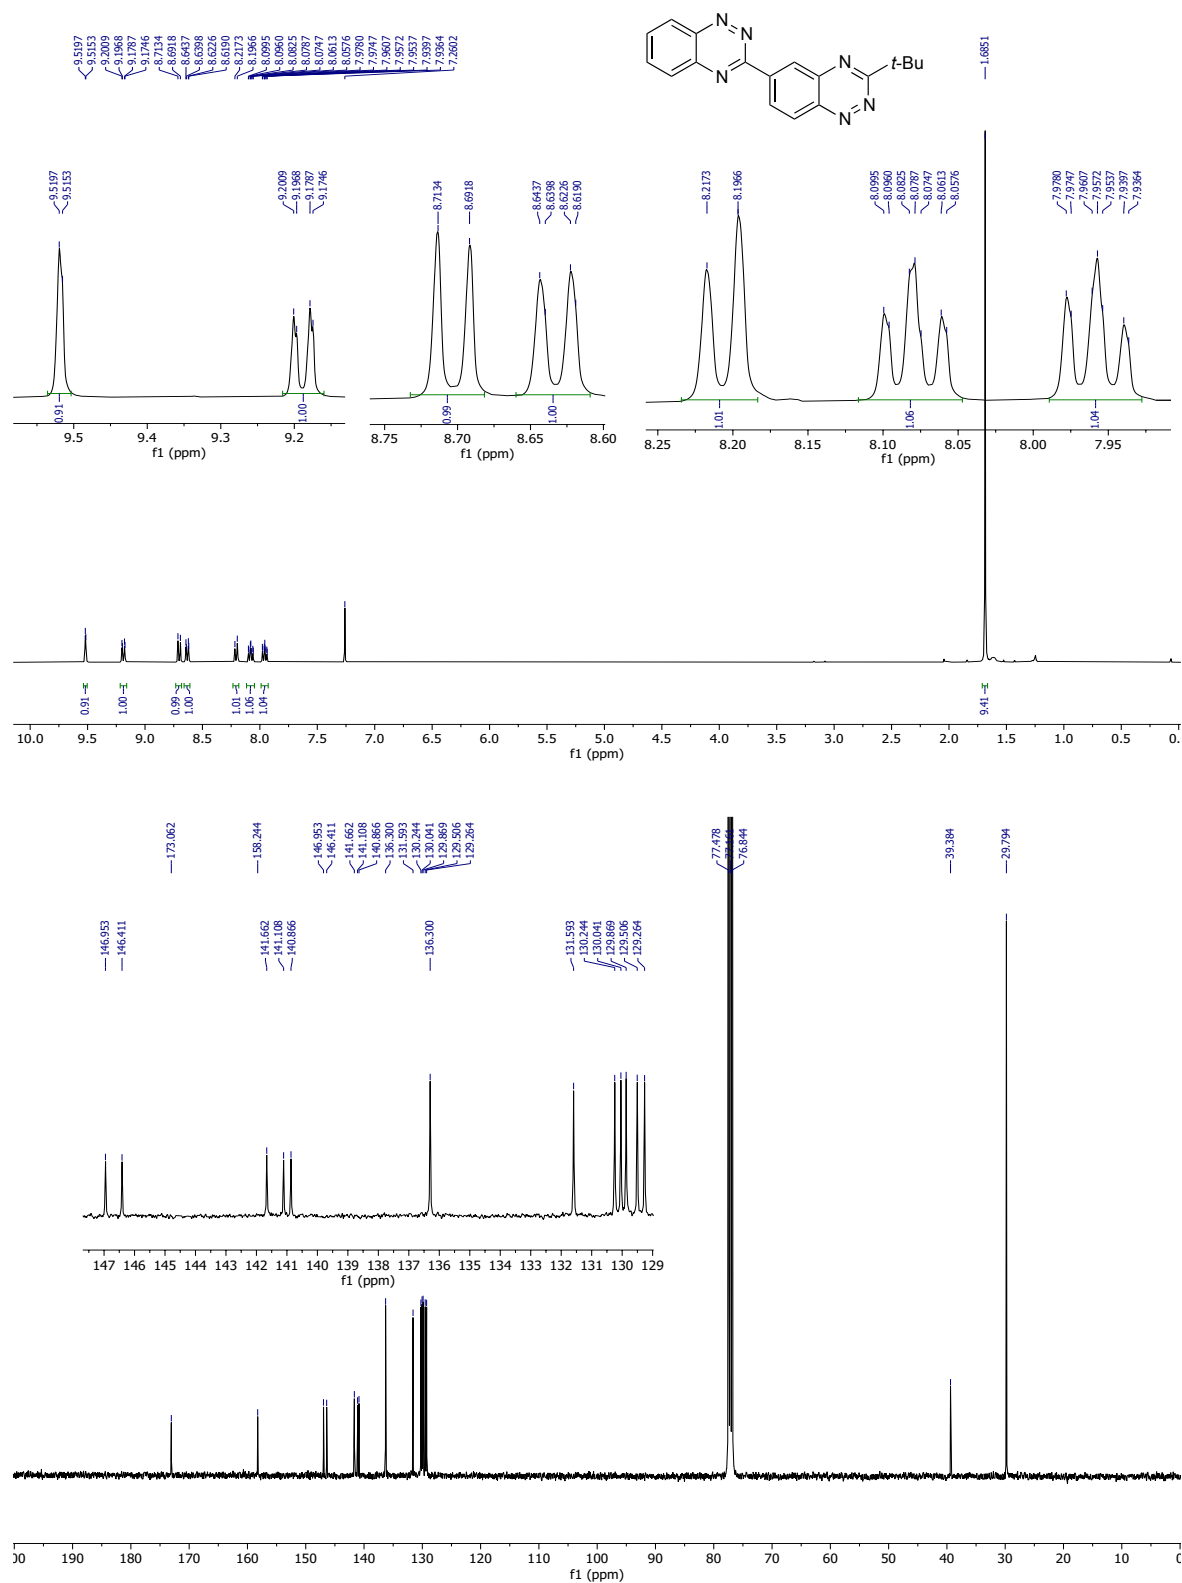

Figure S1. <sup>1</sup>H NMR (400 MHz) and <sup>13</sup>C{<sup>1</sup>H} NMR (100 MHz) spectra of 3[3,6] (CDCl<sub>3</sub>).

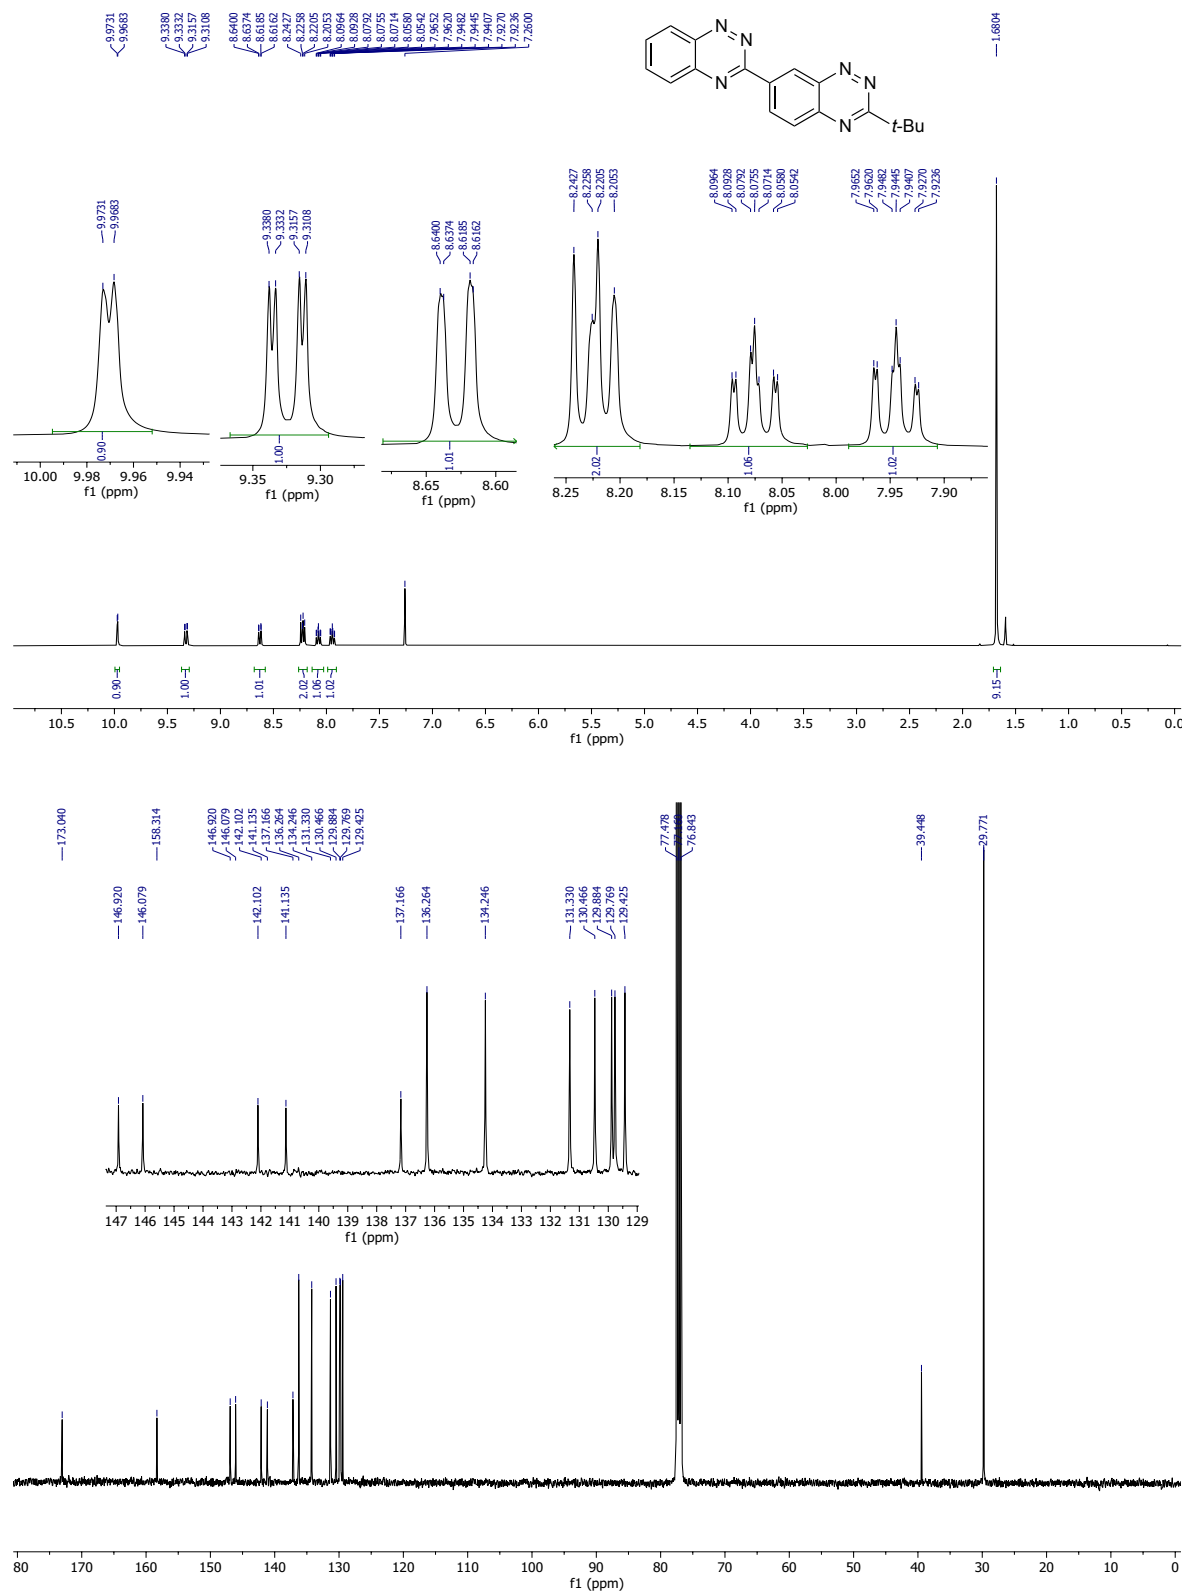

**Figure S2.**  $^1\text{H}$  NMR (400 MHz) and  $^{13}\text{C}\{^1\text{H}\}$  NMR (100 MHz) spectra of **3[3,7]** ( $\text{CDCl}_3$ ).

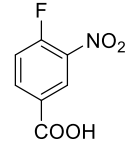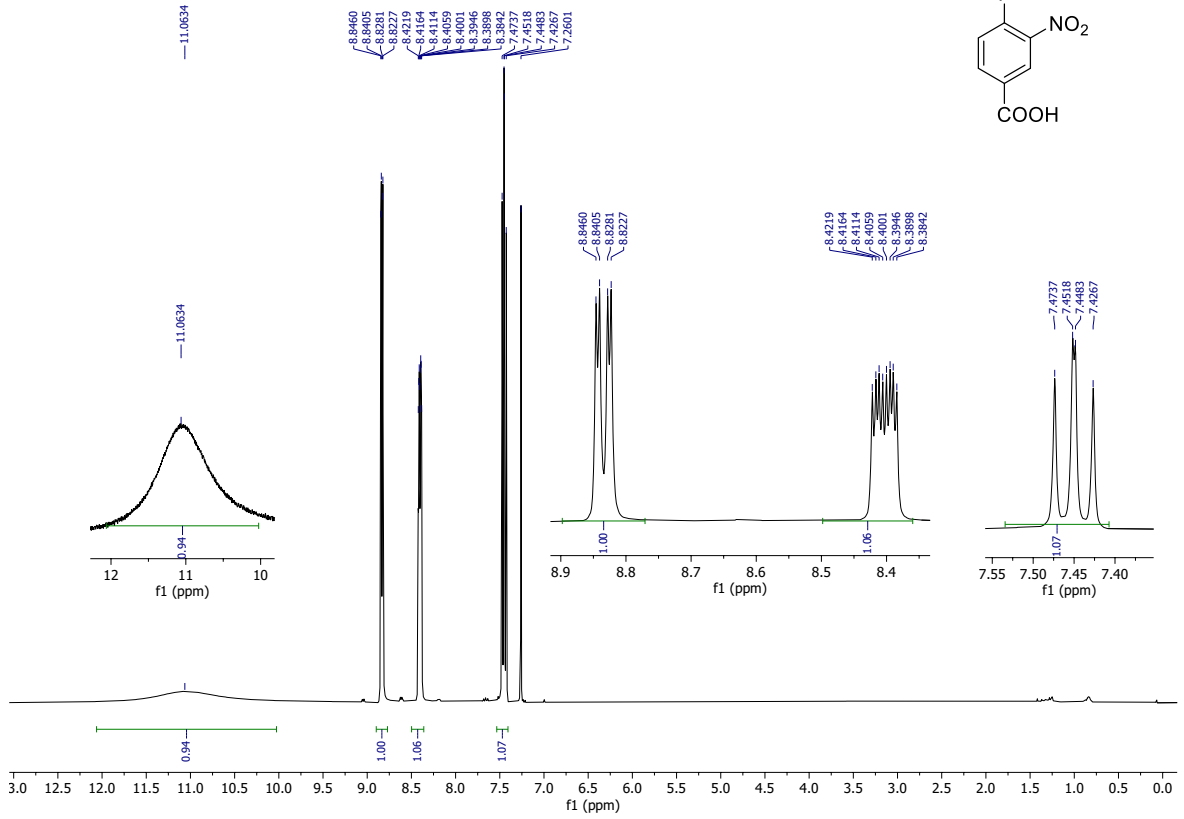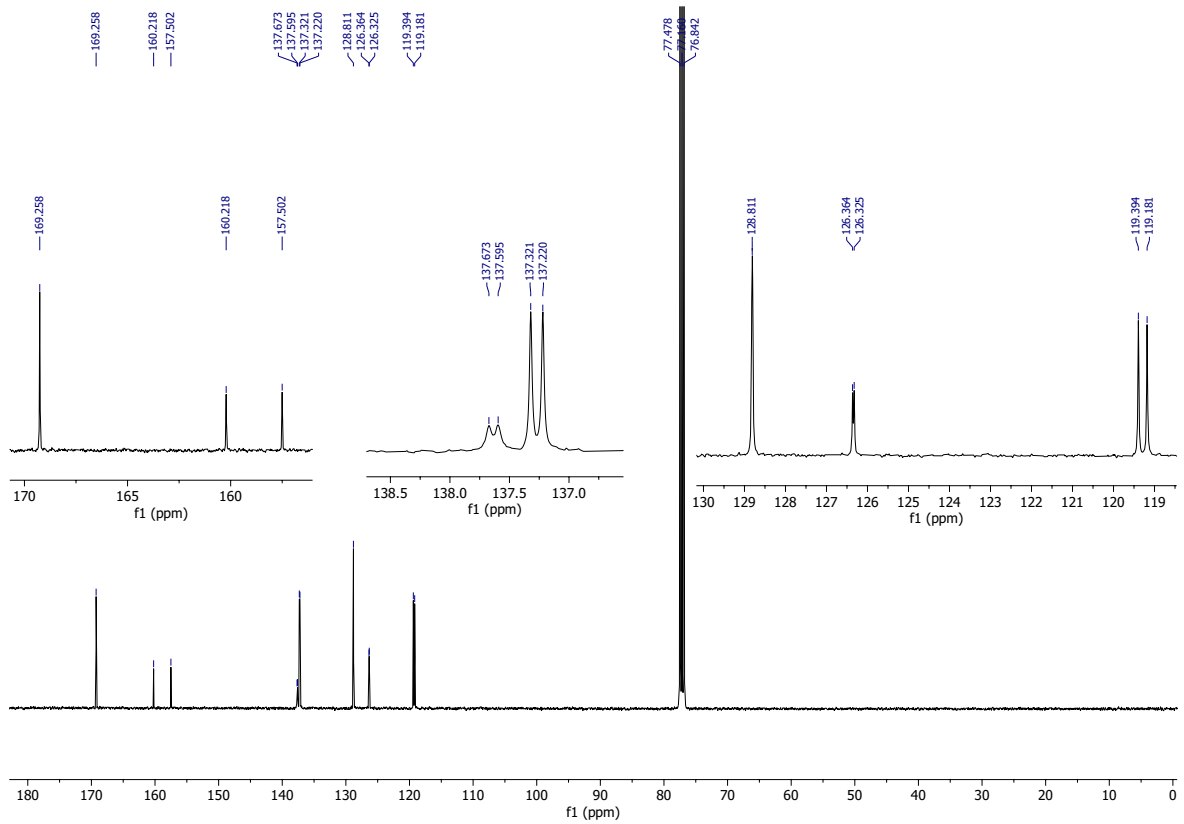



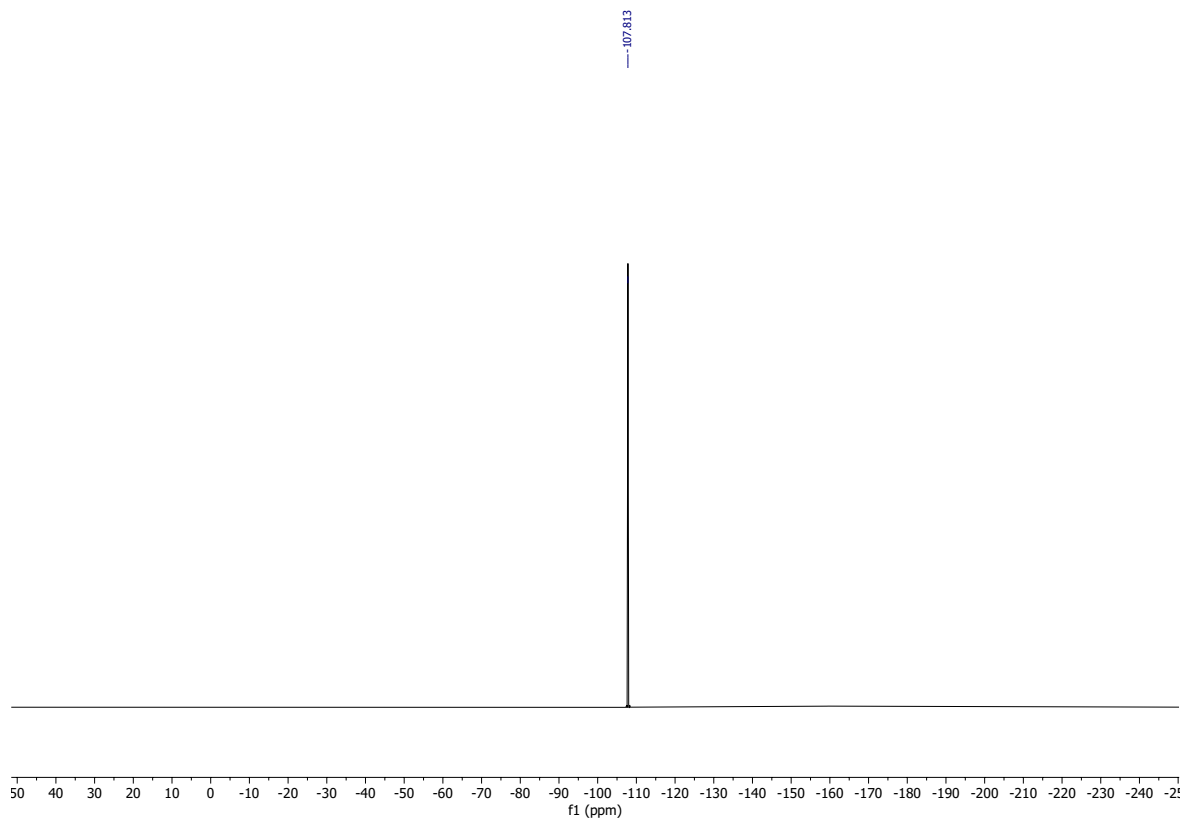

**Figure S3.**  $^1\text{H}$  NMR (400 MHz),  $^{13}\text{C}\{^1\text{H}\}$  NMR (100 MHz) AND  $^{19}\text{F}$  NMR (377 MHz) spectra of **4[6]** ( $\text{CDCl}_3$ ).

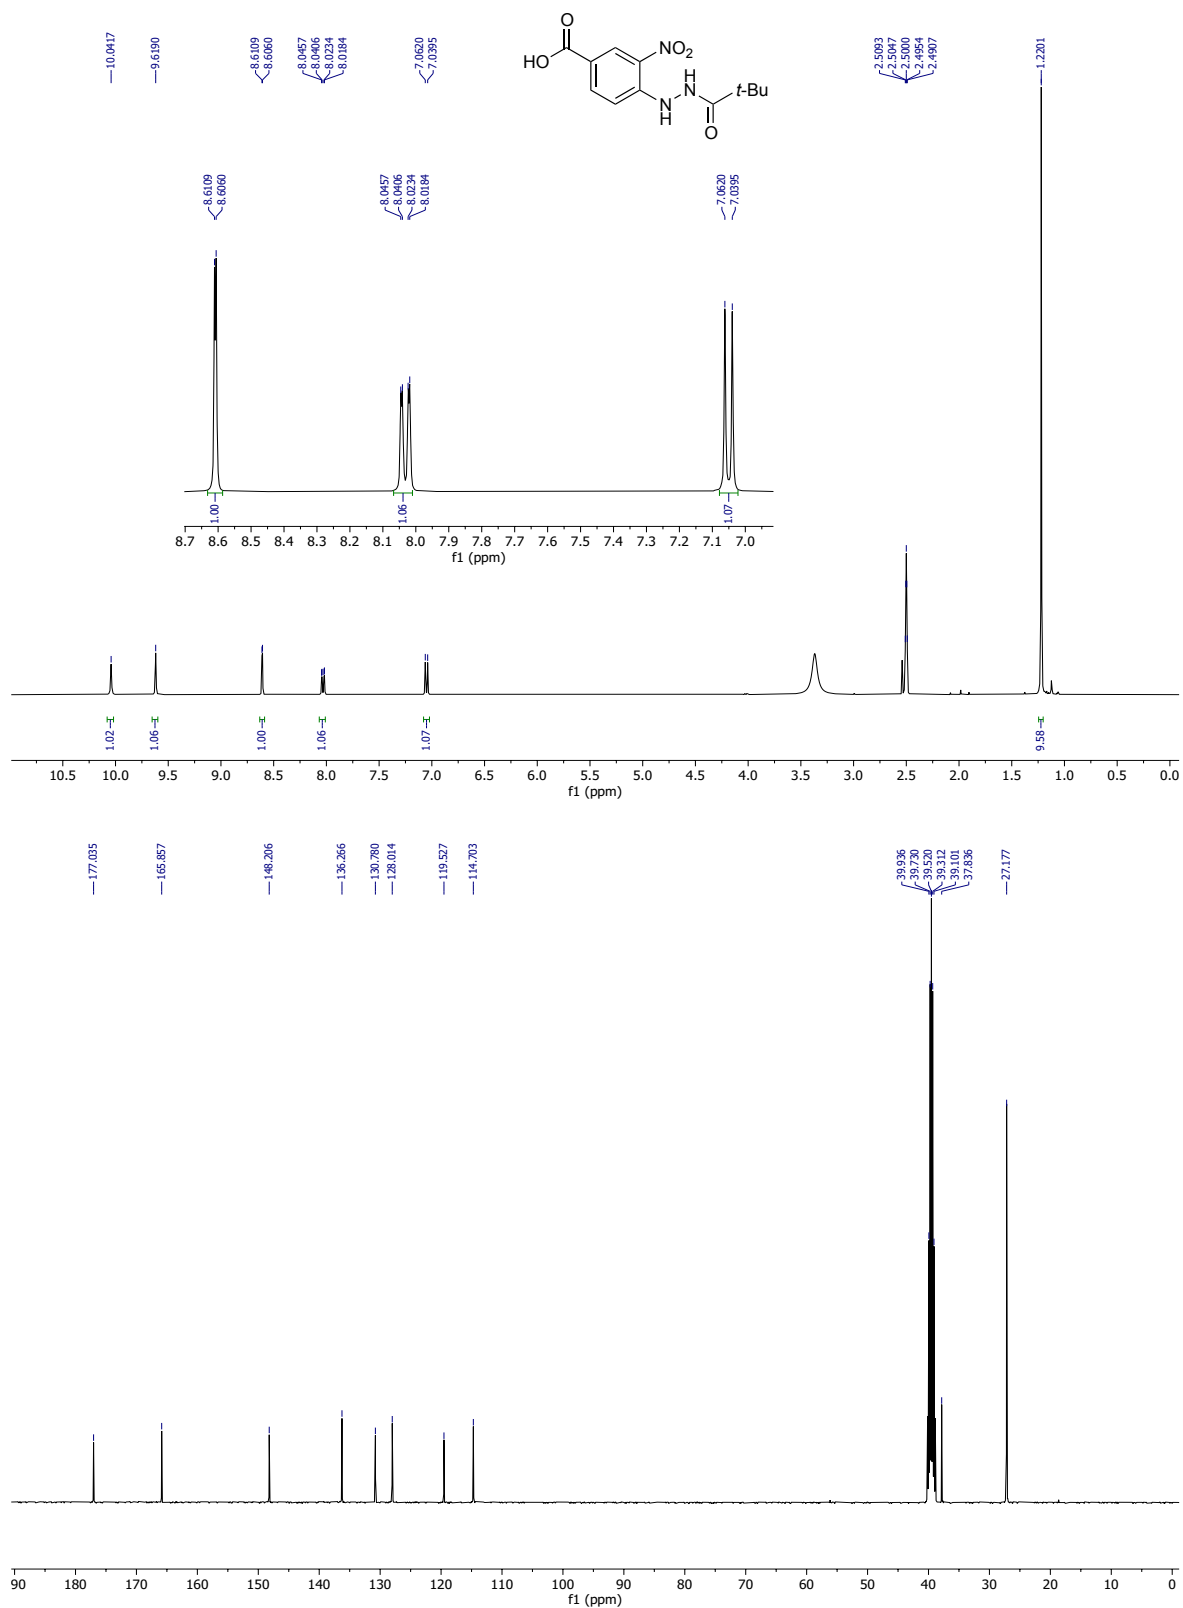

**Figure S4.** <sup>1</sup>H NMR (400 MHz) and <sup>13</sup>C{<sup>1</sup>H} NMR (100 MHz) spectra of 5[6] (DMSO-*d*<sub>6</sub>).

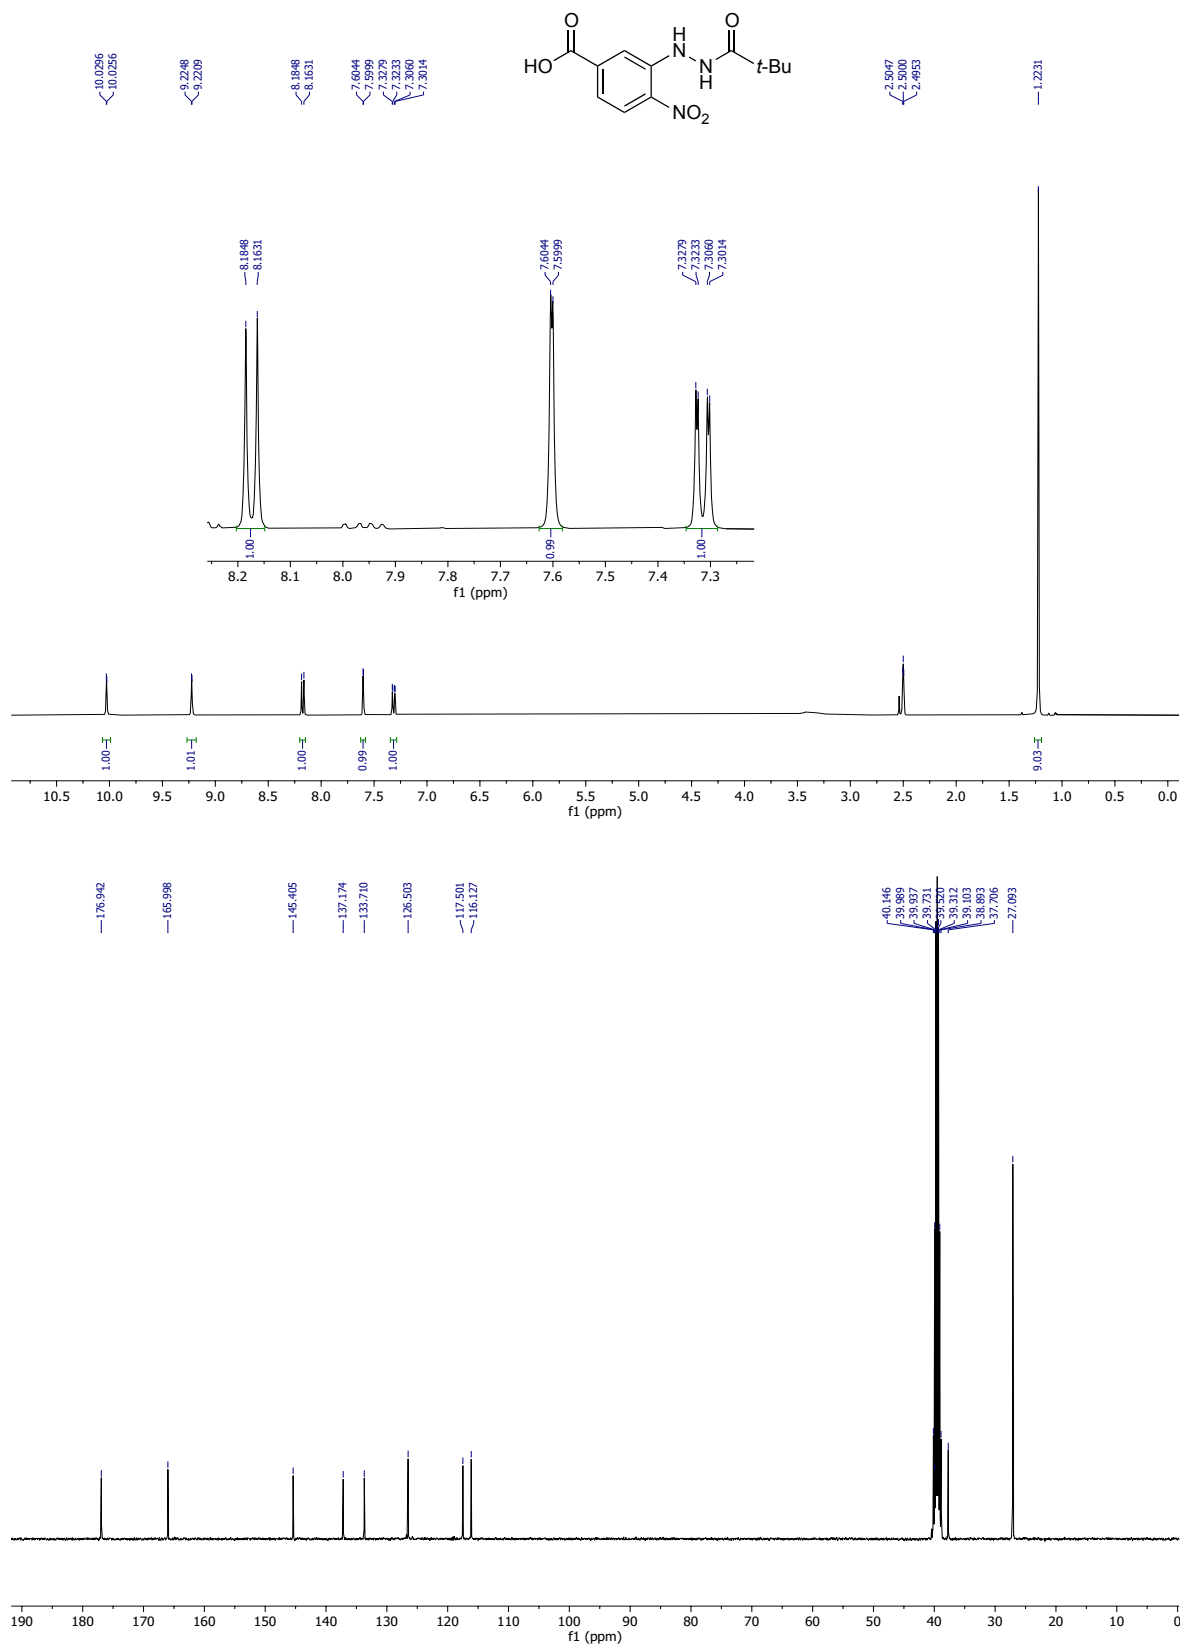

**Figure S5.**  $^1\text{H}$  NMR (400 MHz) and  $^{13}\text{C}\{^1\text{H}\}$  NMR (100 MHz) spectra of **5[7]** ( $\text{DMSO-}d_6$ ).

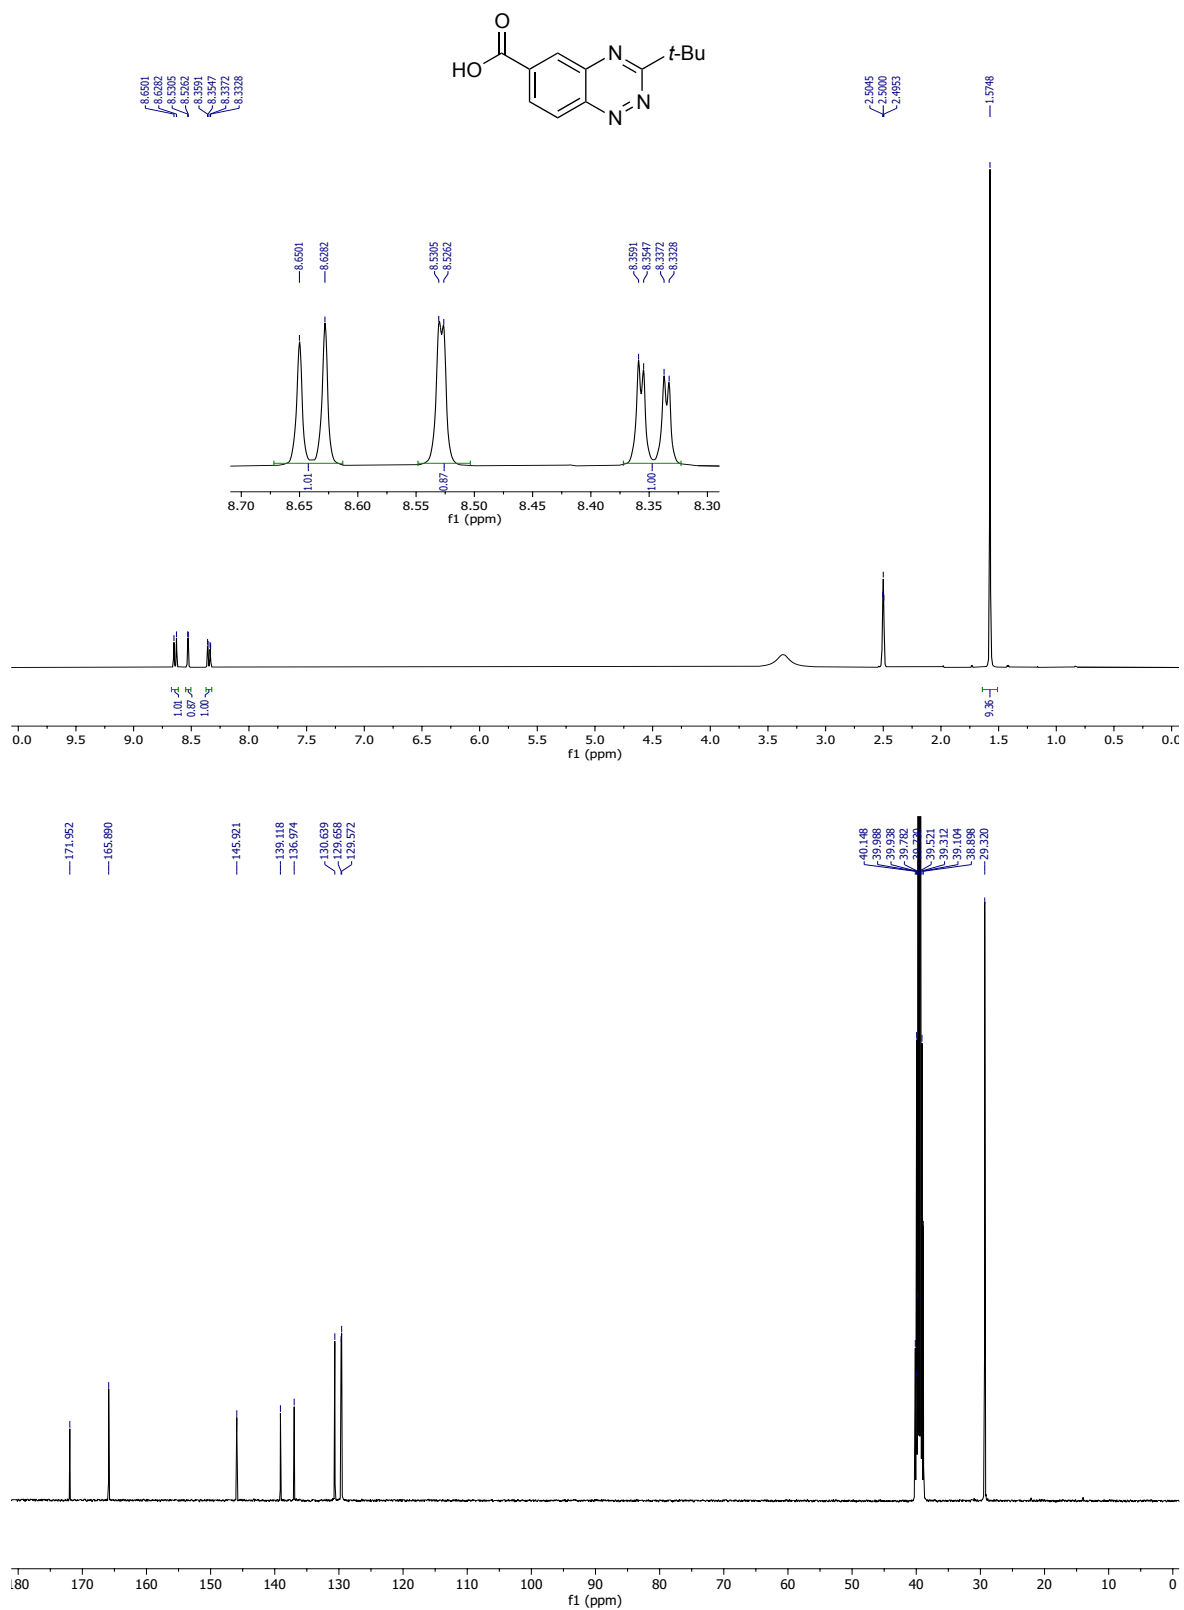

**Figure S6.** <sup>1</sup>H NMR (400 MHz) and <sup>13</sup>C{<sup>1</sup>H} NMR (100 MHz) spectra of **6[6]** (DMSO-*d*<sub>6</sub>).

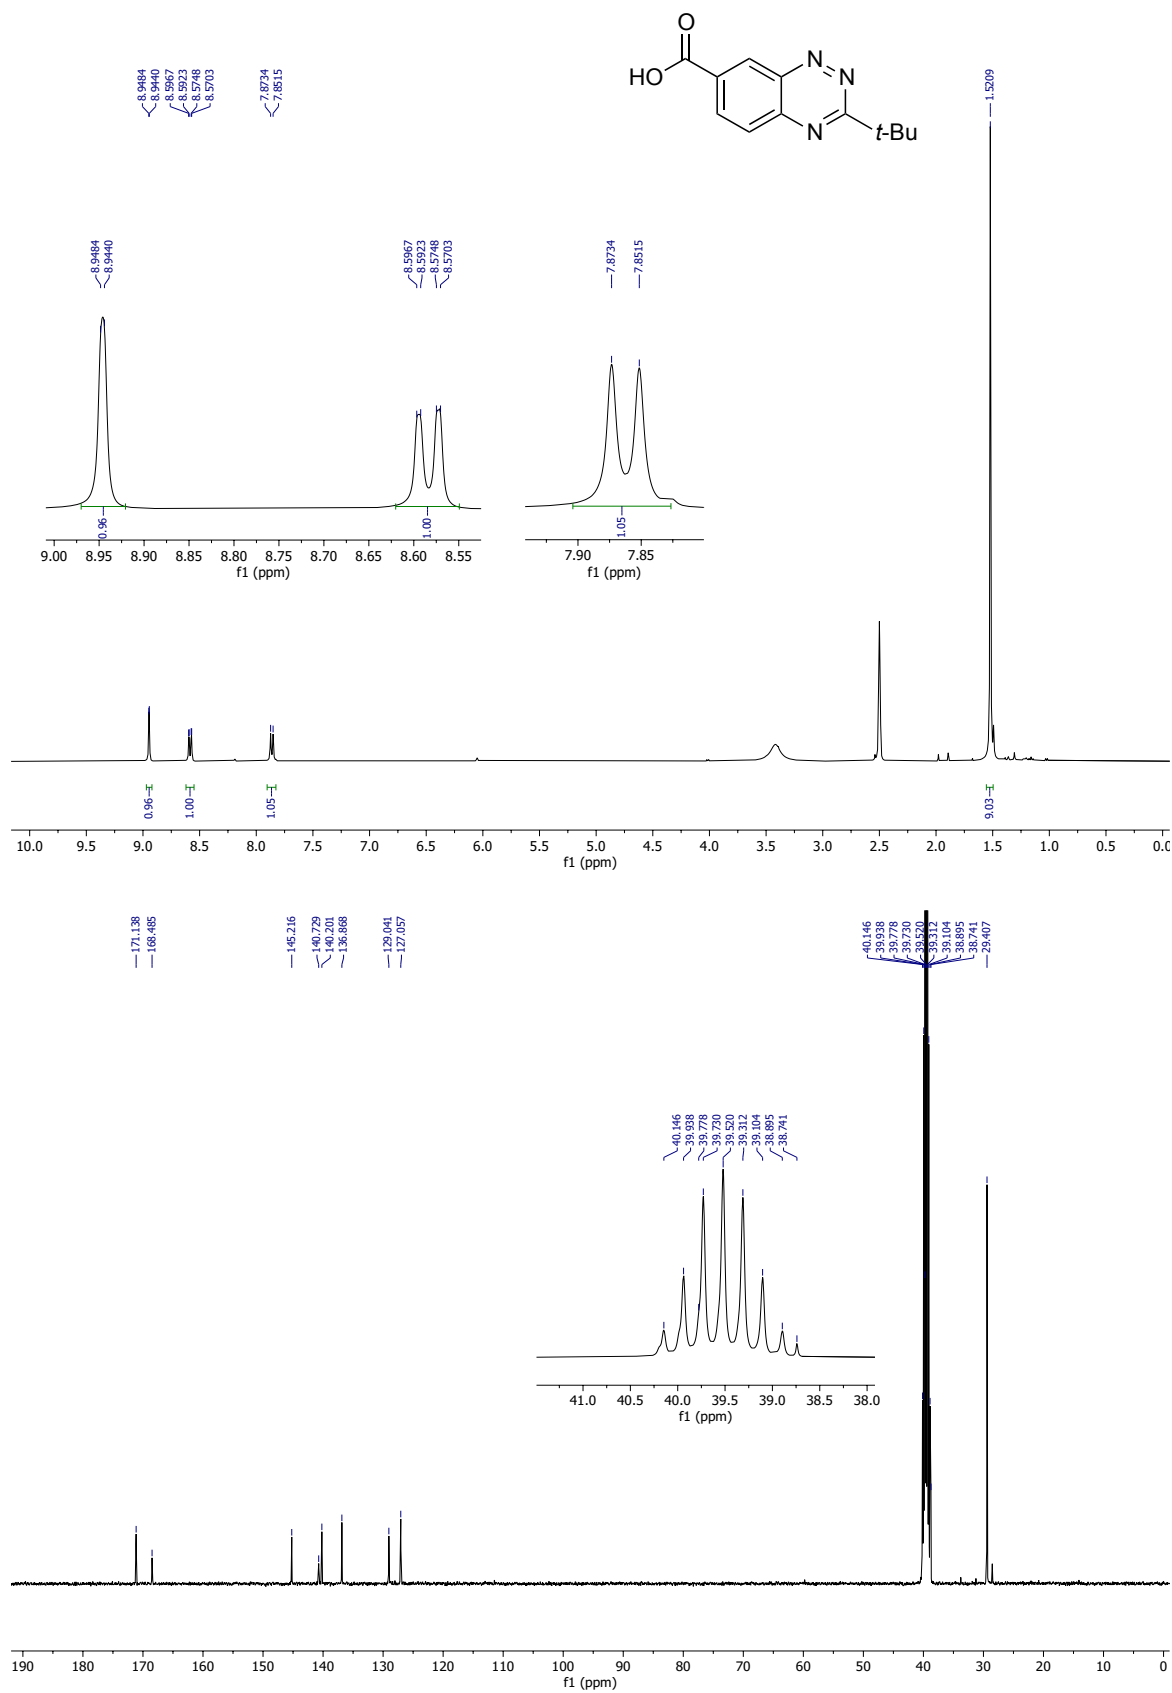

**Figure S7.** <sup>1</sup>H NMR (400 MHz) and <sup>13</sup>C{<sup>1</sup>H} NMR (100 MHz) spectra of **6[7]** (DMSO-*d*<sub>6</sub>).

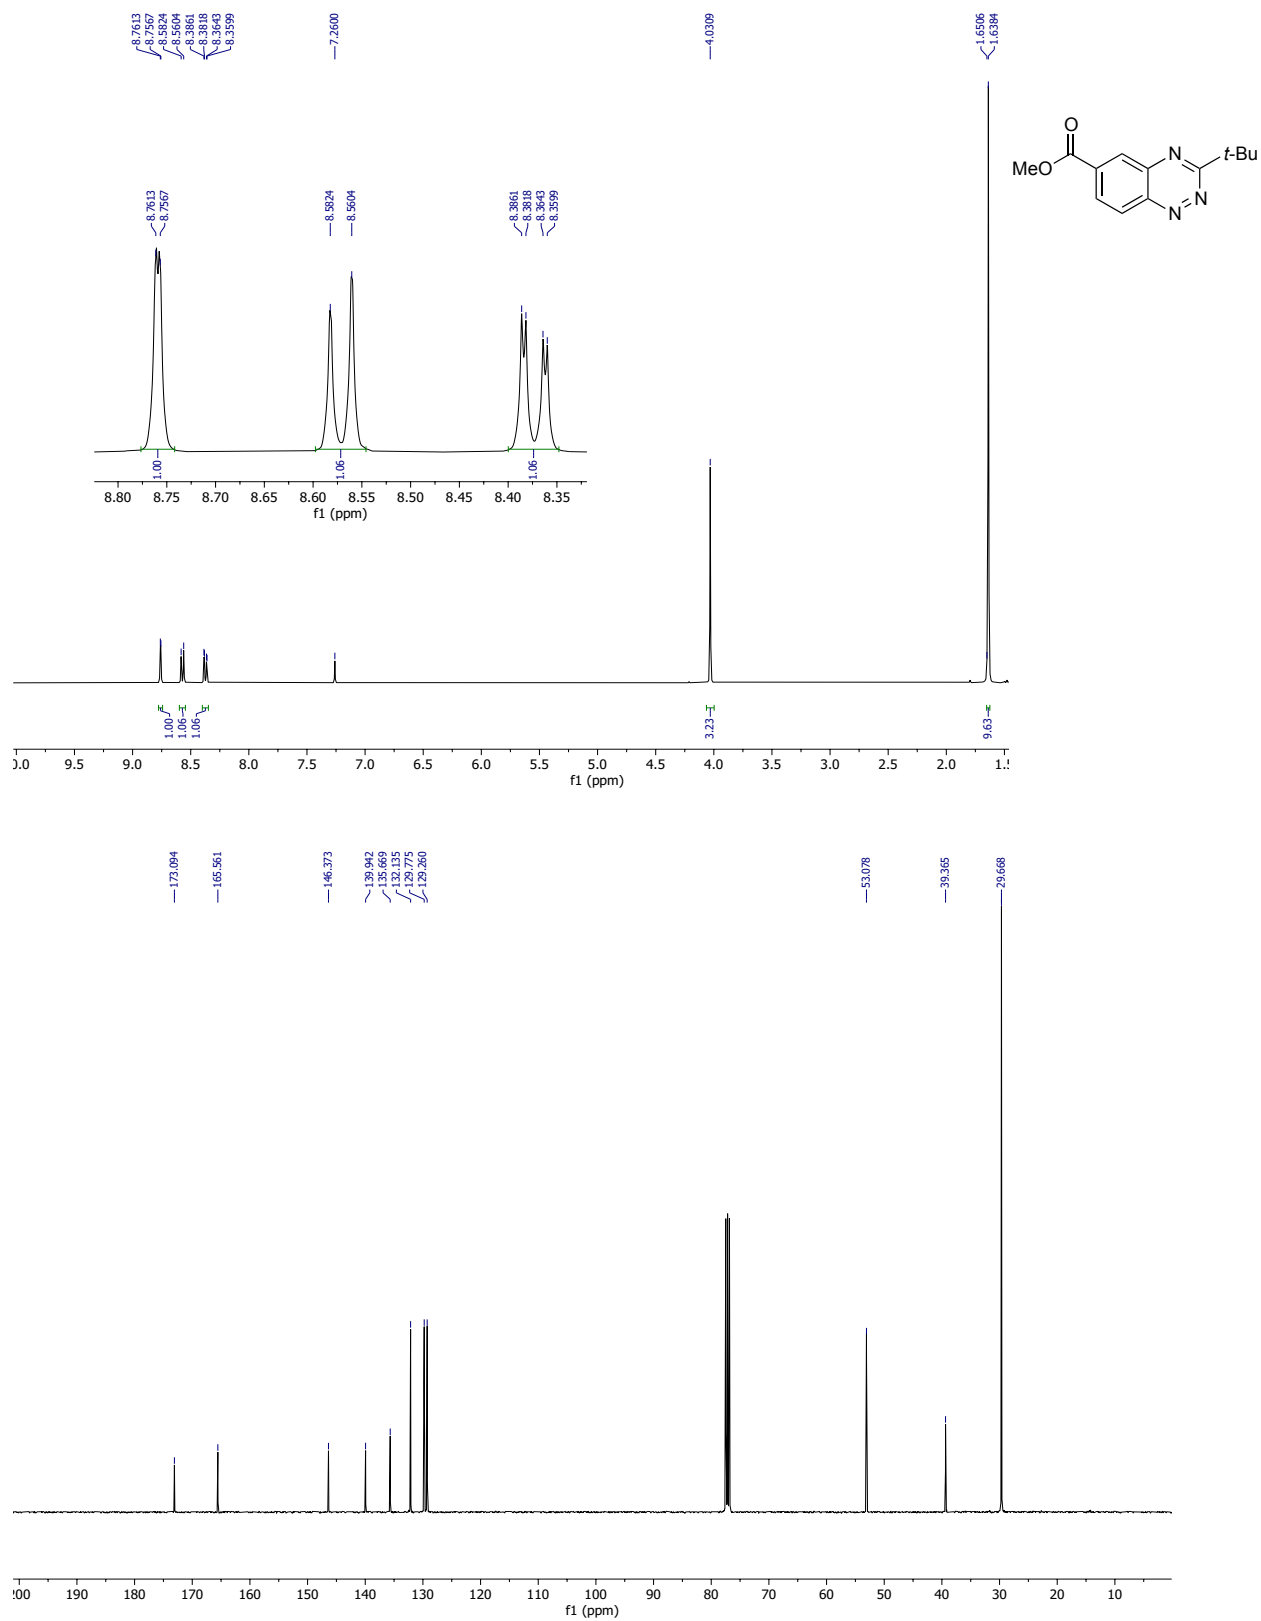

**Figure S8.** <sup>1</sup>H NMR (400 MHz) and <sup>13</sup>C{<sup>1</sup>H} NMR (100 MHz) spectra of 7[6] (CDCl<sub>3</sub>).

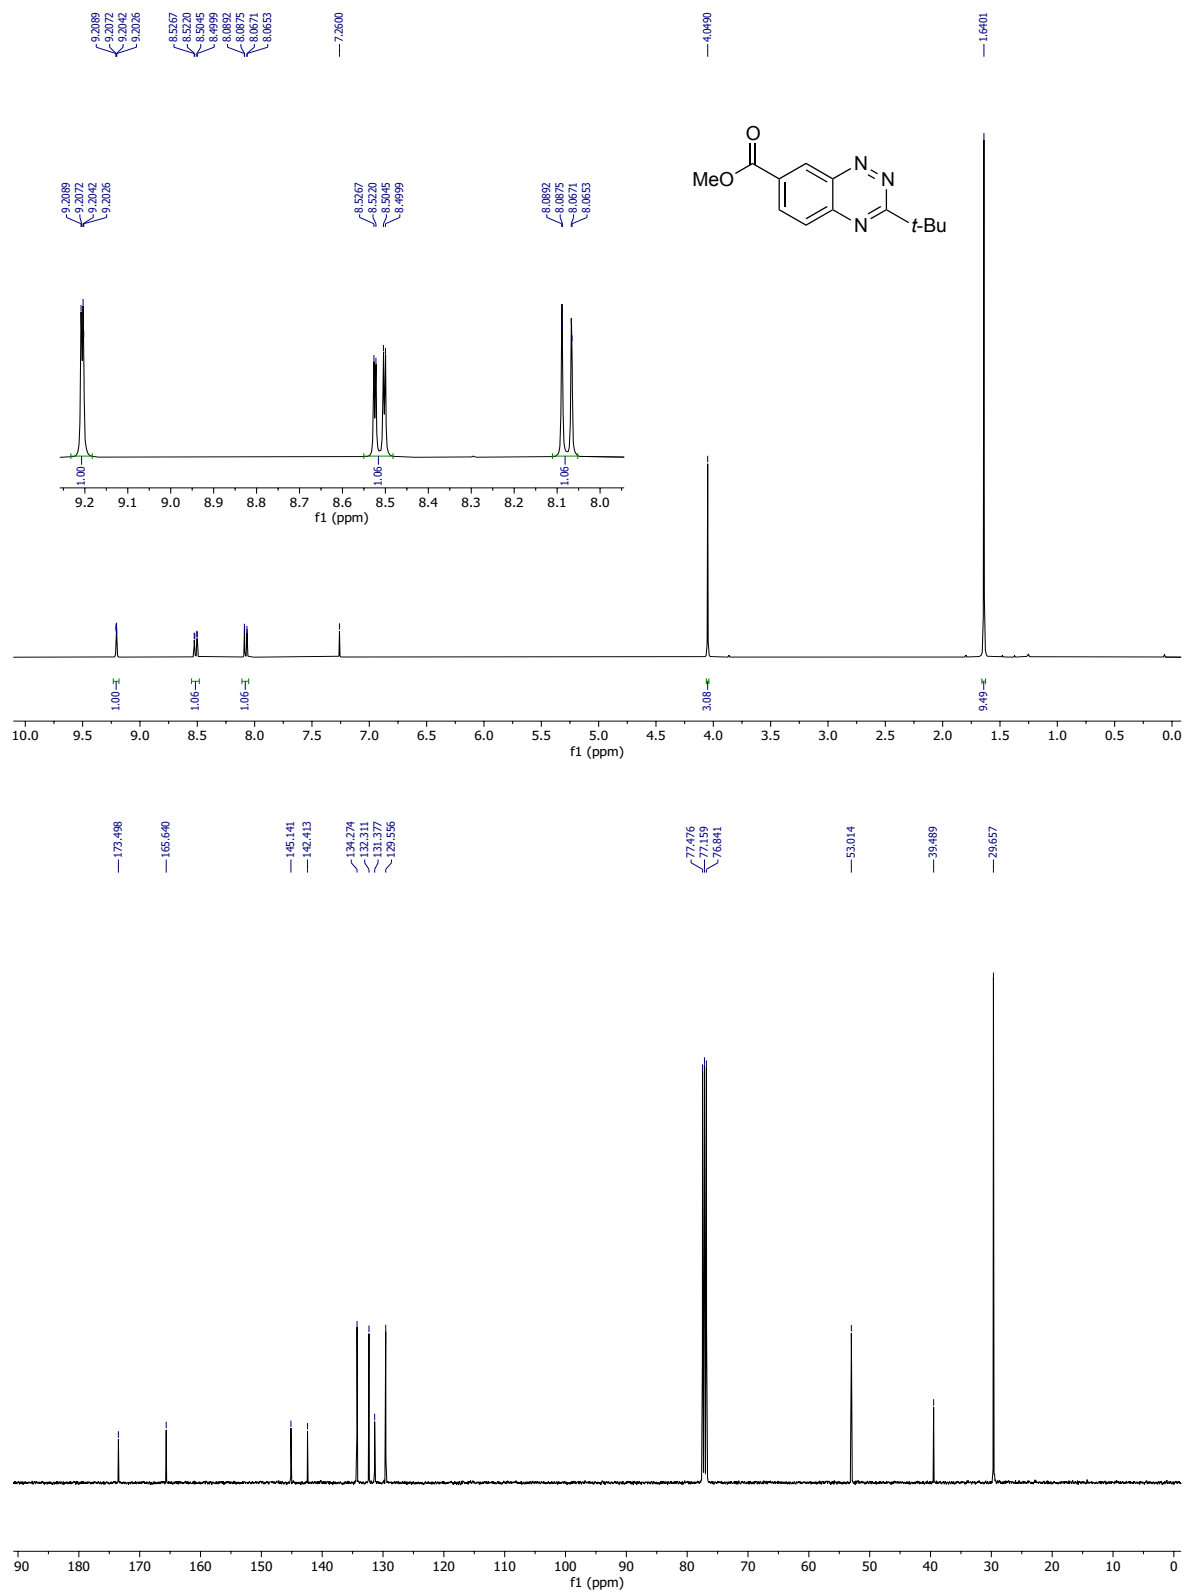

Figure S9. <sup>1</sup>H NMR (400 MHz) and <sup>13</sup>C{<sup>1</sup>H} NMR (100 MHz) spectra of 7[7] (CDCl<sub>3</sub>).

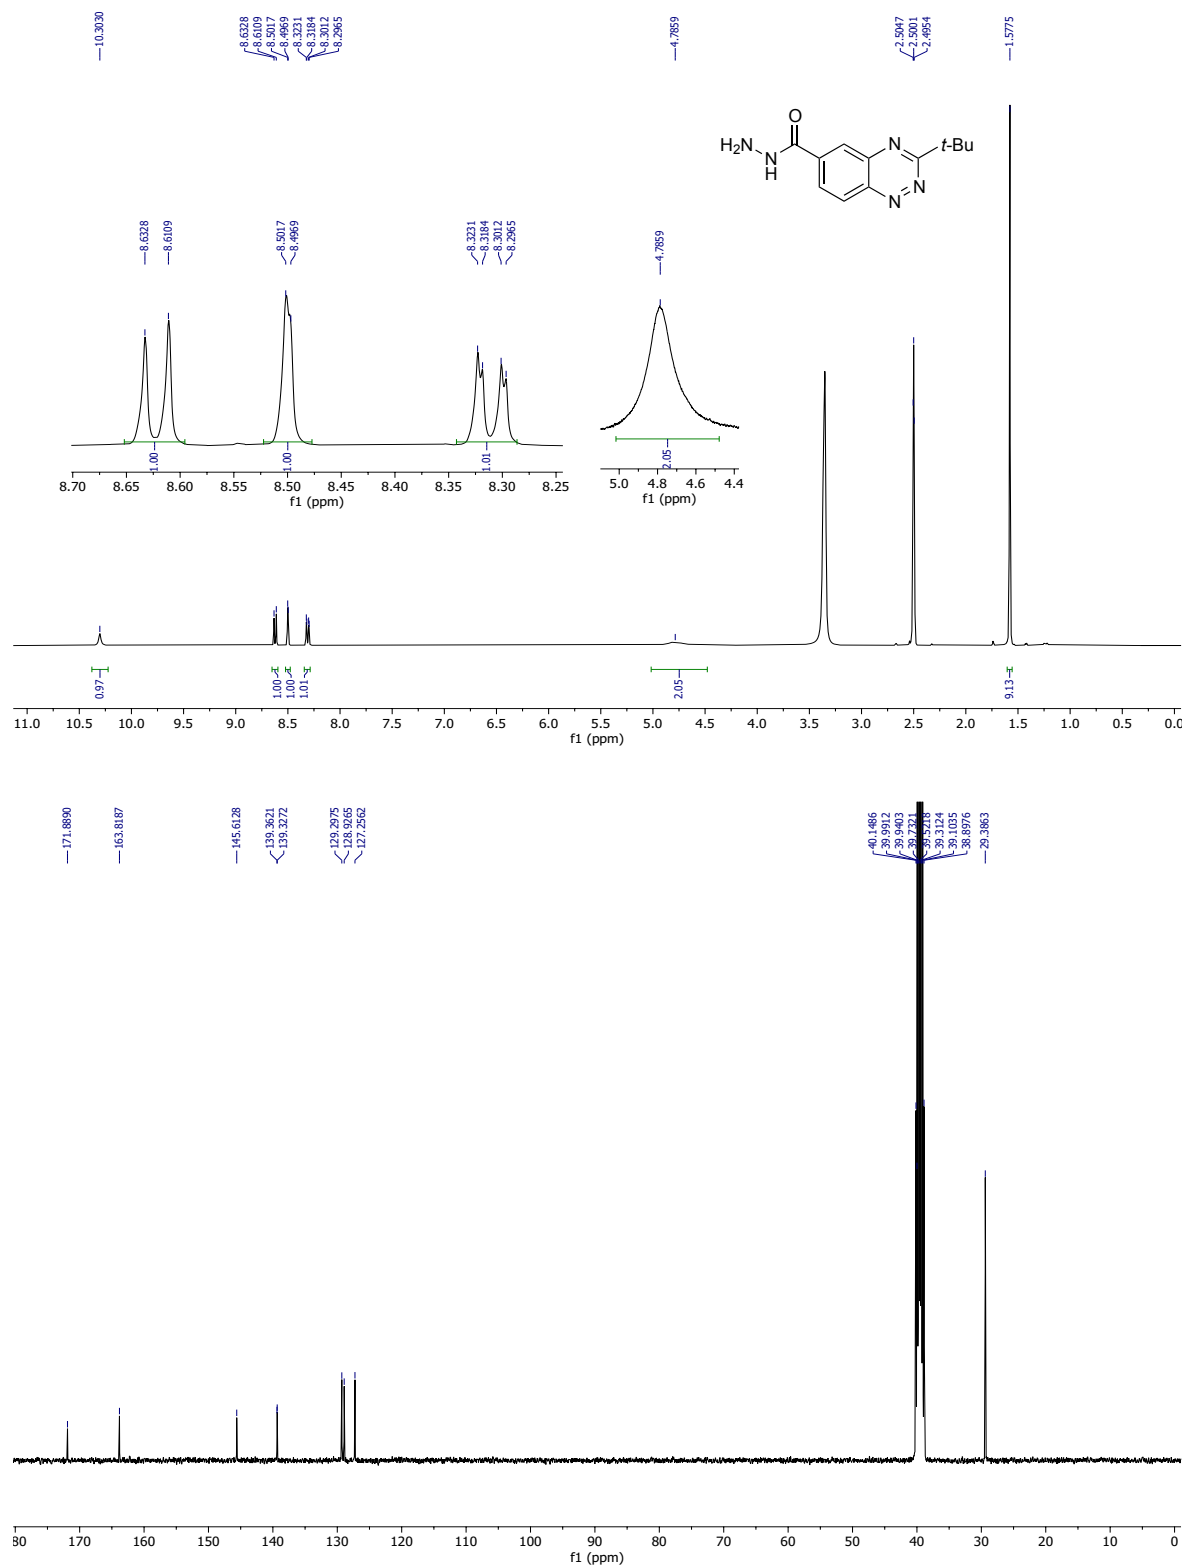

**Figure S10.** <sup>1</sup>H NMR (400 MHz) and <sup>13</sup>C{<sup>1</sup>H} NMR (100 MHz) spectra of **8[6]** (DMSO-*d*<sub>6</sub>).



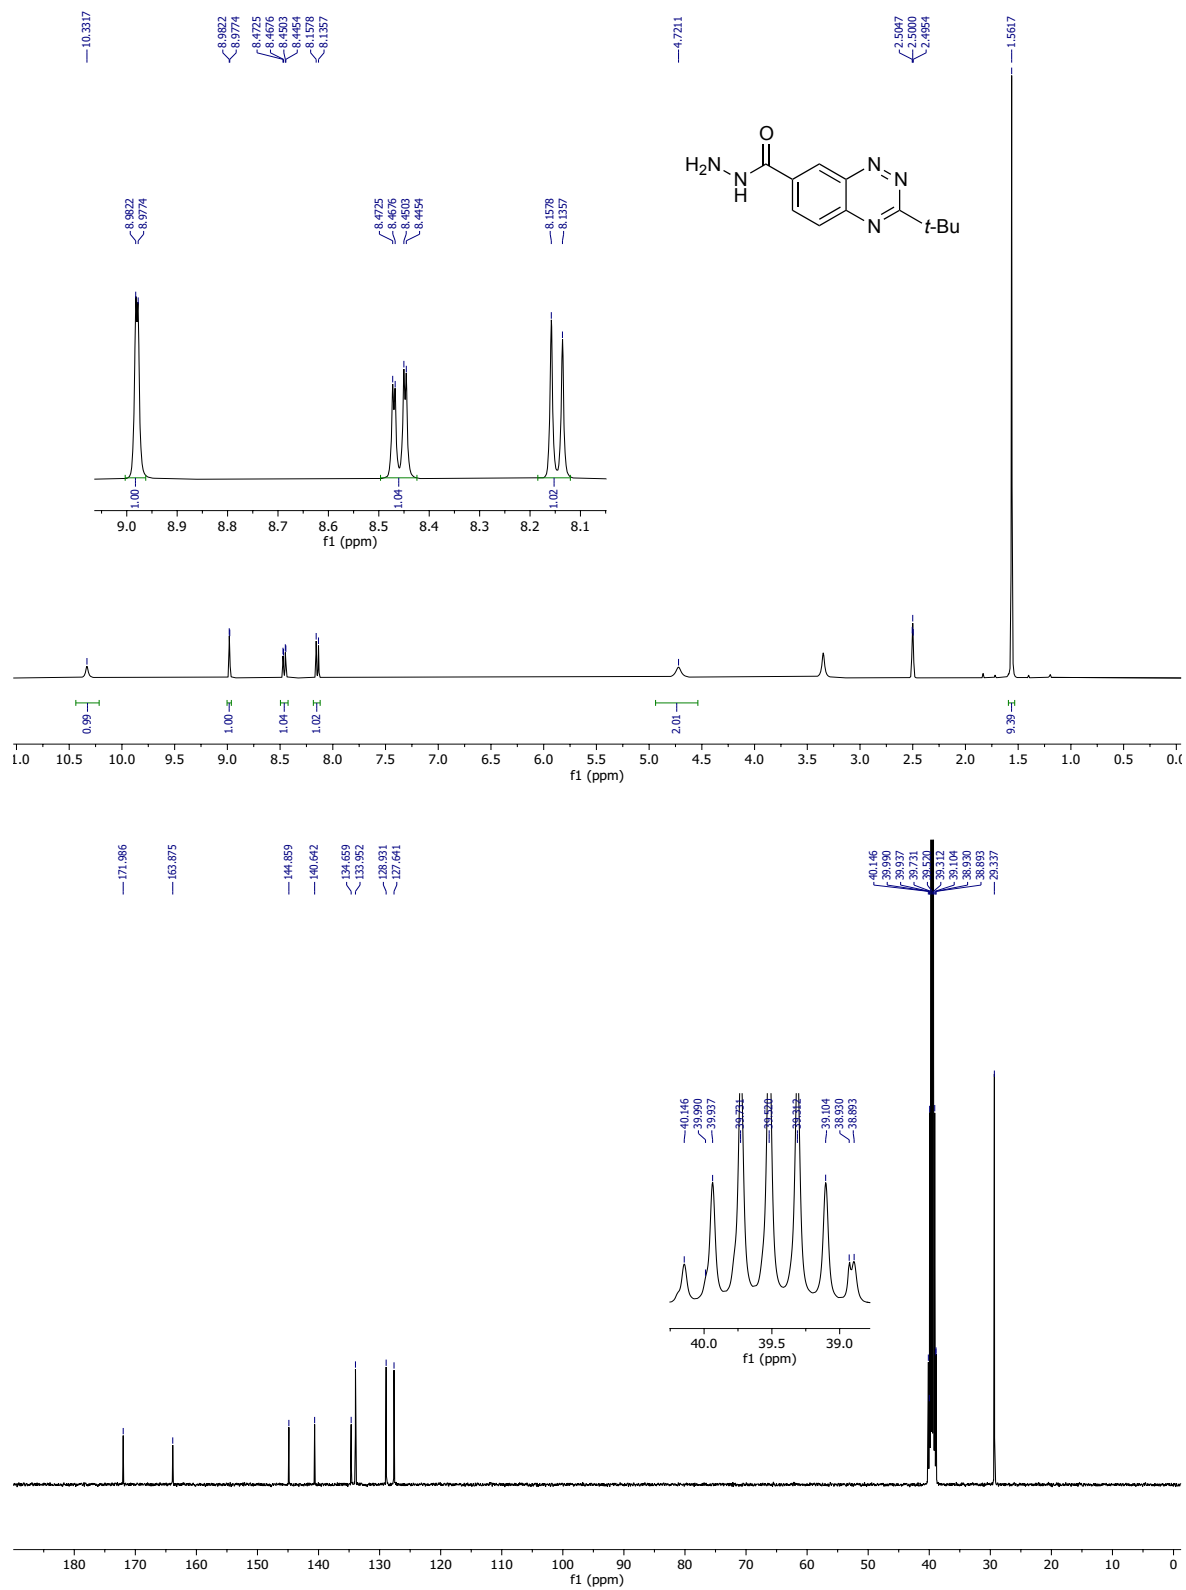

Figure S11. <sup>1</sup>H NMR (400 MHz) and <sup>13</sup>C{<sup>1</sup>H} NMR (100 MHz) spectra of 8[7] (DMSO-*d*<sub>6</sub>).

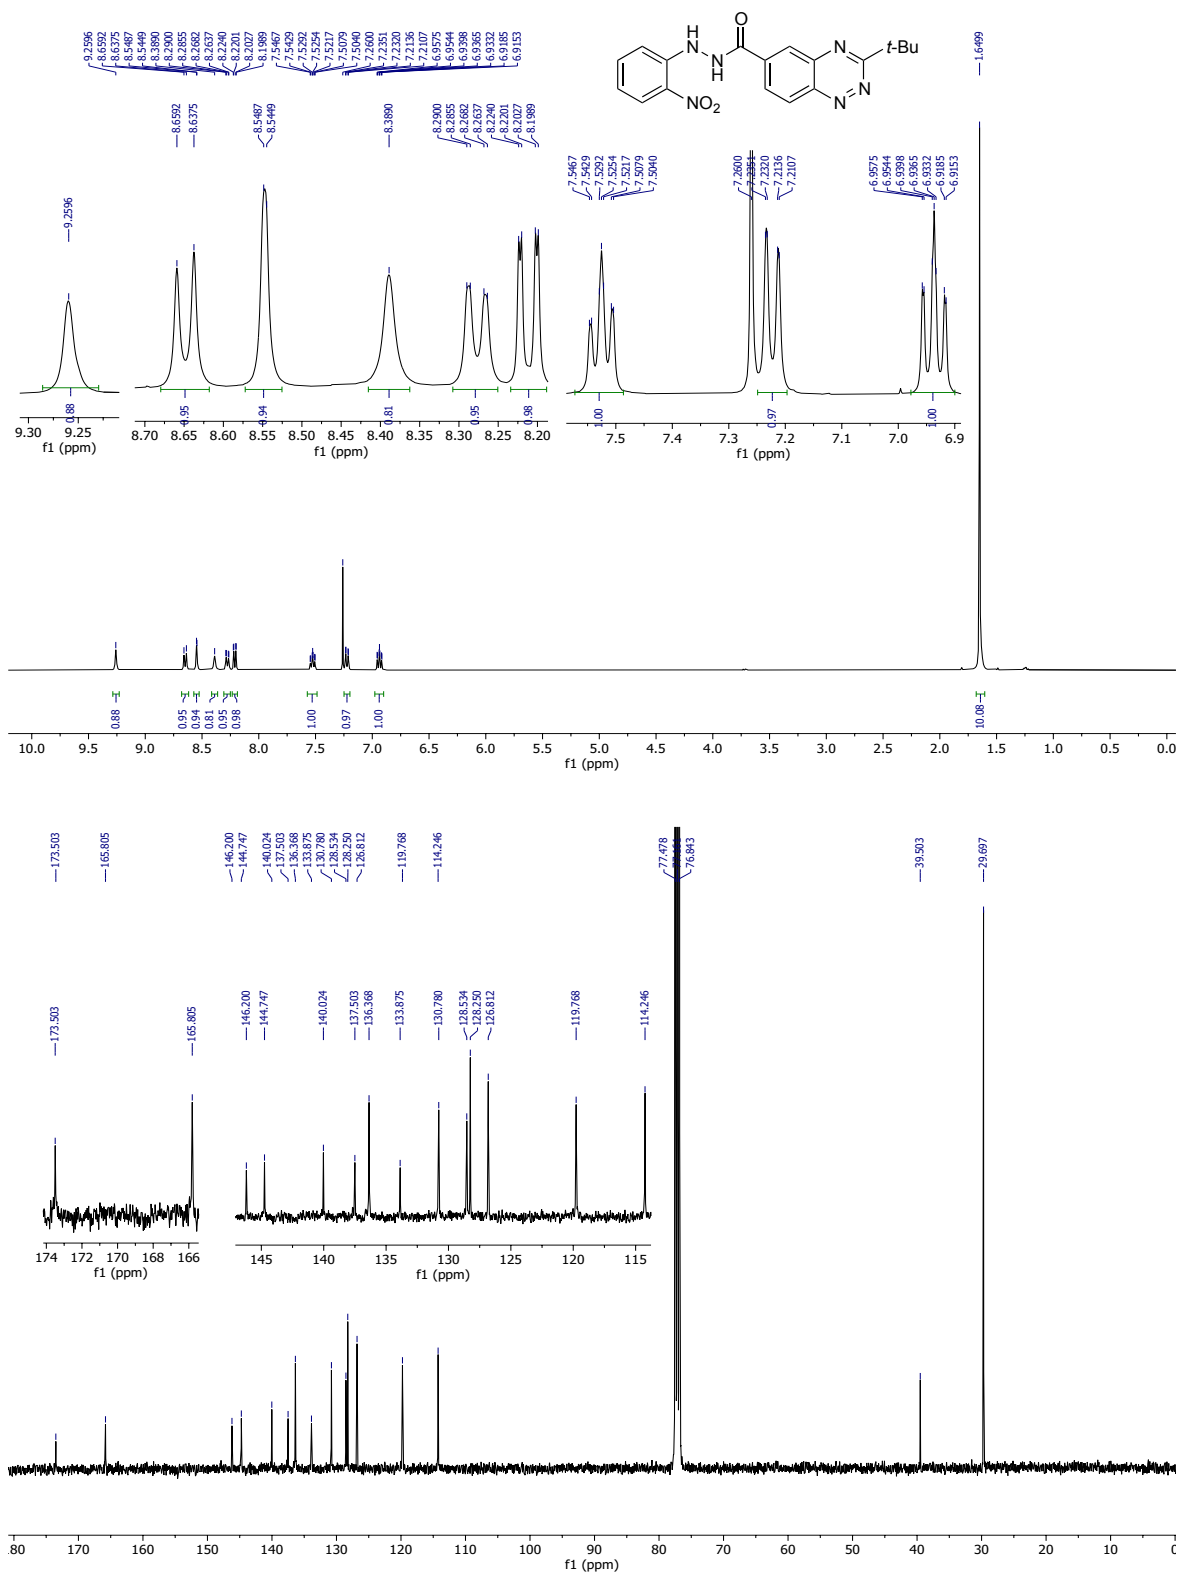

Figure S12. <sup>1</sup>H NMR (400 MHz) and <sup>13</sup>C{<sup>1</sup>H} NMR (100 MHz) spectra of 9[6] (CDCl<sub>3</sub>).

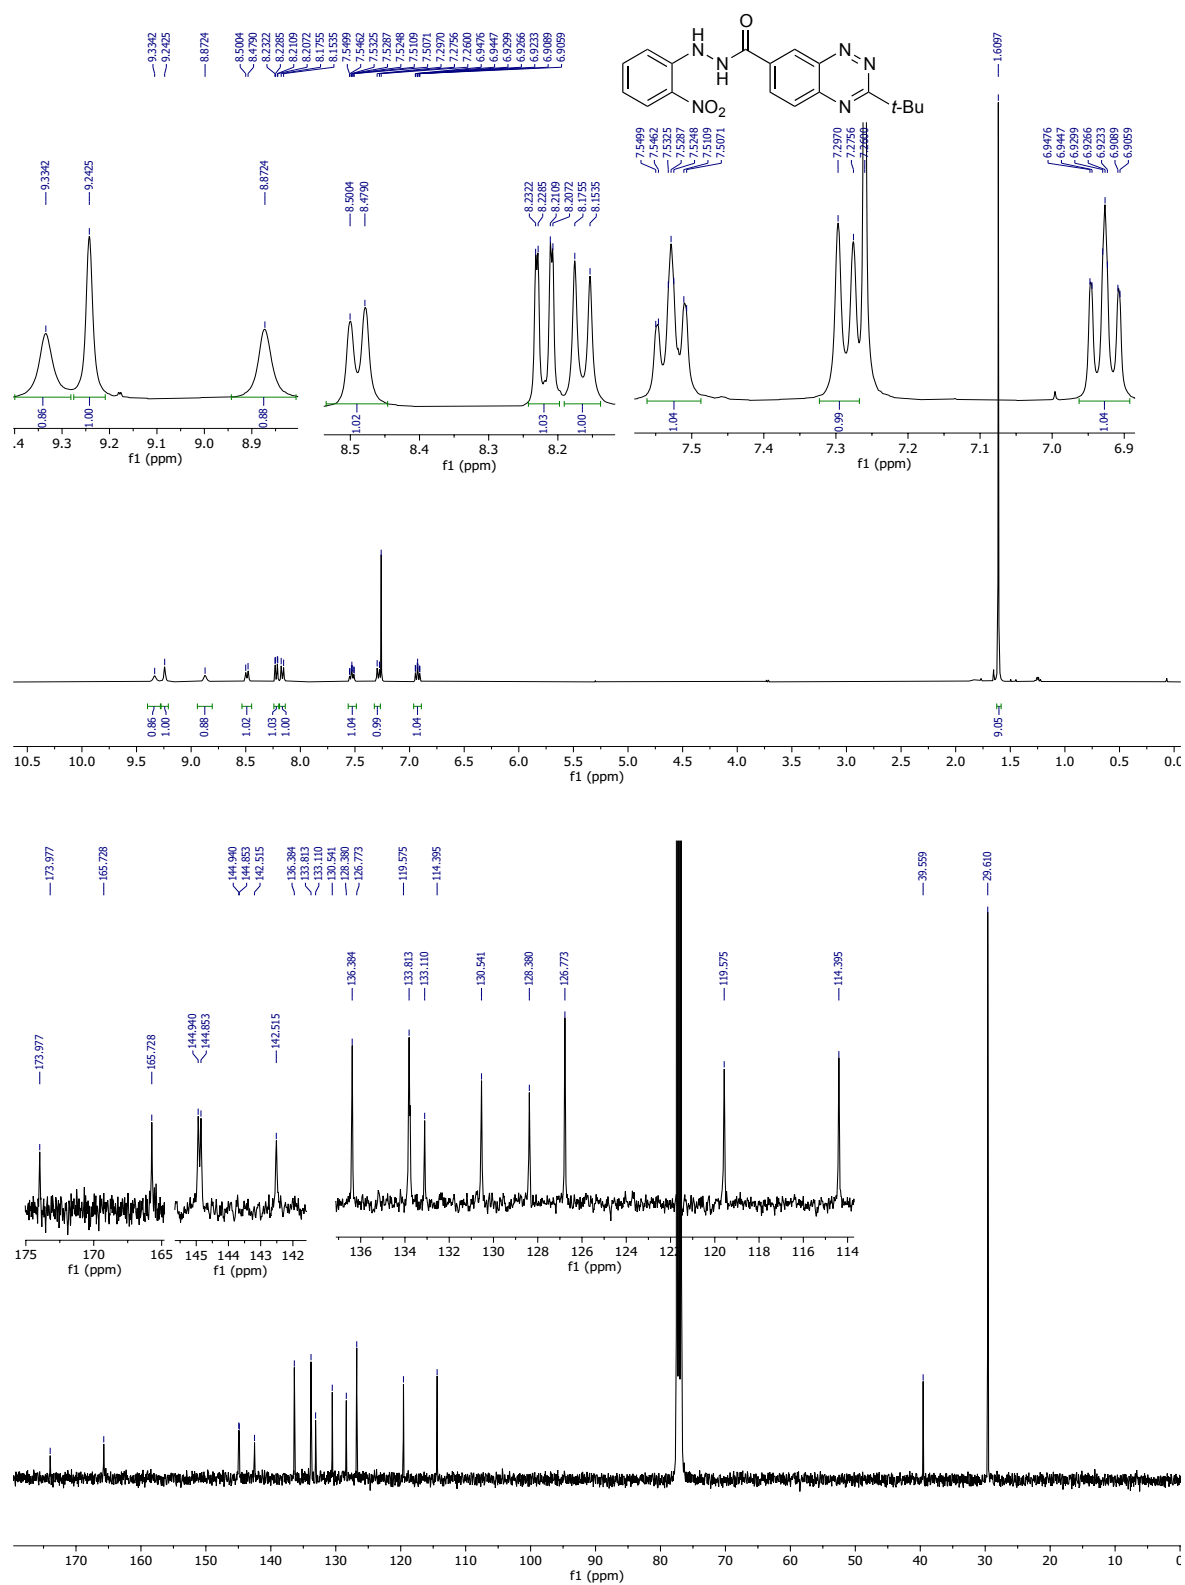

Figure S13. <sup>1</sup>H NMR (400 MHz) and <sup>13</sup>C{<sup>1</sup>H} NMR (100 MHz) spectra of 9[7] (CDCl<sub>3</sub>).

## 2. IR spectra

IR spectra of diradicals **1[3,n]** were obtained for polycrystalline samples using ATR-FTIR setup Nicolet 6700 and results are shown in Figures S14 and S15.

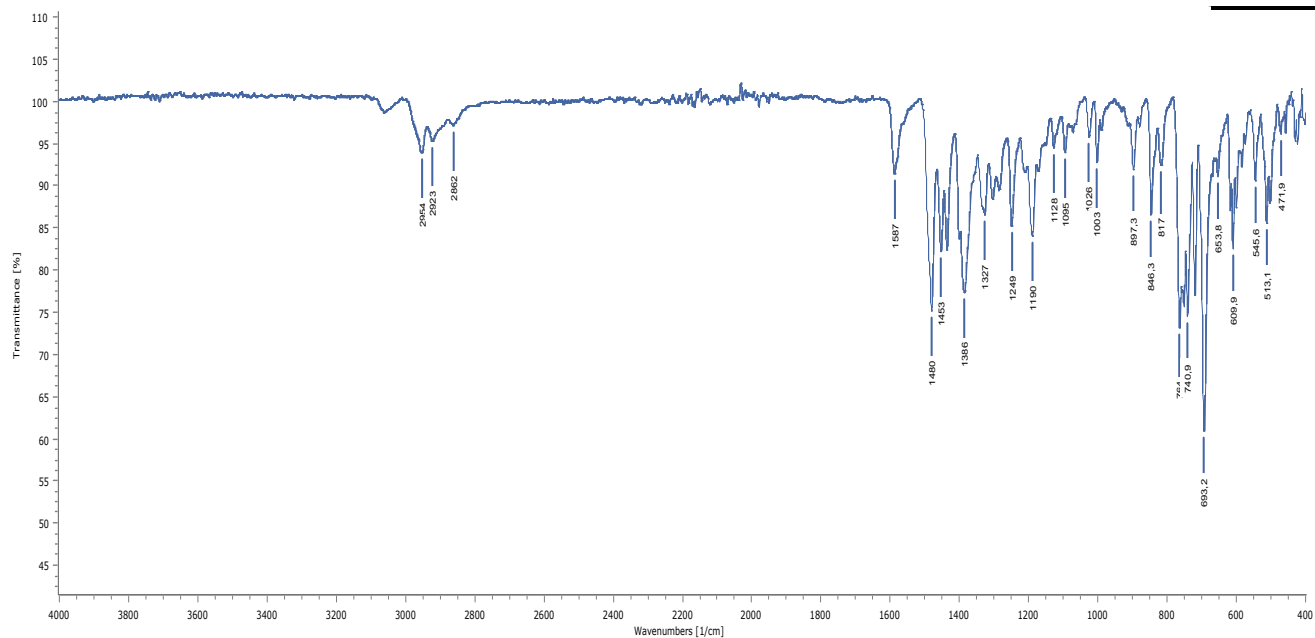

Figure S14. ATR-IR spectra for **1[3,6]**.

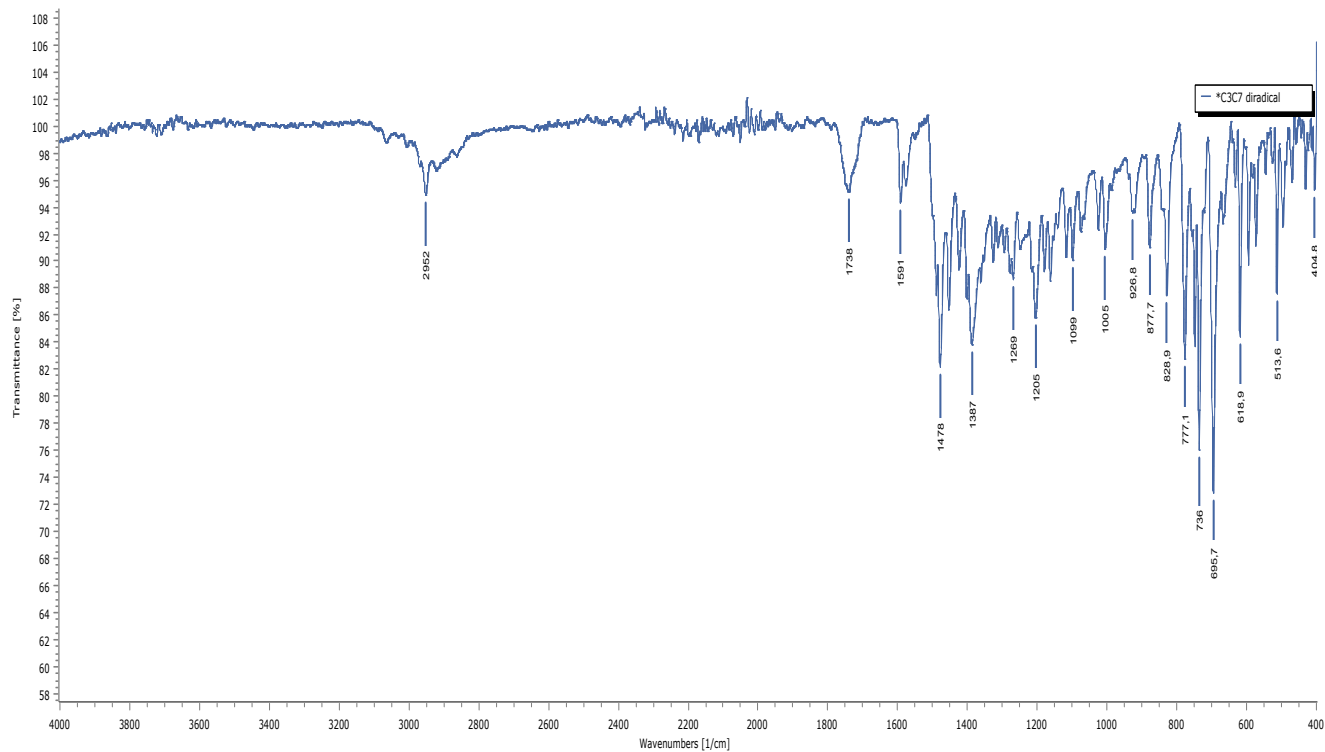

Figure S15. ATR-IR spectra for **1[3,7]**.

### 3. XRD data collection and refinement

#### *Data Collection*

Crystals of diradicals **1[3,6]** and **1[3,7]** were grown by slow evaporation of CH<sub>2</sub>Cl<sub>2</sub>/MeCN solutions at ambient temperature.

Single-crystal X-ray diffraction measurements for **1[3,6]** and **1[3,7]** were performed with XtaLAB Synergy, Pilatus 300 K diffractometer. All measurements were conducted at 100.0(1) K using CuK $\alpha$  radiation ( $\lambda = 1.54184$  Å). The data were integrated using CrysAlisPro program. Intensities for absorption were corrected using SCALE3 ABSPACK scaling algorithm implemented in CrysAlisPro program.<sup>7</sup>

#### *Structure solution and refinement*

Both structures **1[3,6]** and **1[3,7]** were solved with the ShelXT structure solution program<sup>8</sup> using Intrinsic Phasing and refined by the full-matrix least-squares minimization on  $F^2$  with the ShelXL refinement package.<sup>9</sup> All non-hydrogen atoms were refined anisotropically. All hydrogen atoms were generated geometrically and refined isotropically using the riding model. Asymmetric unit of **1[3,6]** contains three water molecules and two of them are disordered over two positions each. Occupancy factors for two sites of water molecules defined by O1 and O2 atoms are 0.553(5):0.447(5) and 0.537(5):0.463(5), respectively. The oxygen atom O2b of one disordered water molecule was refined isotropically. Crystals of **1[3,7]** are twinned. The measured one was refined as a merohedral twin with scales 0.907(2):0.093(2). The twin law was applied by the instruction TWIN 1 0 0 0 -1 0 1 0 1.

The crystal data and structure refinement descriptors for **1[3,6]** and **1[3,7]** are presented in Table S1. Their molecular structures are shown in Figures S16 and S17 unit cell packing diagrams in Figures S18 and S19, and partial packing in Figures S20 and S21. Table S2 contains a list of close nonbonding intermolecular distances in both crystal structures.

CCDC 232867 and 232868 contain the supplementary crystallographic data for this paper. These data can be obtained free of charge from The Cambridge Crystallographic Data Centre via [www.ccdc.cam.ac.uk/structures](http://www.ccdc.cam.ac.uk/structures)"

**Table S1.** Crystal data and refinement details for diradicals **1[3,n]**.

| Compound                                            | <b>1[3,6]</b>                                                     | <b>1[3,7]</b>                                                    |
|-----------------------------------------------------|-------------------------------------------------------------------|------------------------------------------------------------------|
| CCDC                                                | 2328268                                                           | 2328267                                                          |
| Empirical formula                                   | C <sub>60</sub> H <sub>58</sub> N <sub>12</sub> O <sub>3</sub>    | C <sub>30</sub> H <sub>26</sub> N <sub>6</sub>                   |
| Formula weight                                      | 995.18                                                            | 470.57                                                           |
| Crystal system                                      | Triclinic                                                         | Monoclinic                                                       |
| Space group                                         | $P\bar{1}$                                                        | $P21/c$                                                          |
| <i>a</i> /Å                                         | 6.72380(10)                                                       | 10.4665(12)                                                      |
| <i>b</i> /Å                                         | 17.1497(4)                                                        | 6.8859(6)                                                        |
| <i>c</i> /Å                                         | 22.8862(5)                                                        | 32.972(3)                                                        |
| $\alpha$ /°                                         | 100.979(2)                                                        | 90                                                               |
| $\beta$ /°                                          | 95.399(3)                                                         | 98.817(11)                                                       |
| $\gamma$ /°                                         | 92.002(4)                                                         | 90                                                               |
| Volume/Å <sup>3</sup>                               | 2575.46(9)                                                        | 2348.2(4)                                                        |
| Z                                                   | 2                                                                 | 4                                                                |
| Goodness-of-fit                                     | 1.039                                                             | 1.071                                                            |
| <i>R</i> <sub>int</sub>                             | 0.0666                                                            | 0.1086                                                           |
| Final <i>R</i> indexes [ <i>I</i> ≥ 2σ( <i>I</i> )] | <i>R</i> <sub>1</sub> =0.0582, <i>wR</i> <sub>2</sub> =0.1555     | <i>R</i> <sub>1</sub> =0.1039,<br><i>wR</i> <sub>2</sub> =0.2937 |
| Final <i>R</i> indexes [all data]                   | <i>R</i> <sub>1</sub> =0.0733,<br><i>wR</i> <sub>2</sub> = 0.1655 | <i>R</i> <sub>1</sub> =0.1574,<br><i>wR</i> <sub>2</sub> =0.3399 |
| Largest diff. peak/hole /eÅ <sup>-3</sup>           | 0.54/0.32                                                         | 0.38/-0.39                                                       |

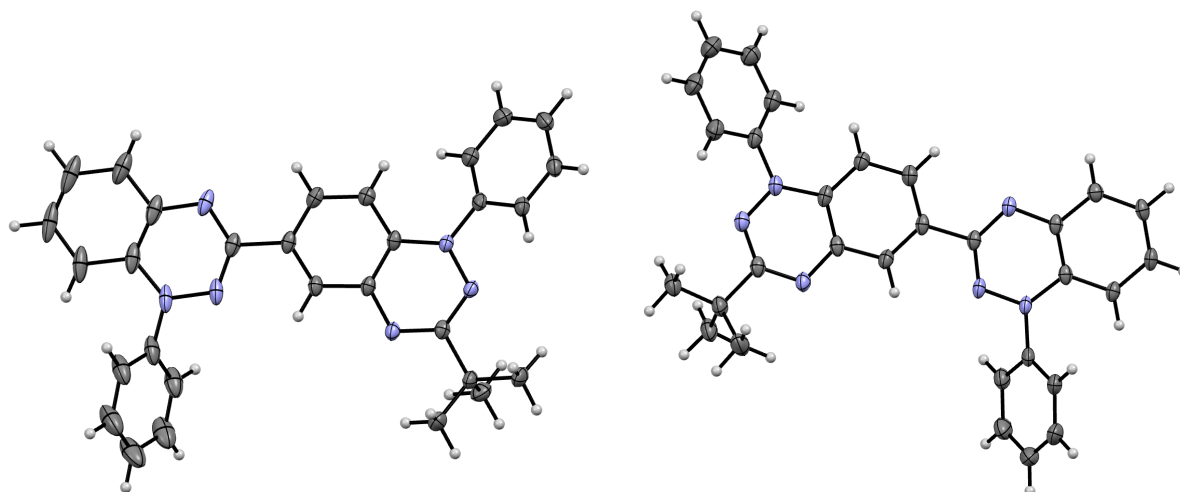**Figure S16.** Atomic displacement ellipsoid diagram for two unique molecules of diradical **1[3,6]**. Ellipsoids are drawn at 50% probability level. Color code: carbon, dark gray; blue, nitrogen.

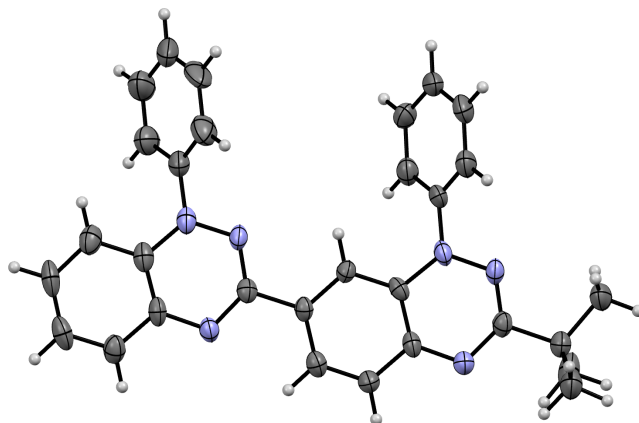

**Figure S17.** Atomic displacement ellipsoid diagram for diradical **1[3,7]**. Ellipsoids are drawn at 50% probability level. Color code: carbon, dark gray; blue, nitrogen.

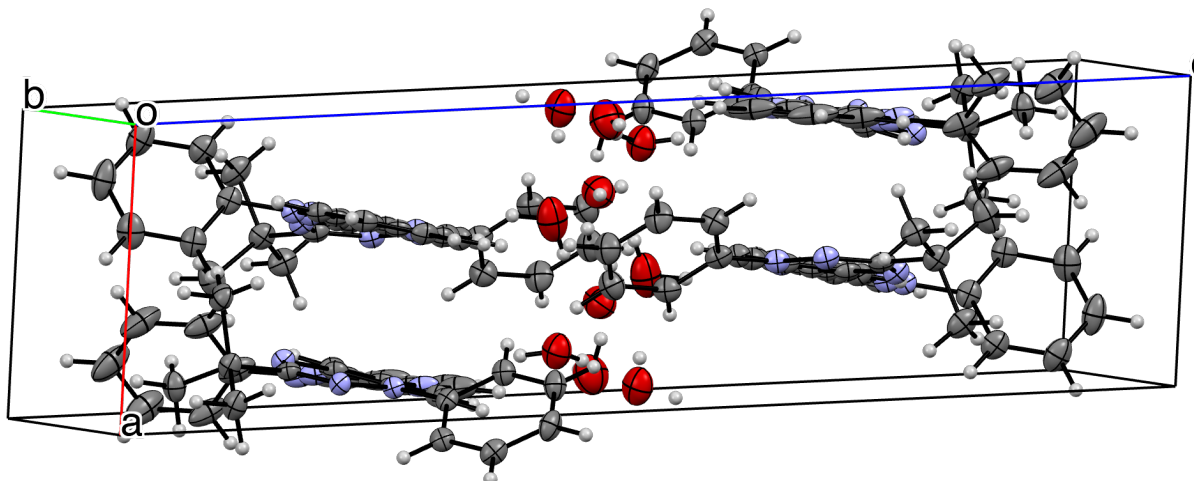

**Figure S18.** Unit cell packing diagram for **1[3,6]**. Ellipsoids are drawn at 50% probability level. The diagram contains disordered sites of water molecules. Color code: carbon, dark gray; blue, nitrogen; red, oxygen.

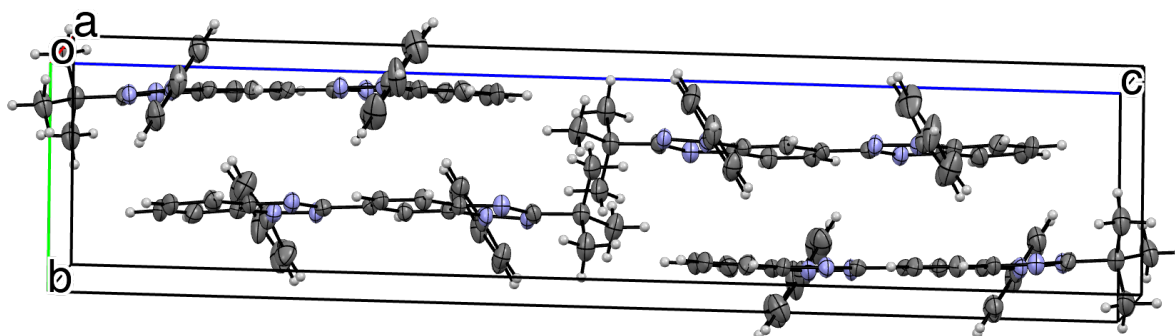

**Figure S19.** Unit cell packing diagram for **1[3,7]**. Ellipsoids are drawn at 50% probability level. Color code: carbon, dark gray; blue, nitrogen.

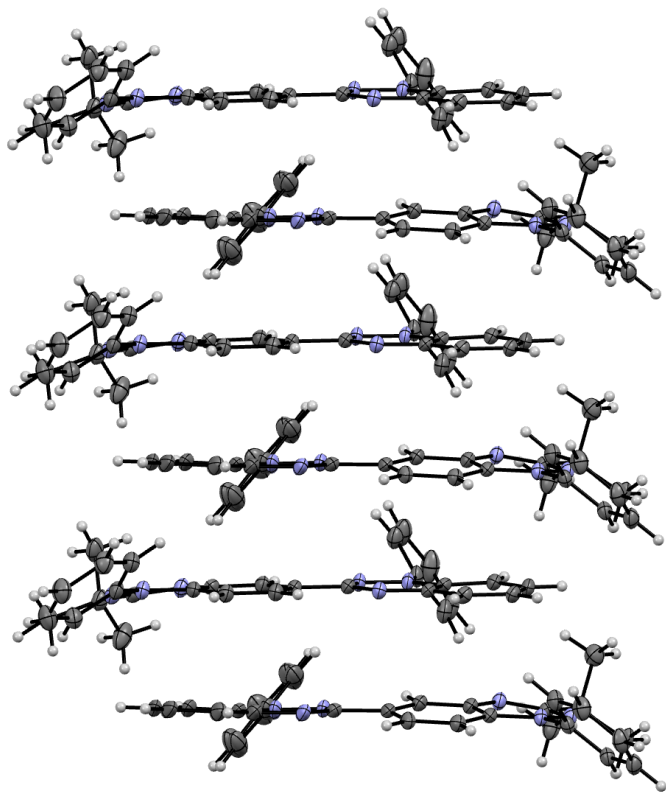

**Figure S20.** Partial packing diagram for **1[3,6]**. Ellipsoids are drawn at 50% probability level. Color code: carbon, dark gray; blue, nitrogen.

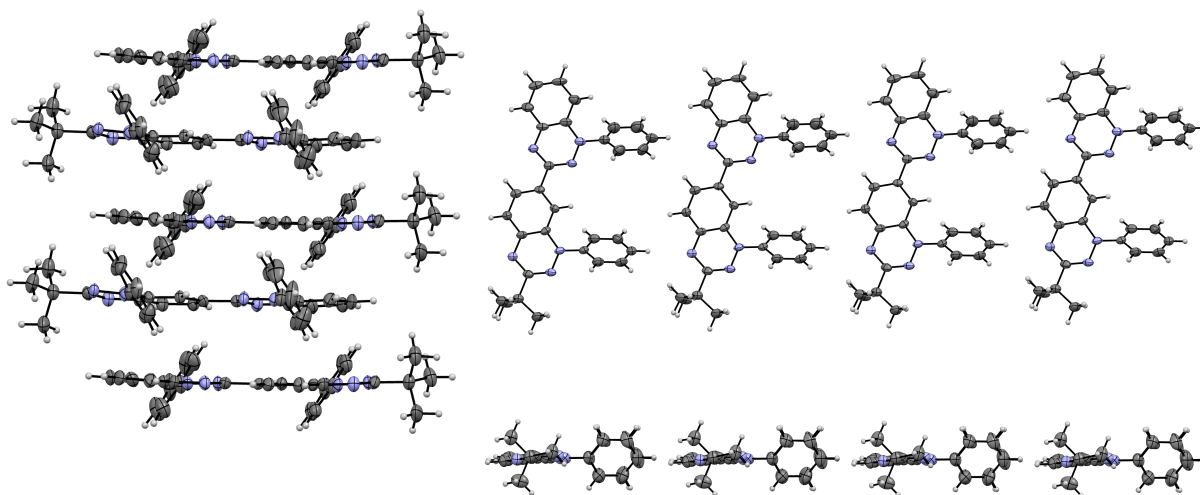

**Figure S21.** Partial packing diagrams for **1[3,7]**; left: the stack, right: two views of the sheet. Ellipsoids are drawn at 50% probability level. Color code: carbon, dark gray; blue, nitrogen.



**Table S2.** Selected close contacts in the solid-state structures of **1[3,n]** with the threshold of - 0.07 Å.

| Contact<br>X...Y                        | $d_{X...Y}$<br>/Å | $d_{X-Y}-VdW$<br>/Å |
|-----------------------------------------|-------------------|---------------------|
| <b>1[3,6], in the unique pair:</b>      |                   |                     |
| C(5)...C(8a')                           | 3.296             | -0.104              |
| C(5)...C(8')                            | 3.239             | -0.161              |
| N(4)...H(C <sub>ortho</sub> ')          | 2.699             | -0.081              |
| <u>between the dimers in the stack:</u> |                   |                     |
| C(5')...C(8)                            | 3.231             | -0.169              |
| N(4)...H(C <sub>ortho</sub> ')          | 2.468             | -0.282              |
| C(6')...C <sub>ortho</sub>              | 3.316             | -0.081              |
| <b>1[3,7] in the stack:</b>             |                   |                     |
| C(8a')...C(5)                           | 3.323             | -0.077              |
| <u>in the sheet:</u>                    |                   |                     |
| N(4)...H(C <sub>para</sub> )            | 2.600             | -0.150              |
| N(4')...H(C <sub>para</sub> ')          | 2.650             | -0.100              |

#### 4. Electronic absorption spectroscopy

Electronic absorption spectra of diradicals **1[3,n]** were recorded on a Jasco V770 spectrophotometer in spectroscopic grade CH<sub>2</sub>Cl<sub>2</sub> at concentrations in a range of 2–8×10<sup>-5</sup> mol·L<sup>-1</sup> and the measurements were recorded immediately after. The measured UV-vis spectra were fitted to the Beer–Lambert law ( $A = \epsilon cl$ ), the molar absorption coefficient ( $\epsilon$ ) was derived from the linear plots. Results are shown in Figures S22 and S23.

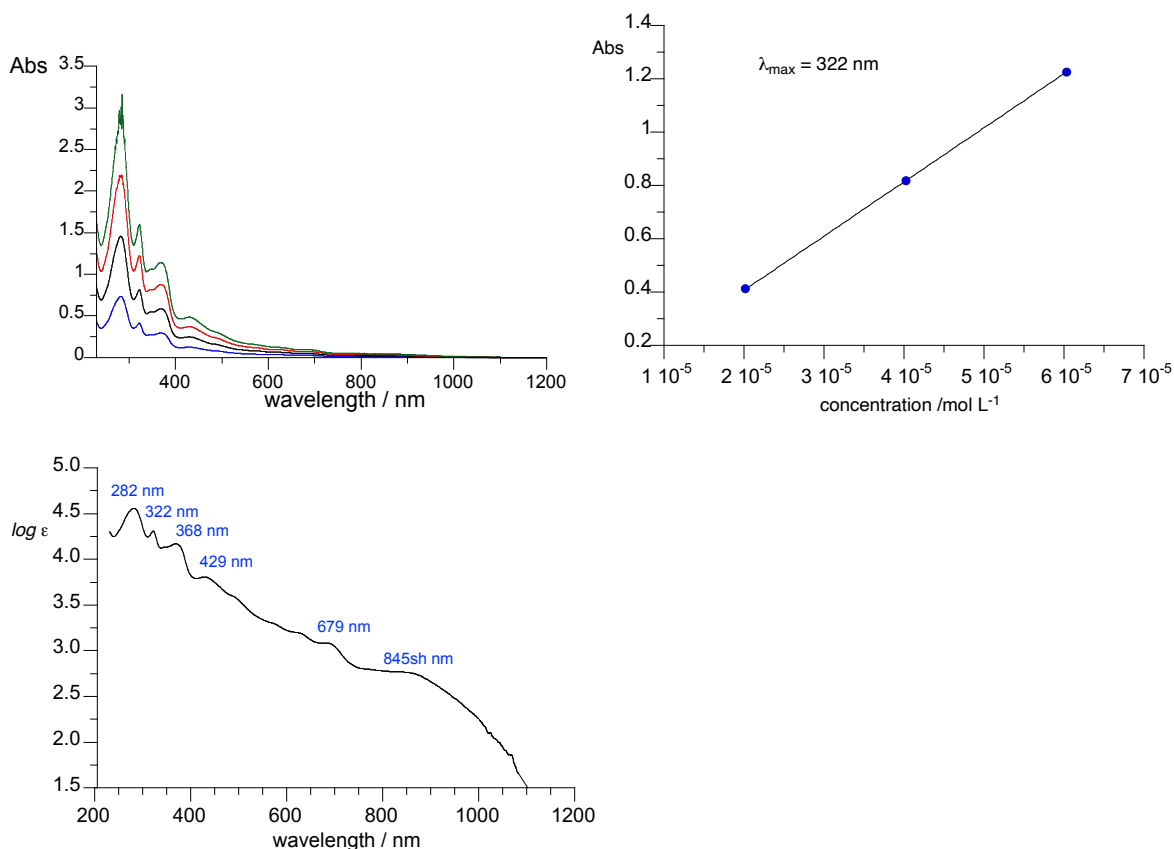

**Figure S22.** Clockwise: electronic absorption spectra of diradical **1[3,6]** in  $\text{CH}_2\text{Cl}_2$  for four different concentrations, determination of molar extinction coefficient  $\epsilon$  at  $\lambda = 322.0 \text{ nm}$  (best fit function:  $\epsilon = 20311(28) \times \text{conc}$ ,  $r^2 = 0.9999$ ), and molar extinction  $\log(\epsilon)$  plot.

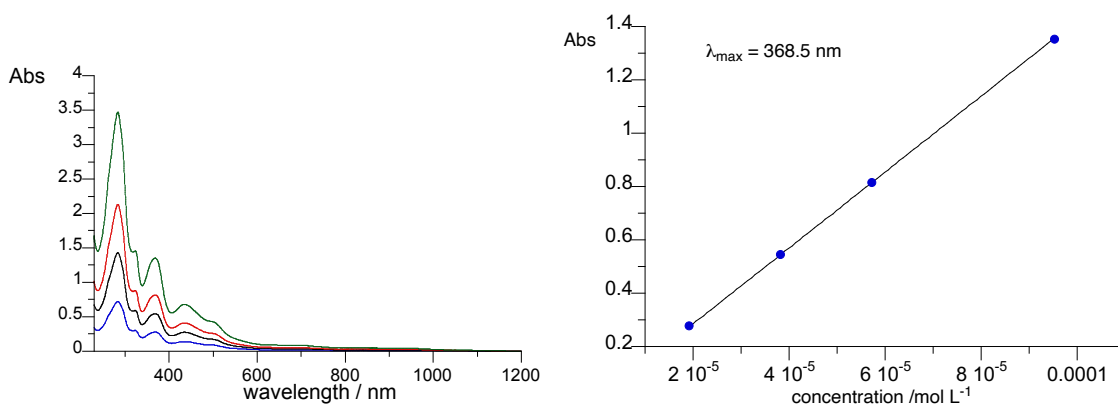

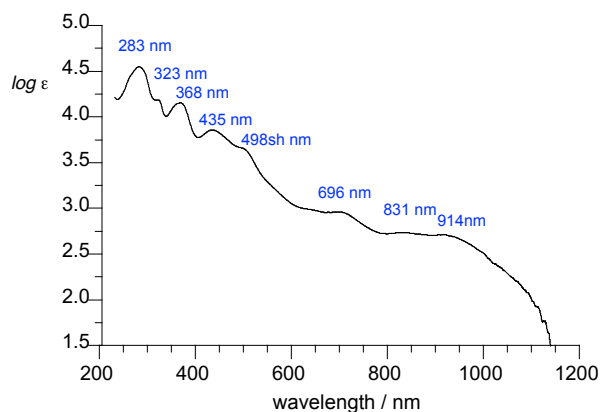

**Figure S23.** Clockwise: electronic absorption spectra of diradical **1[3,7]** in  $\text{CH}_2\text{Cl}_2$  for four different concentrations, determination of molar extinction coefficient  $\epsilon$  at  $\lambda = 368.5 \text{ nm}$  (best fit function:  $\epsilon = 7554.5(62) \times \text{conc}$ ,  $r^2 = 0.999$ ), and molar extinction  $\log(\epsilon)$  plot.

## 5. Electrochemical results

Electrochemical characterization of diradicals **1[3,n]** was conducted using a Metrohm Autolab PGSTAT 128N potentiostat/galvanostat instrument. Diradical **1[3,n]** was dissolved in dry, spectroscopic grade  $\text{CH}_2\text{Cl}_2$  (concentration 1.5 mM) in the presence of  $[n\text{-Bu}_4\text{N}]^+[\text{PF}_6]^-$  as an electrolyte (concentration 100 mM) and the resulting solution was degassed by purging with Ar gas for 20 min. A three-electrode electrochemical cell was used with glassy carbon disk as the working electrode ( $\phi$  2 mm, alumina polished), Pt wire as the counter electrode and Ag/AgCl wire as the pseudoreference electrode. All samples were measured without internal reference once and afterwards with  $\text{FcMe}_{10}$  as the internal reference couple with a scan rate of  $50 \text{ mV s}^{-1}$  (CV) or  $5 \text{ mV s}^{-1}$  (DPV) at *ca.*  $20 \text{ }^\circ\text{C}$ . The oxidation potential for the  $\text{FcMe}_{10}/\text{FcMe}_{10}^+$  couple was established at  $-0.556 \text{ V}$  in  $\text{CH}_2\text{Cl}_2$  vs  $\text{Fc}/\text{Fc}^+$ , by comparison with the oxidation potential for the  $\text{Fc}/\text{Fc}^+$  couple ( $0.0 \text{ V}$ ).

Cyclic voltammetry (CV) measurements were started from  $0.0 \text{ V}$  in the oxidative direction, while differential pulse voltammetry (DPV) measurements were conducted starting from  $-1.6 \text{ V}$  in the oxidative direction (blue line) and starting from  $0.9 \text{ V}$  in the reductive direction (black line). Cyclic voltammetry (CV) and Differential pulse voltammetry (DPV) plots are shown in Figures S24 and S25 and numerical results are shown in Table S3.

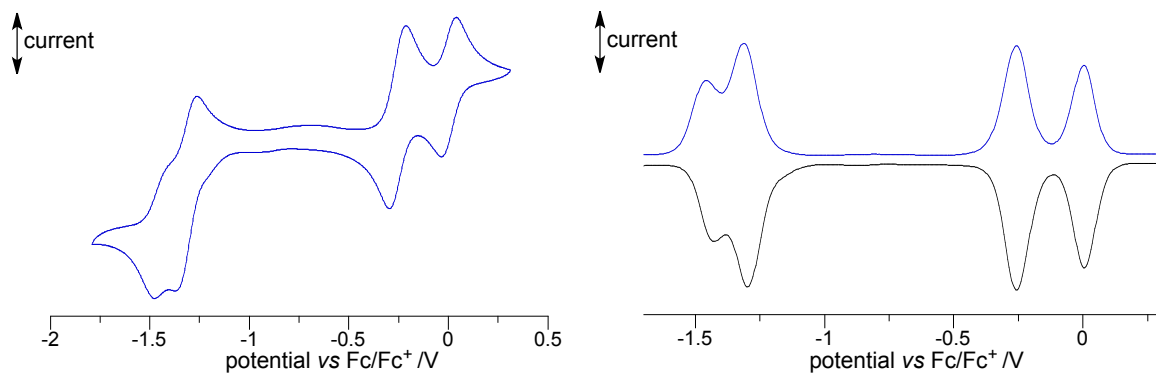

**Figure S24.** Cyclic voltammogram (CV, left) and differential pulse voltammogram (DPV, right) for **1[3,6]** in  $\text{CH}_2\text{Cl}_2$  referenced to the  $\text{Fc}/\text{Fc}^+$  couple.

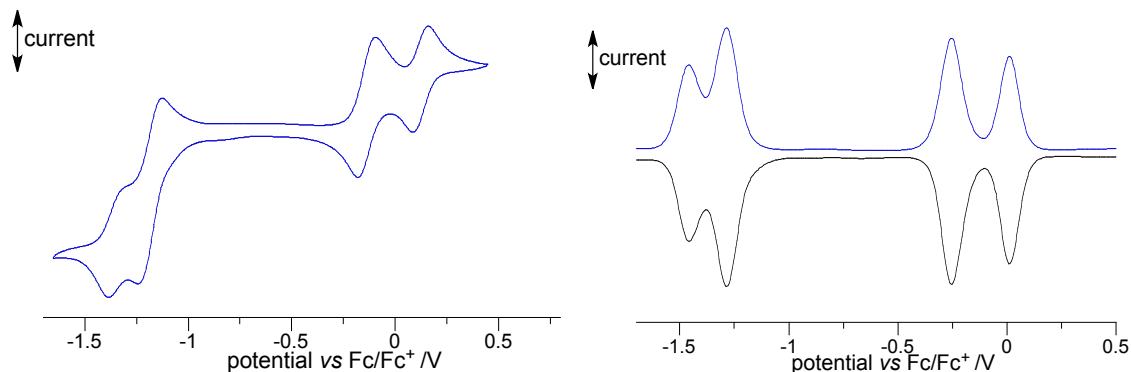

**Figure S25.** Cyclic voltammogram (CV, left) and differential pulse voltammogram (DPV, right) for **1[3,7]** in  $\text{CH}_2\text{Cl}_2$  referenced to the  $\text{Fc}/\text{Fc}^+$  couple.

**Table S3.** Electrochemical properties of diradicals **1[3,n]**.<sup>a</sup>

| diradical     | $E_{1/2}^{2-/}$<br>/V | $E_{1/2}^{-/0}$<br>/V | $\Delta E_{\text{red}}$<br>/V | $E_{1/2}^{+/0}$<br>/V | $E_{1/2}^{+/2+}$<br>/V | $\Delta E_{\text{ox}}$<br>/V | $\Delta E_{\text{cell}}(1)^b$<br>/V | $\Delta E_{\text{cell}}(2)^b$<br>/V |
|---------------|-----------------------|-----------------------|-------------------------------|-----------------------|------------------------|------------------------------|-------------------------------------|-------------------------------------|
| <b>1[3,6]</b> | -1.44                 | -1.31                 | 0.13                          | -0.26                 | 0.01                   | 0.27                         | 1.05                                | 1.43                                |
| <b>1[3,7]</b> | -1.46                 | -1.29                 | 0.16                          | -0.25                 | 0.01                   | 0.26                         | 1.04                                | 1.45                                |

<sup>a</sup> Data from DPV measurements. Measured in  $\text{CH}_2\text{Cl}_2$  [ $n\text{-Bu}_4\text{N}^+[\text{PF}_6]^-$ ] (100 mM), *ca.* 20 °C, 5  $\text{mVs}^{-1}$  (DPV), glassy carbon electrode. Potentials referenced to  $\text{Fc}/\text{Fc}^+$ . <sup>b</sup> $\Delta E_{\text{cell}}(1) = E_{1/2}^{+/0} - E_{1/2}^{-/0}$ ;  $\Delta E_{\text{cell}}(2) = E_{1/2}^{+/2+} - E_{1/2}^{2-/}$ .

## 6. Details of VT EPR spectroscopy and data analysis

### a) sample preparation

A solution of polystyrene (200.0 mg,  $d = 1.04 \text{ g cm}^{-3}$ ) in dry and distilled  $\text{CH}_2\text{Cl}_2$  (4 mL) was degassed in vacuum and diradical **1[3,n]** (0.470 mg,  $9.98 \times 10^{-4}$  mmol) was added and

mixed till a homogenous mixture was formed. The resulting mixture was degassed in vacuum till complete evaporation of the solvent and formation of a fragile polystyrene film. The film was then dried for 1 h, divided into smaller pieces, placed in an EPR tube and tightly packed using a glass rod. The EPR tube containing the sample was blown with argon gas, tightly closed, and variable temperature measurement was performed.

### ***b) measurement***

Variable temperature EPR spectra for diradicals **1[3,n]** were recorded on an X-band EMX-Nano EPR spectrometer equipped with a frequency counter and nitrogen flow temperature control (120 K to ~334 K) in degassed solid polystyrene (PS) solutions (5.2 mM) at 120 K exhibit patterns with randomly oriented triplets contaminated with signal from the doublet impurity (the middle singlet). The optimum microwave power for the measurement was determined from the linear portion of the plot of signal intensity (double integral, DI, of the spectrum) vs square root of microwave power (Figures S26 and S27) at 120 K and ambient temperature. Half-field transition  $|\Delta m_s| = 2$  was observed in both diradicals at low temperature for lower signal attenuation (Figure S28).

Variable-temperature EPR spectra for diradicals **1[3,n]** were recorded in a range 120–334 K typically every 5 K and attenuation of 22 dB. At each temperature spectra were recorded three times and averaged and selected plots are shown in Figure S28.

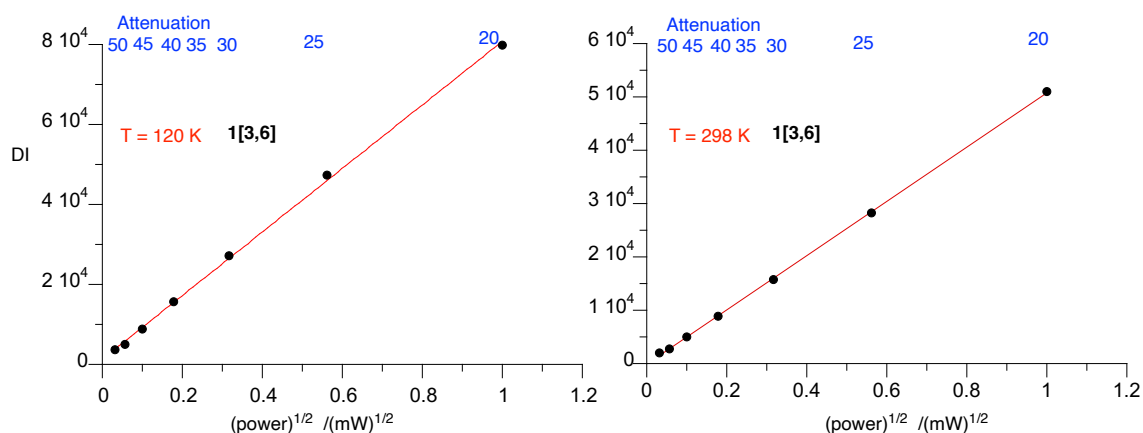

**Figure S26.** EPR double integrated signal intensity (DI) versus the square root of microwave power for 5.2 mM diradical **1[3,6]** in polystyrene at 120 K (left) and 298 K (right). Best fit lines:  $DI_{120} = 1315 + 79469 \times (\text{power})^{1/2}$ ,  $r^2 = 0.9992$ ;  $DI_{298} = -61.6 + 50768 \times (\text{power})^{1/2}$ ,  $r^2 = 0.9998$ .

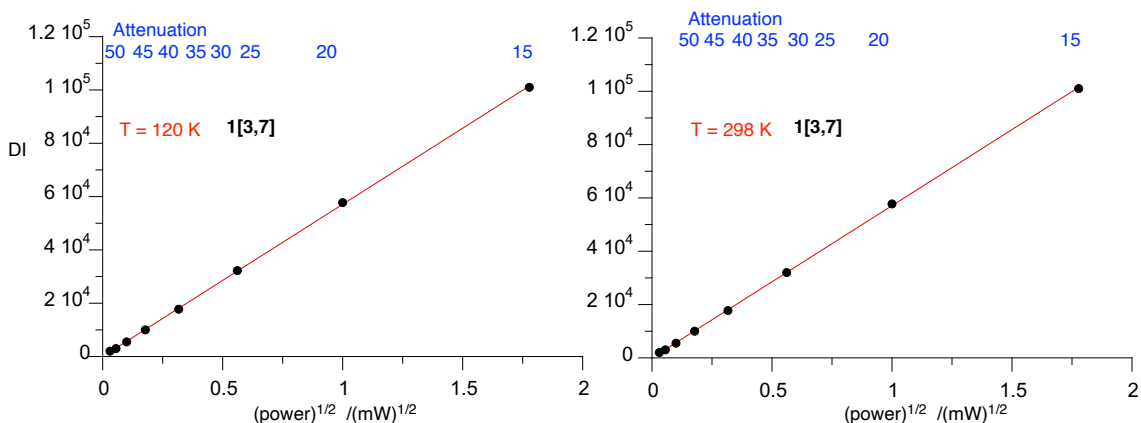

**Figure S27.** EPR double integrated signal intensity (DI) versus the square root of microwave power for 5.2 mM diradical **1[3,7]** in polystyrene at 120 K (left) and 298 K (right). Best fit lines:  $DI_{120} = -5.2 + 57038 \times (\text{power})^{1/2}$ ,  $r^2 = 0.9999$ ;  $DI_{298} = -82.1 + 57101 \times (\text{power})^{1/2}$ ,  $r^2 = 0.9999$ .

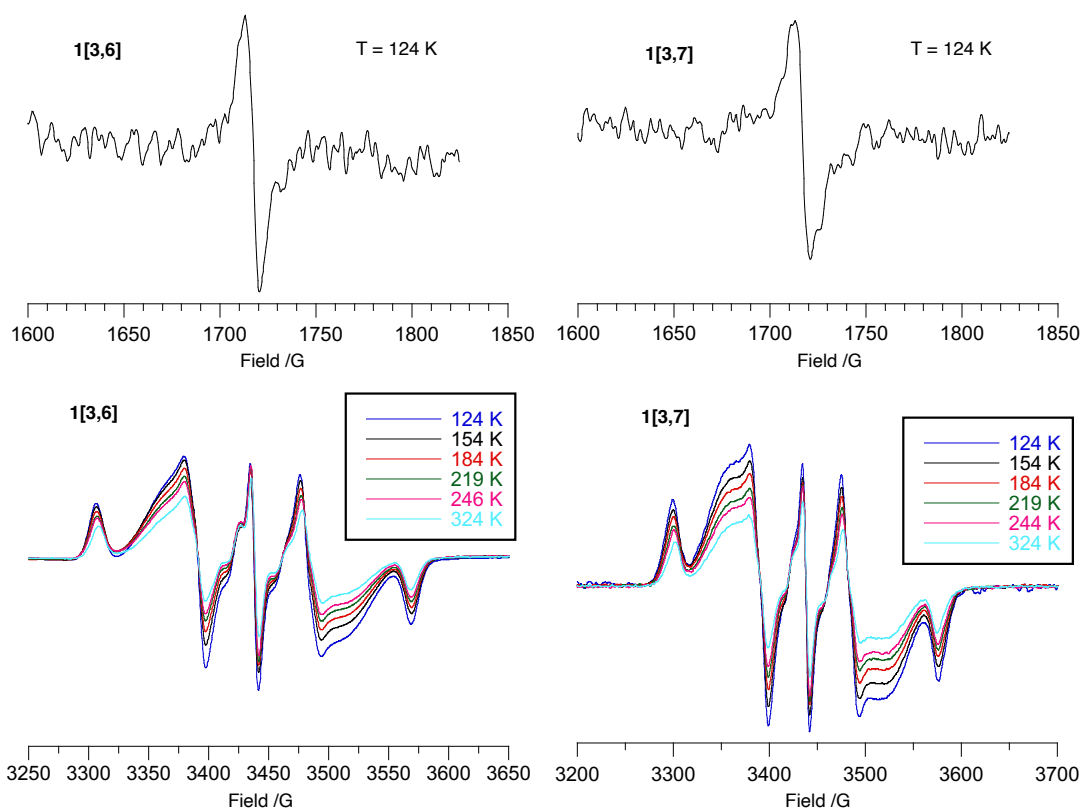

**Figure S28.** Half-field transitions (top) and variable temperature spectra (bottom) recorded for 5.2 mM diradical **1[3,6]** (left) and **1[3,7]** (right) in polystyrene at 22 dB in the temperature range 124–324 K.

*c) spectra analysis and simulation*

EPR spectra were double integrated and the resulting DI intensities were normalized for the intensity at the lowest temperature. The resulting  $DI_{rel}$  values are shown in Tables S4 and S5.

**Table S4.** Double integral and normalized data for **1[3,6]**.

| Temp<br>/K | DI    | DI/DI <sub>120</sub> | DI <sub>rel</sub> •T | Temp<br>/K | DI    | DI/DI <sub>120</sub> | DI <sub>rel</sub> •T |
|------------|-------|----------------------|----------------------|------------|-------|----------------------|----------------------|
| 120        | 58640 | 1.0000               | 120.40               | 229        | 41730 | 0.71163              | 163.18               |
| 124        | 55900 | 0.95327              | 118.49               | 234        | 40730 | 0.69458              | 162.53               |
| 130        | 55430 | 0.94526              | 122.60               | 240        | 39700 | 0.67701              | 162.14               |
| 134        | 55840 | 0.95225              | 127.70               | 246        | 39720 | 0.67735              | 166.29               |
| 139        | 56030 | 0.95549              | 132.91               | 249        | 38490 | 0.65638              | 163.57               |
| 144        | 55760 | 0.95089              | 137.02               | 254        | 38150 | 0.65058              | 165.31               |
| 149        | 55110 | 0.93980              | 140.12               | 259        | 37310 | 0.63626              | 165.04               |
| 154        | 54390 | 0.92752              | 143.12               | 264        | 36890 | 0.62909              | 166.14               |
| 159        | 53450 | 0.91149              | 145.11               | 269        | 36220 | 0.61767              | 166.34               |
| 164        | 52430 | 0.89410              | 146.72               | 274        | 35640 | 0.60778              | 166.71               |
| 169        | 51460 | 0.87756              | 148.57               | 279        | 34910 | 0.59533              | 166.16               |
| 174        | 50620 | 0.86323              | 150.38               | 284        | 34500 | 0.58834              | 167.26               |
| 179        | 49860 | 0.85027              | 152.45               | 289        | 33810 | 0.57657              | 166.69               |
| 184        | 48970 | 0.83510              | 153.74               | 294        | 33180 | 0.56583              | 166.52               |
| 189        | 48180 | 0.82162              | 155.37               | 299        | 32690 | 0.55747              | 166.85               |
| 194        | 47290 | 0.80645              | 156.53               | 304        | 32440 | 0.55321              | 168.34               |
| 199        | 46480 | 0.79263              | 157.89               | 309        | 32040 | 0.54638              | 169.00               |
| 204        | 45620 | 0.77797              | 158.94               | 314        | 31570 | 0.53837              | 169.10               |
| 209        | 44910 | 0.76586              | 160.29               | 319        | 30790 | 0.52507              | 167.55               |
| 214        | 44100 | 0.75205              | 161.09               | 324        | 30320 | 0.51705              | 167.58               |
| 219        | 43270 | 0.73789              | 161.67               | 329        | 29860 | 0.51705              | 167.58               |
| 224        | 42460 | 0.72408              | 162.48               | 334        | 29220 | 0.50921              | 167.58               |

**Table S5.** Double integral and normalized data for **1[3,7]**.

| Temp<br>/K | DI    | DI/DI <sub>120</sub> | DI <sub>rel</sub> •T | Temp<br>/K | DI    | DI/DI <sub>120</sub> | DI <sub>rel</sub> •T |
|------------|-------|----------------------|----------------------|------------|-------|----------------------|----------------------|
| 120        | 56130 | 1                    | 119.90               | 224        | 36900 | 0.6574               | 147.46               |
| 124        | 55710 | 0.99252              | 123.37               | 229        | 36080 | 0.64279              | 147.33               |
| 130        | 54220 | 0.96597              | 125.09               | 234        | 35570 | 0.63371              | 148.48               |
| 135        | 53310 | 0.94976              | 127.74               | 239        | 34840 | 0.6207               | 148.53               |
| 139        | 52210 | 0.93016              | 129.66               | 244        | 34130 | 0.60805              | 148.49               |
| 144        | 51330 | 0.91448              | 132.05               | 249        | 33390 | 0.59487              | 148.30               |
| 149        | 50190 | 0.89417              | 133.59               | 254        | 32890 | 0.58596              | 149.01               |
| 154        | 49070 | 0.87422              | 134.89               | 259        | 32040 | 0.57082              | 147.96               |
| 159        | 48030 | 0.85569              | 136.31               | 264        | 31690 | 0.56458              | 149.16               |
| 164        | 46800 | 0.83378              | 136.91               | 269        | 30990 | 0.55211              | 148.63               |
| 169        | 45840 | 0.81668              | 138.18               | 274        | 30620 | 0.54552              | 149.64               |
| 174        | 45060 | 0.80278              | 139.92               | 279        | 29620 | 0.5277               | 147.33               |
| 179        | 43940 | 0.78283              | 140.36               | 284        | 29410 | 0.52396              | 148.91               |
| 184        | 43020 | 0.76644              | 141.25               | 289        | 28810 | 0.51327              | 148.44               |
| 189        | 42340 | 0.75432              | 142.79               | 294        | 28200 | 0.50241              | 147.81               |
| 194        | 41380 | 0.73722              | 143.24               | 299        | 27680 | 0.49314              | 147.55               |
| 199        | 40680 | 0.72475              | 144.44               | 304        | 27070 | 0.48227              | 146.71               |
| 204        | 39900 | 0.71085              | 145.23               |            |       |                      |                      |
| 209        | 39280 | 0.6998               | 146.47               |            |       |                      |                      |

The  $DI_{rel}T(T)$  data was modeled using  $\chi_{tot}T$ , which is a sum of paramagnetic contributions from *syn* and *anti* conformers scaled by mole fraction  $x$  at the equilibrium (eq S1). Paramagnetic behavior of each conformer is described by a modified Bleaney-Bowers<sup>10</sup> formalism (eq S2) and based on Heisenberg Hamiltonian for two spin 1/2 system,

$$\hat{H} = -2J\hat{S}_1 \cdot \hat{S}_2.$$

$$\chi_{tot}T = x_{anti} \cdot \chi_{anti}T + x_{syn} \cdot \chi_{syn}T \quad (\text{eq. S1})$$



$$\chi \cdot T = \frac{Ng^2\mu_B^2}{k} \left( \frac{2}{3+e^{-\frac{2J}{kT}}} \right) (1 - \rho) + \frac{Ng^2\mu_B^2}{2k} \rho \quad \text{eq S2}$$

For numeral fitting to the eq S1, a three-parameter equation S3 was used.

$$DI_{rel} \times T = m1 \left( \frac{2}{3+e^{-\frac{m2}{m0}}} \right) \times x_{syn} + m1 \left( \frac{2}{3+e^{-\frac{m3}{m0}}} \right) \times x_{anti} + m4 \quad \text{eq S3}$$

For numeral fitting equation S3 the following parameters were used:

$DI_{rel} \times T$  – product of double integral and temperature determined experimentally and listed in Tables S4 and S5.

$m0 = T / K$

$m1, m4$  – free parameters

$m2, m3 = \frac{2J}{k_B} / K$

$x_{syn}$  and  $x_{anti}$  are mole fractions of conformers at thermal equilibrium at  $T = 298$  determined by DFT (*vide infra*) and listed in Table S6.

Fitting to the four-parameter function S3 gave initial values for the parameters  $m1$ – $m4$ . Subsequently, parameter  $m3$  for the antiferromagnetic component was fixed and varied in a small range to maximize the correlation parameter  $r^2$ . Results of curve fitting are shown in Figures S29 and S30 and in Table S6. A graphical comparison of the experimental and DFT-derived  $\Delta E_{S-T}$  values is shown in Figure S31.

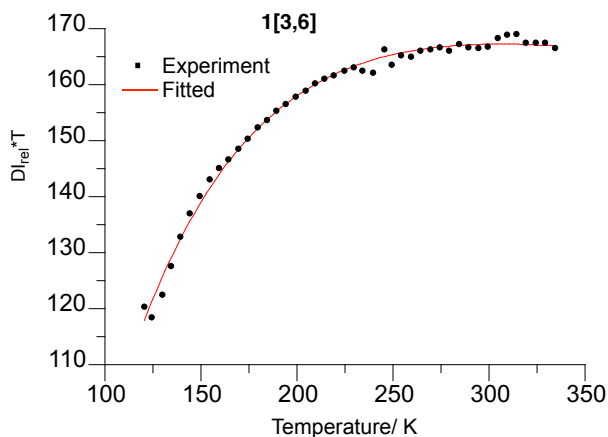

**Figure S29.** Determination of  $\Delta E_{ST}$  for 5.2 mM diradical **1[3,6]** in polystyrene. Plot of  $DI_{rel} \cdot T$  vs  $T$ , in the temperature range 120–334 K. Red line represents the best fitting function (eq. S3) with the following parameters:  $m1 = 1278(56)$ ,  $m2 = 2J/k_B = 515(24)$  K,  $m3 = 2J/k_B = -224$ ,  $m4 = -532(29)$ ,  $r^2 = 0.994$ .

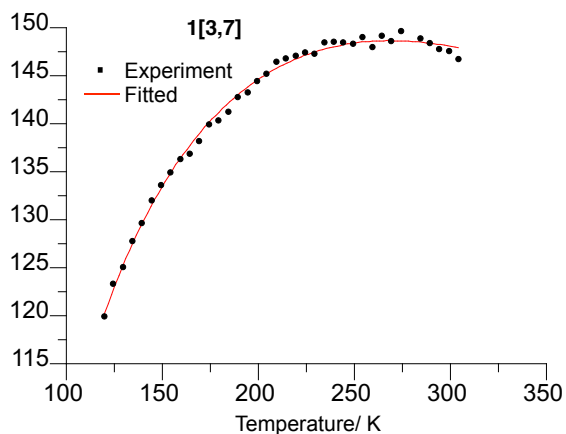

**Figure S30.** Determination of  $\Delta E_{ST}$  for 5.2 mM diradical **1[3,7]** in polystyrene. Plot of  $DI_{rel} \cdot T$  vs  $T$  in the temperature range 120–304 K. Red line represents the best fitting function (eq. S3) with the following parameters:  $m_1 = 2197(43)$ ,  $m_2 = 2J/k_B = 894(13)$  K,  $m_3 = 2J/k_B = -51$ ,  $m_4 = -1097(24)$ ,  $r^2 = 0.996$ .

**Table S6.** The singlet-triplet energy gap  $\Delta E_{S-T}(2J)$  for diradicals **1[3,n]** determined by fitting to the Bleaney-Bowers equation eq S3.

|               | $x_{syn}^a$ | $x_{anti}^a$ | $\Delta E_{S-T}(syn)$<br>/kcal/mol | $\Delta E_{S-T}(anti)$<br>/kcal/mol |
|---------------|-------------|--------------|------------------------------------|-------------------------------------|
| <b>1[3,6]</b> | 0.3425      | 0.6575       | -0.45                              | 1.02(5)                             |
| <b>1[3,7]</b> | 0.50        | 0.50         | 1.78(3)                            | -0.10                               |

<sup>a</sup> Mole fraction obtained from  $K_{298}$  calculated with DFT methods.

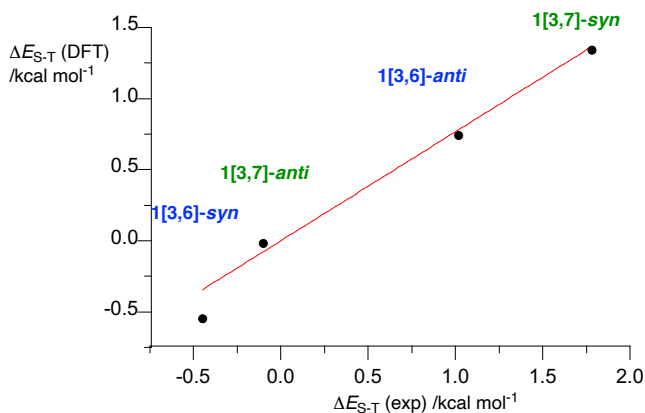

**Figure S31.** A correlation of experimental and DFT-derived (*vide infra*) singlet triplet gaps for two conformers of **1[3,6]** and **1[3,7]**. Best fit line:  $\Delta E_{S-T}(DFT) = 0.77(6) \times \Delta E_{S-T}(exp)$ .

Simulation of triplet EPR spectra for diradicals **1[3,n]** was conducted using the *pepper* module in *EasySpin* (Matlab),<sup>11</sup> and results are shown in Figures S32 and S33. Assuming an isotropic  $g$  value, the resulting absolute values of zero-field splitting parameters ( $zfp$ ),  $|D/hc|$  and  $|E/hc|$ , are shown in Table S7. Assuming a point dipole approximation, the mean distance between the spin centers was estimated using equation S4.

$$r = ((D/2g) \times 7.19 \times 10^{-5})^{-1/3} \quad \text{eq S4}$$

where  $D$  (in gauss) is the fitting parameter in the simulated EPR spectrum.

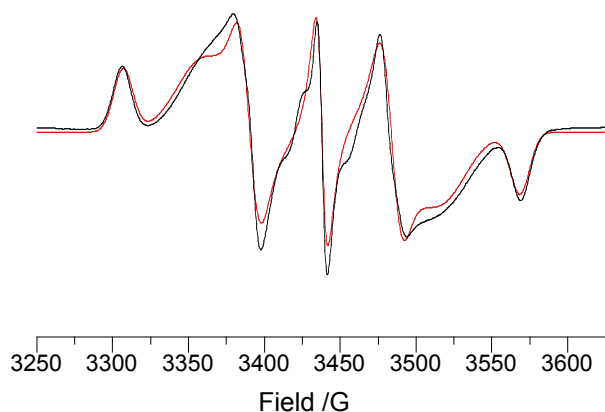

**Figure S32.** A complete set of fitting parameters for EPR spectrum of 5.2 mM diradical **1[3,6]** in polystyrene (124 K,  $\nu = 9.644$  GHz). Simulation  $|\Delta m_S| = 1$  region (*pepper*, *EasySpin*, rmsd = 0.0607234): Component A, weight = 1.0000,  $S = 1$ ,  $D = 366.09$  MHz,  $E = 32.07$  MHz,  $g_{\text{iso}} = 2.00431$ ;  $H$ -strain (MHz):  $H_x = 38.3555$ ,  $H_y = 102.718$ ,  $H_z = 41.1344$ ;  $D$ -strain (MHz):  $D = 80.00$ ,  $E = 30.00$ ; component B,  $S = 1/2$ , weight = 0.29567,  $g_{\text{iso}} = 2.00428$ ,  $H$ -strain (MHz):  $H_x = 50.00$ ,  $H_y = 50.00$ ,  $H_z = 87.00$ .

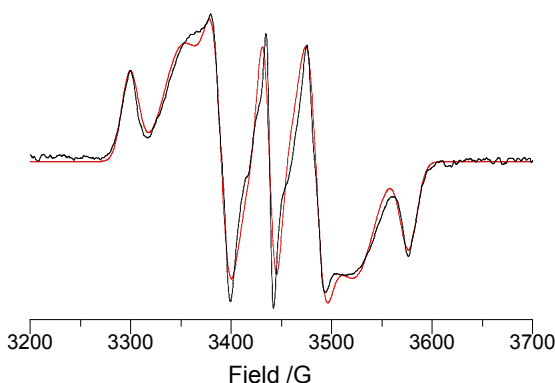

**Figure S33.** A complete set of fitting parameters for EPR spectrum of 5.2 mM diradical **1[3,7]** in polystyrene (124 K,  $\nu = 9.644$  GHz). Simulation  $|\Delta m_S| = 1$  region (*pepper*, *EasySpin*, rmsd = 0.0759452): Component A, weight = 1.0000,  $S = 1$ ,  $D = 388.43$  MHz,  $E = 39.03$  MHz,  $g_{\text{iso}} = 2.00417$ ,  $H$ -strain (MHz):  $H_x = 52.711$ ,  $H_y = 110.397$ ,  $H_z = 54.4579$ ;  $D$ -strain (MHz):  $D = 80.00$ ,  $E = 30.00$ ; component B,  $S = 1/2$ , weight = 0.216519,  $g_{\text{iso}} = 2.00416$ ;  $H$ -strain (MHz):  $H_x = 50.00$ ,  $H_y = 50.00$ ,  $H_z = 87.00$ .

**Table S7.** Zero-field splitting parameters simulated for diradicals **1[3,n]**.

| diradical     | Matrix,<br>temp/ K | $ D/hc $<br>/cm <sup>-1</sup> | $ E/hc $<br>/cm <sup>-1</sup> | $g_{\text{iso}}$ | $r^a$<br>/Å |
|---------------|--------------------|-------------------------------|-------------------------------|------------------|-------------|
| <b>1[3,6]</b> | PS, 124            | $1.22 \times 10^{-2}$         | $1.07 \times 10^{-3}$         | 2.0043           | 5.97        |
| <b>1[3,7]</b> | PS, 124            | $1.29 \times 10^{-2}$         | $1.30 \times 10^{-3}$         | 2.0042           | 5.86        |

<sup>a</sup> Calculated using equation S4.

## 7. Computational details

### a) geometry optimization

Quantum-mechanical calculations were carried out using Gaussian 09 suite of programs.<sup>12</sup> Geometry optimizations of the open-shell singlet and the triplet state of each diradical were undertaken at the UB3LYP/6-311G(d,p) level of theory in benzene dielectric medium (PCM model,<sup>13</sup> the SCRF(solvent=Benzene) keyword) using default convergence criteria and no symmetry constrains. All calculations involving the open-shell singlet (OSS) used the “guess(mix, always)” keyword (the broken symmetry, BS, approach). Limited conformational search conducted for triplet diradicals **1[3,6]** and **1[3,7]** determined their two main minima with the Ph groups in *syn* and *anti* relative orientations and the *t*-Bu group nearly eclipsing the N(2) atom. The optimized geometries of the triplet species were used as starting points for geometry optimization of the OSS species. The resulting geometries for two conformers of **1[3,6]** and **1[3,7]** in the triplet state are shown in Figures S34 and S35, while Figures S36 and S37 show spin density maps for the T and OSS sates of the two diradicals. Frequency calculations were performed to verify the nature of the stationary points and to obtain thermodynamic corrections for each species. Finally, the SCF energy of each species was obtained from single point calculations at the UB3LYP/6-311+G(d,p) level in benzene dielectric medium (the UB3LYP/6-311+G(d,p) // UB3LYP/6-311G(d,p) method).

This protocol was used to obtained geometry optimized structures for diradicals in series **I[3,6]** and **I[3,7]**.

Also the same method (UB3LYP/6-311+G(d,p) // UB3LYP/6-311G(d,p) in benzene dielectric medium) was used to calculate spin distribution in monoradical models.

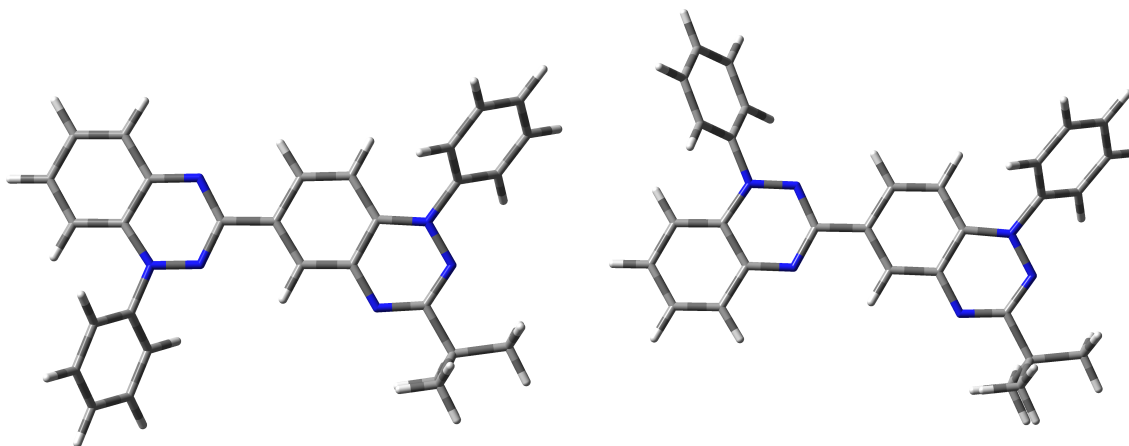

**Figure S34.** Optimized geometries for triplet diradical **1[3,6]-T** in the *anti* (left) and *syn* conformation (right).

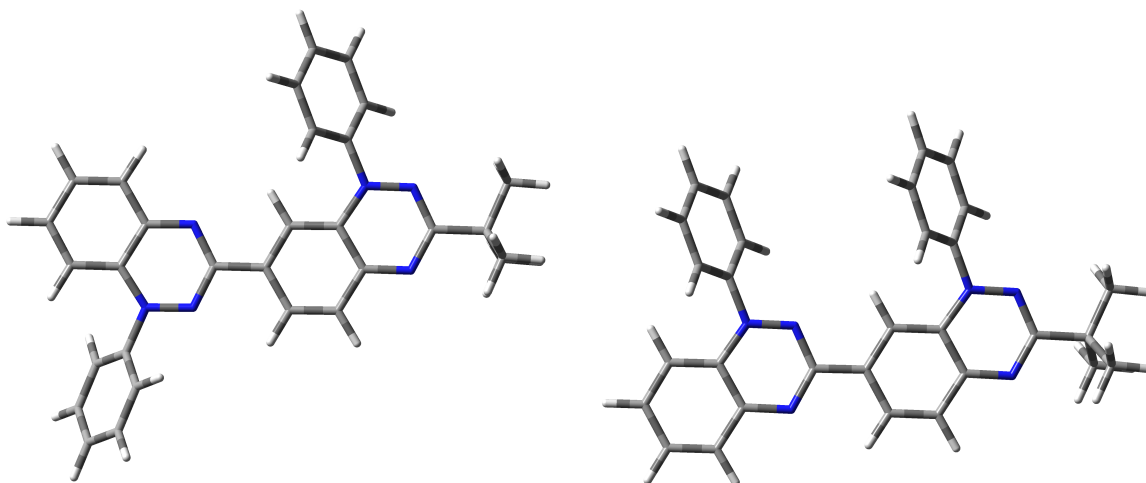

**Figure S35.** Optimized geometries for triplet diradical **1[3,7]-T** in the *anti* (left) and *syn* conformation (right).

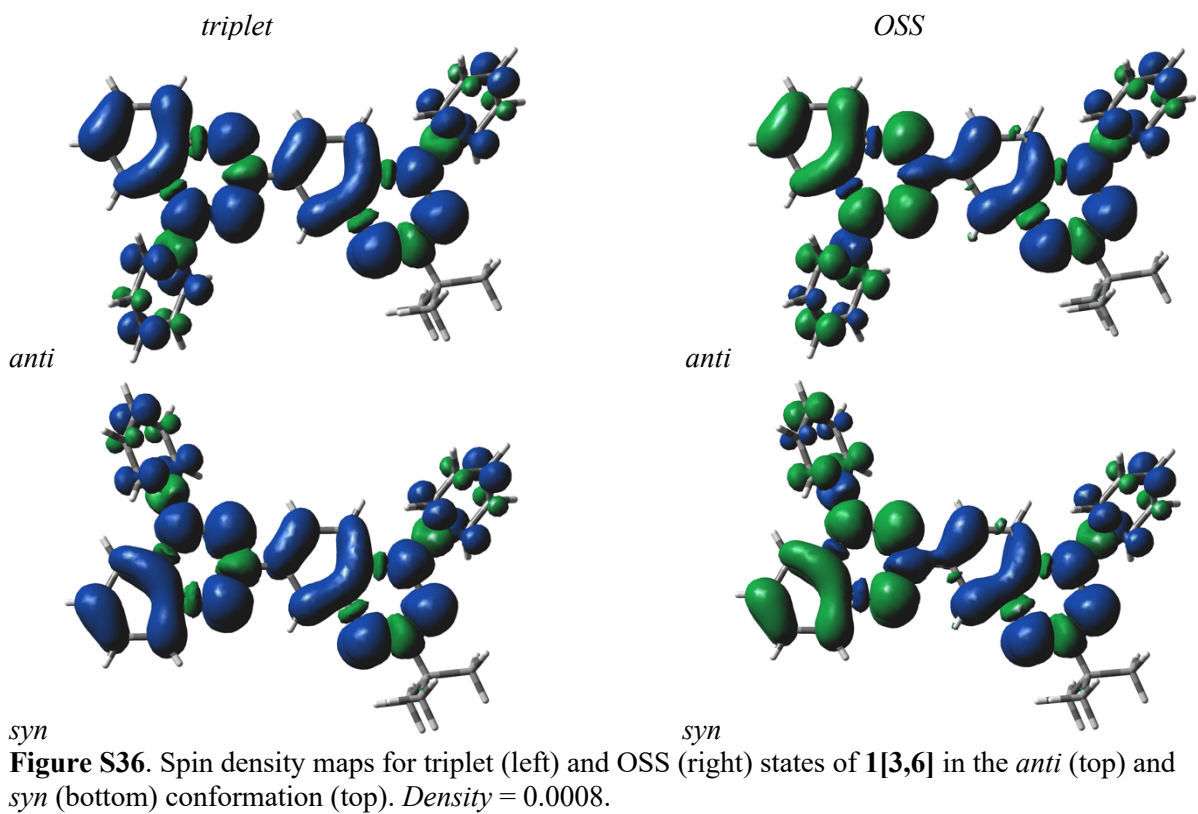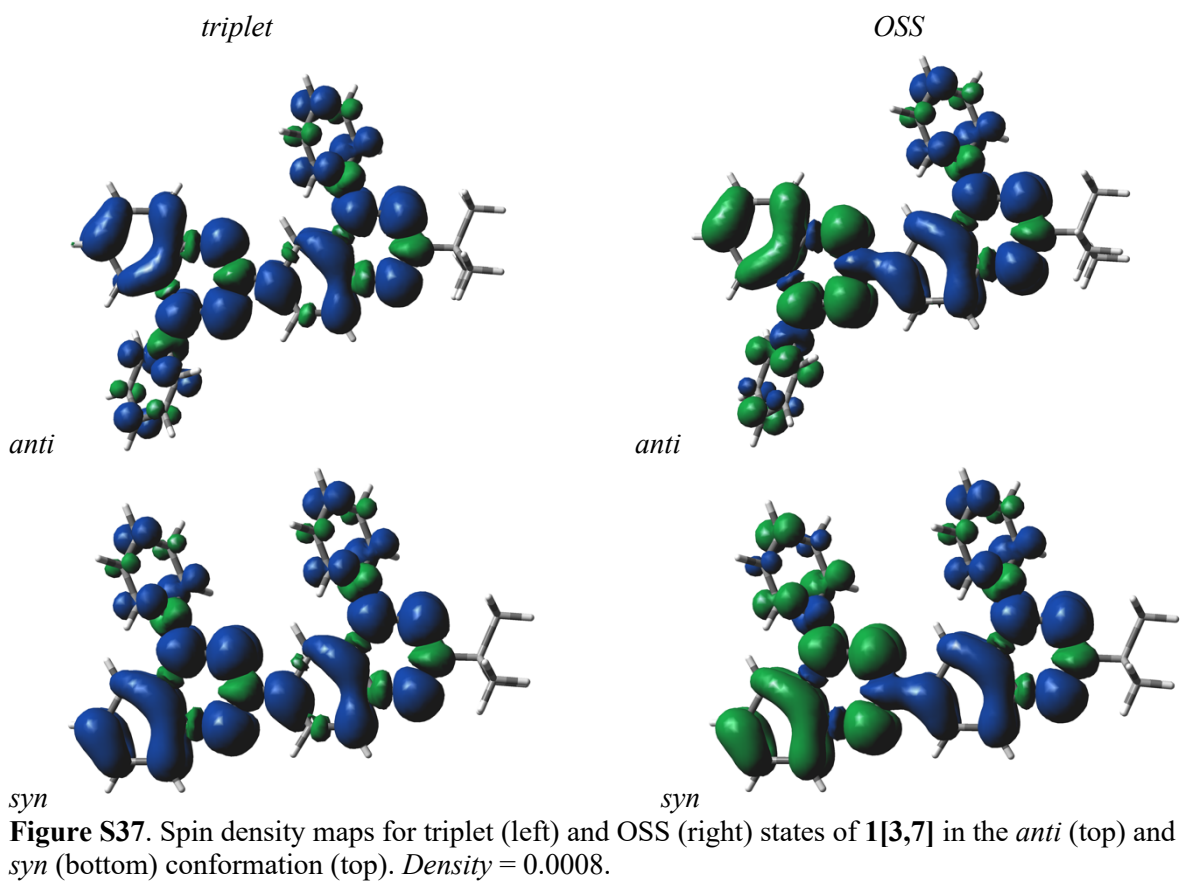

**b) intramolecular spin-spin exchange interactions**

Adiabatic singlet-triplet energy gaps,  $\Delta E_{S-T}$ , for diradicals **1[3,n]** were calculated as a difference of  $E_S$  and  $E_T$  energies calculated using the Yamaguchi formalism<sup>14</sup> (eq S5) at the UB3LYP/6-311+G(d,p) level of theory and corrected for ZPE.

$$\Delta E_{S-T} = 2J = 2 \frac{E_{BS} - E_T}{\langle S^2 \rangle_T - \langle S^2 \rangle_{BS}} \quad \text{eq. S5}$$

where  $\langle S^2 \rangle$  is the total spin angular momentum before spin annihilation. Energies of the triplet ( $E_T$ ) and broken symmetry singlet ( $E_{BS}$ ) were obtained as  $E_{SCF}$  at the UB3LYP/6-311+G(d,p) // UB3LYP/6-311G(d,p) level of theory in benzene dielectric medium and corrected by ZPEC. The results are shown in Table S8. The same protocol was used for calculations of  $\Delta E_{S-T}$  values for derivatives **1[3,6]** and **1[3,7]** and results are shown in Tables S9 and S10.

**Table S8.** DFT calculated energies, thermodynamic corrections and S–T gaps for diradicals **1[3,n]**.

| diradical     | $E_{SCF}^a$<br>/Ha | ZPEC <sup>b</sup><br>/Ha | $H$ corr <sup>b</sup><br>/Ha | $G_{298}$ corr <sup>b</sup><br>/Ha | $\langle S^2 \rangle^b$ | $\Delta E_{S-T}^c$<br>/cal mol <sup>-1</sup> |
|---------------|--------------------|--------------------------|------------------------------|------------------------------------|-------------------------|----------------------------------------------|
| <b>1[3,6]</b> |                    |                          |                              |                                    |                         |                                              |
| <i>anti-S</i> | -1487.6728593      | 0.495123                 | 0.525595                     | 0.432475                           | 1.0295                  |                                              |
| <i>anti-T</i> | -1487.6734961      | 0.495172                 | 0.525635                     | 0.431551                           | 2.0281                  | 738.7                                        |
| <i>syn-S</i>  | -1487.6733490      | 0.495191                 | 0.525641                     | 0.432718                           | 0.9980                  |                                              |
| <i>syn-T</i>  | -1487.6728601      | 0.495153                 | 0.525624                     | 0.431530                           | 2.0282                  | -549.3                                       |
| <b>1[3,7]</b> |                    |                          |                              |                                    |                         |                                              |
| <i>anti-S</i> | -1487.6740744      | 0.495181                 | 0.525672                     | 0.432163                           | 0.9899                  |                                              |
| <i>anti-T</i> | -1487.6740154      | 0.495138                 | 0.525649                     | 0.430959                           | 2.0321                  | -19.3                                        |
| <i>syn-S</i>  | -1487.6731960      | 0.495075                 | 0.525589                     | 0.432128                           | 1.0247                  |                                              |
| <i>syn-T</i>  | -1487.6743138      | 0.495116                 | 0.525618                     | 0.431263                           | 2.0323                  | 1341.2                                       |

<sup>a</sup> Obtained at the UB3LYP/6-311+G(d,p) // UB3LYP/6-311G(d,p) level of theory in benzene dielectric medium.

<sup>b</sup> Obtained at the UB3LYP/6-311G(d,p) level of theory in benzene dielectric medium. <sup>c</sup> Obtained using eq S5.

**Table S9.** DFT calculated energies, thermodynamic corrections and S–T gaps for diradicals I[3,6].

| diradical                                               | $E_{SCF}^a$<br>/Ha | ZPEC <sup>b</sup><br>/Ha | $H$ corr <sup>b</sup><br>/Ha | $G_{298}$ corr <sup>b</sup><br>/Ha | $\langle S^2 \rangle^b$ | $\Delta E_{S-T}^c$<br>/cal mol <sup>-1</sup> |
|---------------------------------------------------------|--------------------|--------------------------|------------------------------|------------------------------------|-------------------------|----------------------------------------------|
| <b>X = H, Y = H, Ar = Ph</b>                            |                    |                          |                              |                                    |                         |                                              |
| <i>anti-S</i>                                           | -1330.3703760      | 0.384174                 | 0.408815                     | 0.328250                           | 1.0295                  |                                              |
| <i>anti-T</i>                                           | -1330.3710244      | 0.384220                 | 0.408853                     | 0.327278                           | 2.0285                  | 756.3                                        |
| <i>syn-S</i>                                            | -1330.3707825      | 0.384171                 | 0.408817                     | 0.328144                           | 1.0001                  |                                              |
| <i>syn-T</i>                                            | -1330.3703720      | 0.384138                 | 0.408805                     | 0.326943                           | 2.0285                  | -461.3                                       |
| <b>X = H, Y = CF<sub>3</sub>, Ar = Ph</b>               |                    |                          |                              |                                    |                         |                                              |
| <i>anti-S</i>                                           | -1667.516041       | 0.388174                 | 0.416607                     | 0.326226                           | 1.0293                  |                                              |
| <i>anti-T</i>                                           | -1667.516684       | 0.38822                  | 0.416648                     | 0.325219                           | 2.0281                  | 750.1                                        |
| <i>syn-S</i>                                            | -1667.516391       | 0.388215                 | 0.416625                     | 0.326587                           | 0.9993                  |                                              |
| <i>syn-T</i>                                            | -1667.515975       | 0.388182                 | 0.416614                     | 0.325417                           | 2.0282                  | -467.2                                       |
| <b>X = H, Y = NMe<sub>2</sub>, Ar = Ph</b>              |                    |                          |                              |                                    |                         |                                              |
| <i>anti-S</i>                                           | -1464.388088       | 0.455983                 | 0.485443                     | 0.393863                           | 1.0263                  |                                              |
| <i>anti-T</i>                                           | -1464.388888       | 0.456014                 | 0.485477                     | 0.392867                           | 2.0280                  | 963.1                                        |
| <i>syn-S</i>                                            | -1464.388697       | 0.455913                 | 0.485457                     | 0.393252                           | 0.9955                  |                                              |
| <i>syn-T</i>                                            | -1464.388411       | 0.455909                 | 0.485453                     | 0.392206                           | 2.0279                  | -342.1                                       |
| <b>X = CF<sub>3</sub>, Y = NMe<sub>2</sub>, Ar = Ph</b> |                    |                          |                              |                                    |                         |                                              |
| <i>anti-S</i>                                           | -1801.537921       | 0.460238                 | 0.493515                     | 0.391498                           | 1.0244                  |                                              |
| <i>anti-T</i>                                           | -1801.538725       | 0.460317                 | 0.493579                     | 0.390645                           | 2.0281                  | 907.2                                        |
| <i>syn-S</i>                                            | -1801.538752       | 0.460244                 | 0.493519                     | 0.391577                           | 0.9819                  |                                              |
| <i>syn-T</i>                                            | -1801.538131       | 0.460176                 | 0.4935                       | 0.389823                           | 2.0280                  | -663.2                                       |
| <b>X = H, Y = H, Ar = 2-Pyridyl</b>                     |                    |                          |                              |                                    |                         |                                              |
| <i>anti-S</i>                                           | -1362.461515       | 0.360908                 | 0.385208                     | 0.305266                           | 1.0322                  |                                              |
| <i>anti-T</i>                                           | -1362.461998       | 0.360942                 | 0.385235                     | 0.304307                           | 2.0300                  | 564.4                                        |
| <i>syn-S</i>                                            | -1362.461475       | 0.360824                 | 0.385158                     | 0.304762                           | 1.0108                  |                                              |
| <i>syn-T</i>                                            | -1362.461181       | 0.360792                 | 0.385146                     | 0.303516                           | 2.0301                  | -322.5                                       |
| <b>X = H, Y = H, Ar = 4-Me<sub>2</sub>NPh</b>           |                    |                          |                              |                                    |                         |                                              |
| <i>anti-S</i>                                           | -1598.381057       | 0.52888                  | 0.56273                      | 0.460176                           | 1.0274                  |                                              |
| <i>anti-T</i>                                           | -1598.381754       | 0.528955                 | 0.562782                     | 0.459345                           | 2.0272                  | 780.4                                        |
| <i>syn-S</i>                                            | -1598.381566       | 0.528936                 | 0.562708                     | 0.460823                           | 0.9939                  |                                              |
| <i>syn-T</i>                                            | -1598.381098       | 0.528894                 | 0.56269                      | 0.459630                           | 2.0274                  | -517.2                                       |

<sup>a</sup> Obtained at the UB3LYP/6-311+G(d,p) // UB3LYP/6-311G(d,p) level of theory in benzene dielectric medium.

<sup>b</sup> Obtained at the UB3LYP/6-311G(d,p) level of theory in benzene dielectric medium. <sup>c</sup> Obtained using eq S5.



**Table S10.** DFT calculated energies, thermodynamic corrections and S–T gaps for diradicals I[3,7].

| diradical                                               | $E_{SCF}^a$<br>/Ha | ZPEC <sup>b</sup><br>/Ha | $H$ corr <sup>b</sup><br>/Ha | $G_{298}$ corr <sup>b</sup><br>/Ha | $\langle S^2 \rangle^b$ | $\Delta E_{S-T}^c$<br>/cal mol <sup>-1</sup> |
|---------------------------------------------------------|--------------------|--------------------------|------------------------------|------------------------------------|-------------------------|----------------------------------------------|
| <b>X = H, Y = H, Ar = Ph</b>                            |                    |                          |                              |                                    |                         |                                              |
| <i>anti-S</i>                                           | -1330.371485       | 0.384166                 | 0.408813                     | 0.328229                           | 0.9926                  |                                              |
| <i>anti-T</i>                                           | -1330.371416       | 0.384116                 | 0.408787                     | 0.327043                           | 2.0323                  | -23                                          |
| <i>syn-S</i>                                            | -1330.370663       | 0.384163                 | 0.408812                     | 0.328207                           | 1.0253                  |                                              |
| <i>syn-T</i>                                            | -1330.371782       | 0.384188                 | 0.408834                     | 0.327215                           | 2.0327                  | 1362.5                                       |
| <b>X = H, Y = CF<sub>3</sub>, Ar = Ph</b>               |                    |                          |                              |                                    |                         |                                              |
| <i>anti-S</i>                                           | -1667.517079       | 0.388252                 | 0.416682                     | 0.326135                           | 1.0249                  |                                              |
| <i>anti-T</i>                                           | -1667.517082       | 0.388204                 | 0.416656                     | 0.324983                           | 2.0324                  | 63                                           |
| <i>syn-S</i>                                            | -1667.516200       | 0.388188                 | 0.416636                     | 0.325915                           | 1.0249                  |                                              |
| <i>syn-T</i>                                            | -1667.517308       | 0.388216                 | 0.416656                     | 0.325025                           | 2.0327                  | 1344                                         |
| <b>X = H, Y = NMe<sub>2</sub>, Ar = Ph</b>              |                    |                          |                              |                                    |                         |                                              |
| <i>anti-S</i>                                           | -1464.389944       | 0.456124                 | 0.485588                     | 0.393924                           | 0.9930                  |                                              |
| <i>anti-T</i>                                           | -1464.389623       | 0.456108                 | 0.485572                     | 0.392863                           | 2.0279                  | 371                                          |
| <i>syn-S</i>                                            | -1464.389069       | 0.455966                 | 0.485515                     | 0.393237                           | 1.0248                  |                                              |
| <i>syn-T</i>                                            | -1464.389866       | 0.456038                 | 0.485538                     | 0.392683                           | 2.0282                  | 906                                          |
| <b>X = CF<sub>3</sub>, Y = NMe<sub>2</sub>, Ar = Ph</b> |                    |                          |                              |                                    |                         |                                              |
| <i>anti-S</i>                                           | -1801.540168       | 0.460355                 | 0.493585                     | 0.391944                           | 0.9793                  |                                              |
| <i>anti-T</i>                                           | -1801.539492       | 0.460309                 | 0.493564                     | 0.390507                           | 2.0274                  | -754                                         |
| <i>syn-S</i>                                            | -1801.538959       | 0.460168                 | 0.493541                     | 0.390615                           | 1.023                   |                                              |
| <i>syn-T</i>                                            | -1801.539748       | 0.460293                 | 0.493595                     | 0.390234                           | 2.0278                  | 829                                          |
| <b>X = H, Y = H, Ar = 2-Pyridyl</b>                     |                    |                          |                              |                                    |                         |                                              |
| <i>anti-S</i>                                           | -1362.461858       | 0.360872                 | 0.385171                     | 0.305210                           | 1.0043                  |                                              |
| <i>anti-T</i>                                           | -1362.462122       | 0.360836                 | 0.385152                     | 0.304067                           | 2.0354                  | 365                                          |
| <i>syn-S</i>                                            | -1362.461027       | 0.36085                  | 0.385158                     | 0.305225                           | 1.0275                  |                                              |
| <i>syn-T</i>                                            | -1362.462099       | 0.360879                 | 0.385185                     | 0.304178                           | 2.036                   | 1298                                         |
| <b>X = H, Y = H, Ar = 4-Me<sub>2</sub>NPh</b>           |                    |                          |                              |                                    |                         |                                              |
| <i>anti-S</i>                                           | -1598.382188       | 0.528702                 | 0.562606                     | 0.459825                           | 0.9863                  |                                              |
| <i>anti-T</i>                                           | -1598.381909       | 0.528662                 | 0.562578                     | 0.458717                           | 2.0299                  | -287.5                                       |
| <i>syn-S</i>                                            | -1598.381328       | 0.528912                 | 0.562666                     | 0.461045                           | 1.0242                  |                                              |
| <i>syn-T</i>                                            | -1598.382285       | 0.528943                 | 0.562688                     | 0.460121                           | 2.0302                  | 1155                                         |

<sup>a</sup> Obtained at the UB3LYP/6-311+G(d,p) // UB3LYP/6-311G(d,p) level of theory in benzene dielectric medium.

<sup>b</sup> Obtained at the UB3LYP/6-311G(d,p) level of theory in benzene dielectric medium. <sup>c</sup> Obtained using eq S5.

**c) ratio of conformers**

The ratio of conformers  $K_{298} = [anti]/[syn]$  at standard temperature (298 K) was calculated using equation S6:

$$-298 \times R \ln K_{298} = (G_{298}anti - G_{298}syn) \quad \text{eq S6}$$

The results are shown in Figure 10 in the main text.

It was assumed that the ratio  $K_{298}$  does not change upon cooling in rigid polystyrene solutions. Population of states at 298 K for each diradical was calculated using  $K_{298}$  and ratio of OSS and T states was obtained from  $\Delta E_{S-T}$  (Tables S9 and S10) and the general formula S6. Results are shown in Table S11.

**Table S11.** Population of states at 298 K.<sup>a</sup>

| Diradical     | $K_{298}$ | <i>anti</i> -T | <i>anti</i> -OSS | <i>syn</i> -T | <i>syn</i> -OSS |
|---------------|-----------|----------------|------------------|---------------|-----------------|
| <b>1[3,6]</b> | 1.92      | 0.513          | 0.147            | 0.096         | 0.244           |
| <b>1[3,7]</b> | 1.01      | 0.246          | 0.254            | 0.453         | 0.047           |

<sup>a</sup> mole fraction.

Total populations of singlet ( $\eta_{OSS}$ ) and triplet ( $\eta_T$ ) states for each isomer in a function of temperature was calculated with equations S7 and S8, respectively, using DFT-derived thermodynamic parameters and experimentally determined  $\Delta E_{S-T}$  energies listed in Table S12.

$$\eta_{OSS}(T) = x_{anti} \times \frac{K_{ST(a)}}{K_{ST(a)} + 1} + x_{syn} \times \frac{K_{ST(s)}}{K_{ST(s)} + 1} = \frac{K_{a/s}}{K_{a/s} + 1} \times \frac{K_{ST(a)}}{K_{ST(a)} + 1} + \frac{1}{K_{a/s} + 1} \times \frac{K_{ST(s)}}{K_{ST(s)} + 1}$$

$$\eta_{OSS}(T) = \frac{1}{K_{a/s} + 1} \times \left[ \frac{K_{a/s} K_{ST(a)}}{K_{ST(a)} + 1} + \frac{K_{ST(s)}}{K_{ST(s)} + 1} \right] \quad \text{eq S7}$$

$$\eta_T(T) = x_{anti} \times \frac{1}{K_{ST(a)} + 1} + x_{syn} \times \frac{1}{K_{ST(s)} + 1} = \frac{K_{a/s}}{K_{a/s} + 1} \times \frac{1}{K_{ST(a)} + 1} + \frac{1}{K_{a/s} + 1} \times \frac{1}{K_{ST(s)} + 1}$$

$$\eta_T(T) = \frac{1}{K_{a/s} + 1} \times \left[ \frac{K_{a/s}}{K_{ST(a)} + 1} + \frac{1}{K_{ST(s)} + 1} \right] \quad \text{eq S8}$$

where

*syn* → *anti*

$K_{a/s} = e^{-\frac{\Delta H_{a/s} - T\Delta S_{a/s}}{RT}}$  and  $\Delta H_{a/s} = H_{anti} - H_{syn}$  and  $\Delta S_{a/s} = S_{anti} - S_{syn}$  determined from DFT calculations

T → OSS

$K_{ST} = e^{-\frac{\Delta E_{ST}}{RT}}$  and  $\Delta E_{ST} = E_{OSS} - E_T$  determined from experiment

**Table S12.** Parameters used to determine temperature dependent population of OSS and T states.

| Diradical | $\Delta H_{a/s}^a$<br>/cal mol <sup>-1</sup> | $\Delta S_{a/s}^a$<br>cal mol <sup>-1</sup> K <sup>-1</sup> | $\Delta E_{S-T(a)}^b$<br>/cal mol <sup>-1</sup> | $\Delta E_{S-T(s)}^b$<br>/cal mol <sup>-1</sup> |
|-----------|----------------------------------------------|-------------------------------------------------------------|-------------------------------------------------|-------------------------------------------------|
| 1[3,6]    | -392                                         | -0.021                                                      | 1020                                            | -450                                            |
| 1[3,7]    | 207                                          | 0.703                                                       | -100                                            | 1780                                            |

<sup>a</sup> Obtained at the UB3LYP/6-311+G(d,p) // UB3LYP/6-311G(d,p) level of theory in benzene dielectric medium.

<sup>b</sup> determined from the experiment.

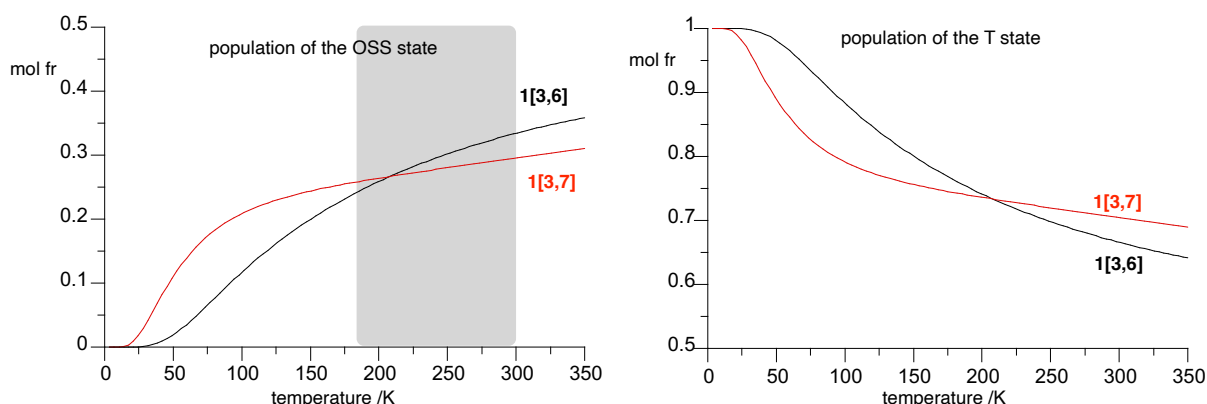**Figure S38.** Profiles of the OSS mole fraction ( $\eta_{\text{OSS}}$ , left) and T mole fraction ( $\eta_{\text{T}}$ , left) in function of temperature using eqs S7 and S8 and data in Table S12. The shaded area is accessible by experiment.

#### *d) activation energy for conformer interconversion*

Transition states for the two isomeric diradicals were located with the QST3 keyword in both the OSS and triplet states in benzene dielectric medium using the UB3LYP/6-311G(d,p) method with default convergence limits. All species exhibited a single imaginary frequency of about  $-27 \text{ cm}^{-1}$  corresponding to the rotation about the central C–C bond and essentially orthogonal orientation of the two heterocyclic rings. For all four TS geometries single point calculations were performed at the UB3LYP/6-311+G(d,p) level. Activation energies were calculated using the single point energies with thermodynamic corrections obtained at the UB3LYP/6-311G(d,p) level of theory. The resulting geometries are shown in Figure S39 and activation energies are listed in Table S13.



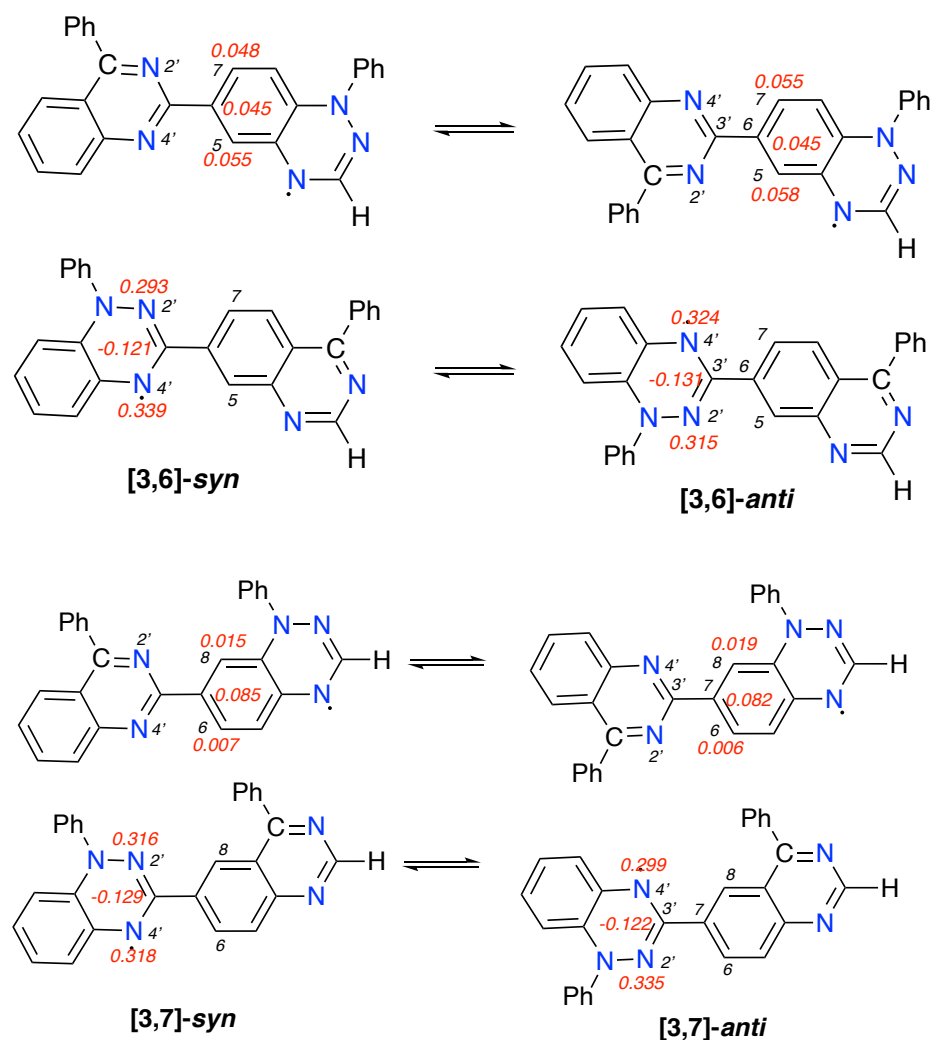

**Figure S40.** Spin density in key positions of two conformers in model monoradicals calculated at the UB3LYP/6-311+G(d,p) // UB3LYP/6-311G(d,p) level of theory in benzene dielectric medium.

#### *f) electronic excitations*

Electronic excitation energies in CH<sub>2</sub>Cl<sub>2</sub> dielectric medium were obtained for derivatives **1**[3,*n*] at the UB3LYP/6-311+G(d,p) // UB3LYP/6-311G(d,p) level of theory using time-dependent<sup>15</sup> DFT method supplied in the Gaussian 09 package. Solvation models in calculations were implemented by PCM model<sup>16</sup> using the SCRF(solvent=CH<sub>2</sub>CL<sub>2</sub>) keyword. The lowest energy excitations with significant probability, classified as  $\pi \rightarrow \pi^*$  transitions, are listed in Table S14. Energies of FMOs involved in the low energy transitions are listed in Table S15.

**Table S14.** Low energy electronic transitions and oscillator strength values for significant excitations in diradicals **1[3,n]**.<sup>a</sup>

| Radical <b>1[3,n]</b> | state | $\pi \rightarrow \pi^*$ /nm (state, <i>f</i> ) |
|-----------------------|-------|------------------------------------------------|------------------------------------------------|------------------------------------------------|------------------------------------------------|
| <b>1[3,6] anti</b>    | T     | 572.9 (S2, 0.094)                              | 478.4 (S3, 0.053)                              | 468.3 (S4, 0.010)                              | 432.5 (S6, 0.032)                              |
|                       | OSS   | 845.6 (S2, 0.004)                              | 552.9 (S3, 0.022)                              | 534.2 (S4, 0.059)                              | 458.5 (S6, 0.035)                              |
| <b>1[3,6] syn</b>     | T     | 623.9 (S1, 0.033)                              | 562.0 (S2, 0.034)                              | 461.4 (S4, 0.039)                              |                                                |
|                       | OSS   | 869.1 (S1, 0.076)                              | 835.6 (S2, 0.020)                              | 561.7 (S3, 0.019)                              | 553.5 (S4, 0.037)                              |
| <b>1[3,7] anti</b>    | T     | 613.0 (S1, 0.032)                              | 559.1 (S2, 0.15)                               | 515.4 (S3, 0.031)                              | 464.3 (S4, 0.055)                              |
|                       | OSS   | 908.7 (S1, 0.074)                              | 562.6 (S3, 0.024)                              | 537.6 (S4, 0.021)                              | 483.8 (S5, 0.067)                              |
| <b>1[3,7] syn</b>     | T     | 571.4 (S2, 0.057)                              | 493.4 (S3, 0.103)                              | 435.5 (S6, 0.083)                              | 435.5 (S6, 0.083)                              |
|                       | OSS   | 973.5 (S1, 0.004)                              | 876.0 (S2, 0.004)                              | 548.9 (S3, 0.034)                              | 485.3 (S5, 0.045)                              |

<sup>a</sup> Obtained with the UB3LYP/6-311+G(d,p) // UB3LYP/6-311G(d,p) method in CH<sub>2</sub>Cl<sub>2</sub> dielectric medium.**Table S15.** Calculated energies for selected MOs.<sup>a</sup>

| Radical <b>1[3,n]</b> | state | $\alpha$ -HOMO-1       | $\alpha$ -HOMO       | $\alpha$ -LUMO       | $\alpha$ -LUMO+1       |
|-----------------------|-------|------------------------|----------------------|----------------------|------------------------|
|                       |       | $\beta$ -HOMO-1<br>/eV | $\beta$ -HOMO<br>/eV | $\beta$ -LUMO<br>/eV | $\beta$ -LUMO+1<br>/eV |
| <b>1[3,6] anti</b>    | T     | -5.059                 | -4.798               | -1.838               | -1.084                 |
|                       | OSS   | -6.589                 | -4.939               | -2.929               | -2.915                 |
| <b>1[3,6] syn</b>     | T     | -5.046                 | -4.789               | -1.852               | -1.090                 |
|                       | OSS   | -6.612                 | -4.861               | -3.084               | -2.728                 |
| <b>1[3,7] anti</b>    | T     | -5.059                 | -4.798               | -1.838               | -1.103                 |
|                       | OSS   | -6.527                 | -4.949               | -3.120               | -2.752                 |
| <b>1[3,7] syn</b>     | T     | -4.969                 | -4.885               | -2.973               | -1.706                 |
|                       | OSS   | -6.550                 | -4.945               | -2.961               | -1.721                 |
|                       |       |                        | -4.852               | -2.992               | -2.897                 |
|                       |       |                        | -4.852               | -2.994               | -1.665                 |
|                       |       |                        | -4.852               | -2.963               | -1.693                 |

<sup>a</sup> Obtained with the UB3LYP/6-311+G(d,p) // UB3LYP/6-311G(d,p) method in CH<sub>2</sub>Cl<sub>2</sub> dielectric medium.

***g) partial output data for TD-DFT calculations***

Excitation energies were calculated with the TD UB3LYP/6-311+G(d,p)//UB3LYP/6-311G(d,p) method in CH<sub>2</sub>Cl<sub>2</sub> dielectric medium. Only the lowest energy excitations are listed along with energies of the relevant MOs.

**1[3,6]-T anti**

Excited State 1: 3.036-A 2.0930 eV 592.36 nm f=0.0009 <S\*\*2>=2.054  
124A ->126A 0.92810  
124A ->129A 0.11279  
124A ->131A -0.11992  
125A ->126A 0.19492  
123B ->124B 0.15025

This state for optimization and/or second-order correction.

Total Energy, E(TD-HF/TD-KS) = -1487.60206305

Copying the excited state density for this state as the 1-particle RhoCI density.

Excited State 2: 3.057-A 2.1643 eV 572.86 nm f=0.0944 <S\*\*2>=2.086  
124A ->126A -0.19433  
125A ->126A 0.92582  
125A ->128A -0.14779  
125A ->129A -0.12036  
125A ->131A 0.16648

Excited State 3: 3.125-A 2.5917 eV 478.38 nm f=0.0526 <S\*\*2>=2.192  
121B ->125B 0.10236  
122B ->125B 0.44594  
123B ->124B -0.53823  
123B ->125B 0.62838

Excited State 4: 3.070-A 2.6475 eV 468.31 nm f=0.0103 <S\*\*2>=2.106  
124A ->126A -0.12746  
124A ->127A -0.18206  
122B ->124B -0.44373  
123B ->124B 0.60895  
123B ->125B 0.53464

Excited State 5: 3.041-A 2.7937 eV 443.80 nm f=0.0059 <S\*\*2>=2.062  
118B ->125B -0.16678  
119B ->124B -0.10358  
119B ->125B 0.22087  
120B ->125B -0.18679  
121B ->124B -0.35916  
121B ->125B 0.79853  
123B ->125B -0.21161

Excited State 6: 3.051-A 2.8664 eV 432.54 nm f=0.0315 <S\*\*2>=2.077  
125A ->126A 0.18713  
125A ->128A 0.81267  
125A ->131A -0.28357  
119B ->125B -0.17402

122B ->125B 0.19327  
123B ->125B -0.26426

Excited State 7: 3.038-A 2.8985 eV 427.76 nm f=0.0046 <S\*\*2>=2.058  
124A ->127A 0.14168  
116B ->124B -0.18578  
117B ->124B -0.34900  
117B ->125B -0.12268  
120B ->124B 0.74646  
120B ->125B 0.28724  
121B ->124B 0.23932  
122B ->124B -0.14827  
123B ->124B -0.16869

Excited State 8: 3.099-A 2.9656 eV 418.07 nm f=0.0711 <S\*\*2>=2.150  
124A ->127A 0.91911  
120B ->124B -0.11300  
123B ->124B 0.13898  
123B ->125B 0.10159

### 1[3,6]-T syn

Excited State 1: 3.037-A 1.9872 eV 623.91 nm f=0.0334 <S\*\*2>=2.056  
124A ->126A 0.24986  
124A ->131A -0.14459  
125A ->126A 0.92518  
123B ->124B -0.13273

This state for optimization and/or second-order correction.

Total Energy, E(TD-HF/TD-KS) = -1487.60549151

Copying the excited state density for this state as the 1-particle RhoCI density.

Excited State 2: 3.062-A 2.2061 eV 562.02 nm f=0.0335 <S\*\*2>=2.094  
124A ->126A 0.89144  
125A ->126A -0.25657  
125A ->129A 0.11627  
125A ->131A -0.20704  
123B ->124B -0.12548  
123B ->125B 0.11961

Excited State 3: 3.097-A 2.4641 eV 503.17 nm f=0.0009 <S\*\*2>=2.148  
124A ->126A 0.15217  
122B ->125B 0.25735  
123B ->124B 0.90912

Excited State 4: 3.071-A 2.6870 eV 461.42 nm f=0.0389 <S\*\*2>=2.108  
124A ->127A -0.10673  
125A ->127A -0.12224  
125A ->128A -0.11794  
125A ->131A 0.12875  
120B ->124B 0.14862  
121B ->124B 0.21193  
121B ->125B 0.25187  
122B ->124B 0.60869  
123B ->125B 0.58310

Excited State 5: 3.048-A 2.7845 eV 445.27 nm f=0.0119 <S\*\*2>=2.072



|             |          |
|-------------|----------|
| 125A ->128A | 0.11081  |
| 118B ->124B | -0.13620 |
| 118B ->125B | -0.10900 |
| 119B ->124B | -0.15556 |
| 119B ->125B | -0.11617 |
| 120B ->125B | 0.16370  |
| 121B ->124B | 0.68686  |
| 121B ->125B | 0.49689  |
| 122B ->124B | -0.11493 |
| 122B ->125B | 0.10658  |
| 123B ->125B | -0.28335 |

Excited State 6: 3.044-A 2.8616 eV 433.27 nm f=0.0021 <S\*\*2>=2.066

|             |          |
|-------------|----------|
| 125A ->127A | 0.11913  |
| 125A ->128A | 0.20632  |
| 115B ->124B | 0.17257  |
| 115B ->125B | -0.10309 |
| 117B ->124B | 0.28544  |
| 117B ->125B | -0.18381 |
| 119B ->124B | 0.24735  |
| 119B ->125B | -0.20348 |
| 120B ->124B | 0.68858  |
| 120B ->125B | -0.36454 |

Excited State 7: 3.056-A 2.8988 eV 427.71 nm f=0.0478 <S\*\*2>=2.085

|             |          |
|-------------|----------|
| 124A ->126A | -0.10100 |
| 124A ->127A | -0.15290 |
| 124A ->128A | -0.29983 |
| 124A ->131A | 0.12223  |
| 125A ->128A | 0.72775  |
| 125A ->129A | 0.12827  |
| 125A ->131A | -0.21892 |
| 125A ->133A | -0.10254 |
| 117B ->124B | -0.10108 |
| 119B ->124B | -0.16571 |
| 120B ->125B | 0.15639  |
| 122B ->125B | -0.10427 |
| 123B ->125B | 0.32360  |

Excited State 8: 3.089-A 2.9407 eV 421.62 nm f=0.0840 <S\*\*2>=2.136

|             |          |
|-------------|----------|
| 124A ->126A | -0.10837 |
| 124A ->127A | 0.57359  |
| 125A ->127A | 0.71779  |

**1[3,6]-S anti**

Excited State 1: 1.367-A 1.3389 eV 925.99 nm f=0.0019 <S\*\*2>=0.217

|             |          |
|-------------|----------|
| 124A ->125A | -0.53938 |
| 124A ->126A | -0.15610 |
| 124B ->125B | 0.81616  |

This state for optimization and/or second-order correction.

Total Energy, E(TD-HF/TD-KS) = -1487.62908966

Copying the excited state density for this state as the 1-particle RhoCI density.

Excited State 2: 1.292-A 1.4662 eV 845.64 nm f=0.0042 <S\*\*2>=0.167

|             |         |
|-------------|---------|
| 124A ->125A | 0.80919 |
|-------------|---------|

|               |          |         |           |           |          |              |
|---------------|----------|---------|-----------|-----------|----------|--------------|
| 124A ->126A   | 0.13827  |         |           |           |          |              |
| 124B ->125B   | 0.56384  |         |           |           |          |              |
| Excited State | 3:       | 2.255-A | 2.2425 eV | 552.89 nm | f=0.0215 | <S**2>=1.021 |
| 124A ->125A   | 0.15071  |         |           |           |          |              |
| 124A ->126A   | -0.63899 |         |           |           |          |              |
| 124B ->126B   | 0.68115  |         |           |           |          |              |
| 124B ->128B   | -0.12608 |         |           |           |          |              |
| 124B ->131B   | 0.12405  |         |           |           |          |              |
| Excited State | 4:       | 2.234-A | 2.3211 eV | 534.17 nm | f=0.0594 | <S**2>=0.997 |
| 124A ->125A   | -0.15680 |         |           |           |          |              |
| 124A ->126A   | 0.66863  |         |           |           |          |              |
| 124A ->131A   | -0.11822 |         |           |           |          |              |
| 124B ->126B   | 0.64269  |         |           |           |          |              |
| 124B ->128B   | -0.10727 |         |           |           |          |              |
| 124B ->131B   | 0.11896  |         |           |           |          |              |
| Excited State | 5:       | 2.396-A | 2.6064 eV | 475.69 nm | f=0.0093 | <S**2>=1.185 |
| 121A ->125A   | -0.18250 |         |           |           |          |              |
| 122A ->125A   | 0.16751  |         |           |           |          |              |
| 123A ->125A   | 0.84719  |         |           |           |          |              |
| 123B ->125B   | 0.30474  |         |           |           |          |              |
| 124B ->128B   | 0.13074  |         |           |           |          |              |
| Excited State | 6:       | 2.333-A | 2.7040 eV | 458.52 nm | f=0.0351 | <S**2>=1.111 |
| 121A ->125A   | 0.21146  |         |           |           |          |              |
| 122A ->125A   | -0.17515 |         |           |           |          |              |
| 123A ->125A   | -0.22778 |         |           |           |          |              |
| 124A ->127A   | 0.19860  |         |           |           |          |              |
| 116B ->125B   | -0.11163 |         |           |           |          |              |
| 121B ->125B   | 0.14840  |         |           |           |          |              |
| 122B ->125B   | 0.21395  |         |           |           |          |              |
| 123B ->125B   | 0.81577  |         |           |           |          |              |
| 124B ->128B   | -0.11248 |         |           |           |          |              |
| Excited State | 7:       | 2.301-A | 2.7846 eV | 445.25 nm | f=0.0089 | <S**2>=1.074 |
| 119A ->125A   | 0.23484  |         |           |           |          |              |
| 121A ->125A   | 0.86849  |         |           |           |          |              |
| 122A ->125A   | -0.11673 |         |           |           |          |              |
| 123A ->125A   | 0.23201  |         |           |           |          |              |
| 123B ->125B   | -0.12382 |         |           |           |          |              |
| 124B ->128B   | 0.19710  |         |           |           |          |              |
| Excited State | 8:       | 2.318-A | 2.8779 eV | 430.82 nm | f=0.0528 | <S**2>=1.093 |
| 115A ->125A   | -0.10117 |         |           |           |          |              |
| 121A ->125A   | -0.11185 |         |           |           |          |              |
| 122A ->125A   | 0.17065  |         |           |           |          |              |
| 123A ->125A   | -0.25500 |         |           |           |          |              |
| 121B ->125B   | 0.15283  |         |           |           |          |              |
| 124B ->126B   | 0.19129  |         |           |           |          |              |
| 124B ->128B   | 0.81317  |         |           |           |          |              |
| 124B ->130B   | -0.10599 |         |           |           |          |              |
| 124B ->131B   | -0.24871 |         |           |           |          |              |

**1[3,6]-S syn**

Excited State 1: 1.265-A 1.4266 eV 869.09 nm f=0.0757 <S\*\*2>=0.150  
124A ->125A 0.98477

This state for optimization and/or second-order correction.

Total Energy, E(TD-HF/TD-KS) = -1487.62657997

Copying the excited state density for this state as the 1-particle RhoCI density.

Excited State 2: 1.325-A 1.4837 eV 835.62 nm f=0.0195 <S\*\*2>=0.189  
124A ->125A 0.12153  
124B ->125B 0.96785  
124B ->126B 0.18908

Excited State 3: 2.398-A 2.2073 eV 561.71 nm f=0.0189 <S\*\*2>=1.187  
124A ->126A 0.84259  
124A ->131A 0.16893  
124B ->126B 0.42416

Excited State 4: 2.102-A 2.2400 eV 553.51 nm f=0.0373 <S\*\*2>=0.854  
124A ->126A -0.43079  
124A ->131A -0.11276  
124B ->125B -0.19803  
124B ->126B 0.82546  
124B ->131B -0.14585

Excited State 5: 2.367-A 2.6273 eV 471.91 nm f=0.0365 <S\*\*2>=1.150  
123A ->125A 0.12870  
124A ->128A 0.12425  
117B ->125B 0.10355  
121B ->125B -0.18255  
122B ->125B -0.24844  
123B ->125B 0.88250

Excited State 6: 2.347-A 2.6895 eV 460.99 nm f=0.0292 <S\*\*2>=1.127  
121A ->125A -0.14589  
122A ->125A 0.21927  
123A ->125A 0.88815  
123B ->125B -0.12760  
124B ->126B 0.10052  
124B ->127B 0.19646

### 1[3,7]-T anti

Excited State 1: 3.033-A 2.0225 eV 613.02 nm f=0.0315 <S\*\*2>=2.050  
124A ->126A -0.22770  
124A ->131A 0.15366  
125A ->126A 0.93467

This state for optimization and/or second-order correction.

Total Energy, E(TD-HF/TD-KS) = -1487.60488970

Copying the excited state density for this state as the 1-particle RhoCI density.

Excited State 2: 3.062-A 2.2177 eV 559.07 nm f=0.0148 <S\*\*2>=2.094  
124A ->126A 0.86024  
125A ->126A 0.22355  
125A ->131A 0.20265  
123B ->124B -0.30676

|               |    |          |           |           |          |              |
|---------------|----|----------|-----------|-----------|----------|--------------|
| Excited State | 3: | 3.075-A  | 2.4058 eV | 515.36 nm | f=0.0307 | <S**2>=2.115 |
| 124A ->126A   |    | 0.29109  |           |           |          |              |
| 122B ->125B   |    | 0.21949  |           |           |          |              |
| 123B ->124B   |    | 0.87974  |           |           |          |              |
| 123B ->125B   |    | -0.15760 |           |           |          |              |
| Excited State | 4: | 3.066-A  | 2.6701 eV | 464.34 nm | f=0.0547 | <S**2>=2.101 |
| 124A ->126A   |    | 0.10952  |           |           |          |              |
| 124A ->127A   |    | 0.13695  |           |           |          |              |
| 120B ->125B   |    | -0.11310 |           |           |          |              |
| 121B ->124B   |    | 0.22191  |           |           |          |              |
| 121B ->125B   |    | -0.11308 |           |           |          |              |
| 122B ->124B   |    | 0.57727  |           |           |          |              |
| 123B ->124B   |    | 0.10031  |           |           |          |              |
| 123B ->125B   |    | 0.66312  |           |           |          |              |
| Excited State | 5: | 3.046-A  | 2.7964 eV | 443.37 nm | f=0.0079 | <S**2>=2.069 |
| 125A ->128A   |    | -0.11219 |           |           |          |              |
| 116B ->125B   |    | -0.14077 |           |           |          |              |
| 118B ->124B   |    | 0.17538  |           |           |          |              |
| 118B ->125B   |    | -0.17148 |           |           |          |              |
| 120B ->125B   |    | -0.19751 |           |           |          |              |
| 121B ->124B   |    | 0.73924  |           |           |          |              |
| 121B ->125B   |    | -0.39136 |           |           |          |              |
| 123B ->125B   |    | -0.31039 |           |           |          |              |
| Excited State | 6: | 3.076-A  | 2.8593 eV | 433.62 nm | f=0.0576 | <S**2>=2.116 |
| 124A ->126A   |    | 0.11191  |           |           |          |              |
| 124A ->128A   |    | 0.26418  |           |           |          |              |
| 125A ->127A   |    | 0.28082  |           |           |          |              |
| 125A ->128A   |    | 0.63040  |           |           |          |              |
| 115B ->124B   |    | 0.13494  |           |           |          |              |
| 116B ->124B   |    | 0.20041  |           |           |          |              |
| 118B ->124B   |    | 0.10850  |           |           |          |              |
| 120B ->124B   |    | 0.36163  |           |           |          |              |
| 120B ->125B   |    | 0.16874  |           |           |          |              |
| 121B ->125B   |    | -0.26648 |           |           |          |              |
| 122B ->124B   |    | -0.13683 |           |           |          |              |
| 122B ->125B   |    | -0.12330 |           |           |          |              |
| Excited State | 7: | 3.056-A  | 2.8684 eV | 432.25 nm | f=0.0260 | <S**2>=2.084 |
| 124A ->128A   |    | -0.21291 |           |           |          |              |
| 125A ->127A   |    | -0.29872 |           |           |          |              |
| 125A ->128A   |    | -0.44430 |           |           |          |              |
| 115B ->124B   |    | 0.18640  |           |           |          |              |
| 115B ->125B   |    | 0.10829  |           |           |          |              |
| 116B ->124B   |    | 0.30153  |           |           |          |              |
| 116B ->125B   |    | 0.12773  |           |           |          |              |
| 118B ->124B   |    | 0.13031  |           |           |          |              |
| 120B ->124B   |    | 0.48388  |           |           |          |              |
| 120B ->125B   |    | 0.23901  |           |           |          |              |
| 121B ->124B   |    | -0.11422 |           |           |          |              |
| 121B ->125B   |    | -0.30300 |           |           |          |              |
| 122B ->125B   |    | -0.12715 |           |           |          |              |
| 123B ->125B   |    | 0.13138  |           |           |          |              |

Excited State 8: 3.095-A 2.9459 eV 420.87 nm f=0.0989 <S\*\*2>=2.145  
 124A ->127A -0.59764  
 125A ->127A 0.62615  
 125A ->128A -0.32517  
 123B ->125B 0.15700

**1[3,7]-T syn**

Excited State 1: 3.035-A 2.1282 eV 582.58 nm f=0.0060 <S\*\*2>=2.053  
 124A ->126A 0.93808  
 124A ->131A 0.14322  
 125A ->126A 0.15274  
 123B ->125B -0.12979

This state for optimization and/or second-order correction.

Total Energy, E(TD-HF/TD-KS) = -1487.60136394

Copying the excited state density for this state as the 1-particle RhoCI density.

Excited State 2: 3.048-A 2.1700 eV 571.37 nm f=0.0566 <S\*\*2>=2.072  
 124A ->126A -0.14619  
 125A ->126A 0.92495  
 125A ->128A 0.16154  
 125A ->131A -0.17057  
 123B ->124B 0.12552

Excited State 3: 3.094-A 2.5129 eV 493.39 nm f=0.1034 <S\*\*2>=2.142  
 122B ->124B 0.17760  
 122B ->125B -0.25878  
 123B ->124B 0.84570  
 123B ->125B -0.30739

Excited State 4: 3.070-A 2.6562 eV 466.77 nm f=0.0088 <S\*\*2>=2.106  
 124A ->126A 0.13685  
 124A ->127A -0.17803  
 122B ->124B -0.36915  
 122B ->125B -0.30796  
 123B ->124B 0.24484  
 123B ->125B 0.76291

Excited State 5: 3.043-A 2.8121 eV 440.89 nm f=0.0033 <S\*\*2>=2.065  
 117B ->124B 0.10427  
 118B ->124B 0.18747  
 118B ->125B -0.12689  
 119B ->124B -0.13652  
 120B ->124B -0.13435  
 120B ->125B 0.10231  
 121B ->124B 0.74390  
 121B ->125B -0.48927  
 121B ->126B 0.12045  
 123B ->125B -0.13839

Excited State 6: 3.086-A 2.8467 eV 435.53 nm f=0.0827 <S\*\*2>=2.131  
 125A ->126A -0.19564  
 125A ->128A 0.92960  
 125A ->131A -0.10137  
 125A ->133A 0.11067

Excited State 7: 3.042-A 2.8860 eV 429.60 nm f=0.0051 <S\*\*2>=2.063

|             |          |
|-------------|----------|
| 115B ->124B | -0.14518 |
| 115B ->125B | -0.16958 |
| 116B ->124B | -0.14114 |
| 116B ->125B | -0.16220 |
| 117B ->124B | -0.17128 |
| 117B ->125B | -0.18167 |
| 119B ->124B | 0.12083  |
| 119B ->125B | 0.15228  |
| 120B ->124B | 0.46402  |
| 120B ->125B | 0.55909  |
| 121B ->124B | 0.17333  |
| 121B ->125B | 0.26768  |
| 122B ->124B | -0.17881 |
| 122B ->125B | -0.22939 |
| 123B ->124B | -0.11041 |
| 123B ->125B | -0.20665 |

Excited State 8: 3.101-A 2.9689 eV 417.61 nm f=0.0735 <S\*\*2>=2.155

|             |         |
|-------------|---------|
| 124A ->127A | 0.92477 |
| 125A ->127A | 0.12763 |
| 123B ->125B | 0.15761 |

**1[3,7]-S anti**

Excited State 1: 1.313-A 1.3645 eV 908.65 nm f=0.0740 <S\*\*2>=0.181

|             |          |
|-------------|----------|
| 124A ->125A | -0.49194 |
| 124A ->126A | -0.16670 |
| 124B ->125B | 0.84416  |

This state for optimization and/or second-order correction.

Total Energy, E(TD-HF/TD-KS) = -1487.62920700

Copying the excited state density for this state as the 1-particle RhoCI density.

Excited State 2: 1.339-A 1.4105 eV 879.02 nm f=0.0014 <S\*\*2>=0.198

|             |         |
|-------------|---------|
| 124A ->125A | 0.83769 |
| 124A ->126A | 0.13400 |
| 124B ->125B | 0.52156 |

Excited State 3: 2.378-A 2.2038 eV 562.60 nm f=0.0235 <S\*\*2>=1.163

|             |          |
|-------------|----------|
| 124A ->126A | 0.21189  |
| 124B ->126B | 0.91959  |
| 124B ->127B | -0.12466 |
| 124B ->131B | -0.20814 |

Excited State 4: 2.096-A 2.3064 eV 537.56 nm f=0.0213 <S\*\*2>=0.848

|             |          |
|-------------|----------|
| 124A ->125A | -0.22283 |
| 124A ->126A | 0.90176  |
| 124A ->131A | -0.15528 |
| 123B ->125B | -0.11596 |
| 124B ->126B | -0.20375 |

Excited State 5: 2.372-A 2.5630 eV 483.75 nm f=0.0673 <S\*\*2>=1.156

|             |         |
|-------------|---------|
| 122A ->125A | 0.21216 |
| 123A ->125A | 0.92653 |

Excited State 6: 2.330-A 2.6681 eV 464.68 nm f=0.0418 <S\*\*2>=1.108

|             |         |
|-------------|---------|
| 124A ->126A | 0.10448 |
|-------------|---------|

|             |         |
|-------------|---------|
| 124A ->127A | 0.19620 |
| 122B ->125B | 0.32063 |
| 123B ->125B | 0.88030 |

Excited State 7: 2.299-A 2.8091 eV 441.36 nm f=0.0035 <S\*\*2>=1.072

|             |          |
|-------------|----------|
| 118A ->125A | -0.10083 |
| 119A ->125A | 0.21156  |
| 120A ->125A | 0.14840  |
| 121A ->125A | 0.87055  |
| 121A ->126A | -0.12685 |
| 122A ->125A | -0.26653 |
| 123A ->125A | 0.15955  |

Excited State 8: 2.311-A 2.8970 eV 427.97 nm f=0.0228 <S\*\*2>=1.085

|             |          |
|-------------|----------|
| 124A ->127A | -0.13088 |
| 117B ->125B | -0.21594 |
| 118B ->125B | -0.26761 |
| 120B ->125B | -0.30648 |
| 121B ->125B | 0.55280  |
| 122B ->125B | 0.26670  |
| 124B ->127B | -0.51955 |
| 124B ->128B | -0.19491 |

**1[3,7]-S syn**

Excited State 1: 1.415-A 1.2735 eV 973.54 nm f=0.0043 <S\*\*2>=0.251

|             |          |
|-------------|----------|
| 124A ->125A | -0.68449 |
| 124A ->126A | 0.17625  |
| 124B ->125B | 0.69403  |

This state for optimization and/or second-order correction.

Total Energy, E(TD-HF/TD-KS) = -1487.63170215

Copying the excited state density for this state as the 1-particle RhoCI density.

Excited State 2: 1.288-A 1.4153 eV 876.00 nm f=0.0043 <S\*\*2>=0.165

|             |          |
|-------------|----------|
| 124A ->125A | 0.69157  |
| 124A ->126A | -0.10580 |
| 124B ->125B | 0.70952  |

Excited State 3: 2.290-A 2.2588 eV 548.89 nm f=0.0340 <S\*\*2>=1.061

|             |          |
|-------------|----------|
| 124A ->126A | -0.29568 |
| 124B ->126B | 0.87773  |
| 124B ->127B | 0.19078  |
| 124B ->131B | -0.17947 |

Excited State 4: 2.183-A 2.3486 eV 527.90 nm f=0.0085 <S\*\*2>=0.942

|             |         |
|-------------|---------|
| 123A ->125A | 0.18389 |
| 124A ->125A | 0.19560 |
| 124A ->126A | 0.86954 |
| 124A ->131A | 0.14071 |
| 123B ->125B | 0.11578 |
| 124B ->126B | 0.27660 |

Excited State 5: 2.369-A 2.5551 eV 485.25 nm f=0.0446 <S\*\*2>=1.153

|             |         |
|-------------|---------|
| 121A ->125A | 0.12974 |
| 122A ->125A | 0.16640 |
| 123A ->125A | 0.88382 |

|             |          |
|-------------|----------|
| 124A ->126A | -0.16263 |
| 122B ->125B | -0.11241 |
| 123B ->125B | 0.20137  |
| 124B ->126B | -0.12256 |
| 124B ->127B | -0.11087 |

Excited State 6: 2.322-A 2.7048 eV 458.39 nm f=0.0376 <S\*\*2>=1.098

|             |          |
|-------------|----------|
| 121A ->125A | -0.15007 |
| 122A ->125A | -0.11519 |
| 123A ->125A | -0.19890 |
| 124A ->127A | 0.20398  |
| 122B ->125B | -0.35889 |
| 123B ->125B | 0.81638  |

**2**

Excited State 1: 2.086-A 2.5287 eV 490.31 nm f=0.0071  
<S\*\*2>=0.838

|            |          |
|------------|----------|
| 71A -> 72A | 0.85938  |
| 71A -> 73A | -0.41366 |
| 71A -> 74A | -0.18658 |
| 66B -> 71B | 0.11191  |

This state for optimization and/or second-order correction.

Total Energy, E(TD-HF/TD-KS) = -822.995565353

Copying the excited state density for this state as the 1-particle RhoCI density.

Excited State 2: 2.109-A 2.6753 eV 463.43 nm f=0.0329  
<S\*\*2>=0.862

|            |         |
|------------|---------|
| 71A -> 72A | 0.17259 |
| 71A -> 73A | 0.11911 |
| 67B -> 71B | 0.10414 |
| 69B -> 71B | 0.27640 |
| 70B -> 71B | 0.90284 |

Excited State 3: 2.053-A 2.8415 eV 436.33 nm f=0.0035  
<S\*\*2>=0.804

|            |          |
|------------|----------|
| 71A -> 72A | -0.11826 |
| 71A -> 73A | -0.17571 |
| 68B -> 71B | 0.22215  |
| 69B -> 71B | 0.89879  |
| 70B -> 71B | -0.24242 |

Excited State 4: 2.104-A 2.9452 eV 420.97 nm f=0.0798  
<S\*\*2>=0.857

|            |          |
|------------|----------|
| 71A -> 72A | 0.39498  |
| 71A -> 73A | 0.82427  |
| 71A -> 74A | 0.12203  |
| 66B -> 71B | -0.12370 |
| 67B -> 71B | -0.10109 |
| 69B -> 71B | 0.16308  |
| 70B -> 71B | -0.22681 |

Excited State 5: 2.116-A 3.2928 eV 376.53 nm f=0.0054  
<S\*\*2>=0.869

|            |          |
|------------|----------|
| 71A -> 72A | 0.10237  |
| 71A -> 73A | -0.20477 |
| 71A -> 74A | 0.92738  |



71A -> 75A           0.13606  
68B -> 71B           -0.13319

## 8. Archive for DFT calculations

### 1[3,6]-T, anti

```
1\1\GINC-GAUSIANDELL\FOpt\UB3LYP\6-311G(d,p)\C30H26N6(3)\PKASZYNSKI\08
-Jan-2024\0\#P UB3LYP/6-311G(d,p) FOpt SCF=Direct Geom=(NoDistance,No
Angle) fcheck freq #P SCRF=(solvent=Benzene)\3-(3-tBu-1-Ph-benzo[e][1
,2,4]triazinyl-6-)-1-Ph-benzo[e][1,2,4]triazinyl, conformer anti\0,
3\C,-0.4103196743,-1.9697230408,-0.12010716\C,0.4218029976,-0.83636597
39,-0.0425634681\C,-1.7886633402,-1.8501585771,-0.1056318614\C,-0.1634
879555,0.4253558755,0.023356204\C,-2.3786149298,-0.5803103579,-0.00707
98137\C,-1.5575843843,0.5829766039,0.0253660979\N,-2.1027302656,1.8396
724461,0.0363295048\N,-3.7471436134,-0.3586973222,0.0338368485\N,-4.28
7788132,0.8958432681,-0.0518737198\C,-3.4329970475,1.9138941871,-0.045
6469123\C,-4.7172106179,-1.4087325158,0.1199132424\C,-5.7625143084,-1.
4493783922,-0.8040729415\C,-4.6435468403,-2.3534458585,1.1452628297\C,
-6.7244446167,-2.4499181859,-0.7090835029\C,-5.6088489783,-3.353307491
,1.2288199003\C,-6.6486588784,-3.4067814923,0.302417537\C,1.8968599232
,-1.0101197317,-0.050150913\C,3.7365526458,-2.3795718237,-0.1707985739
\C,4.5925911567,-1.2428275764,-0.1619302446\N,2.3765754994,-2.25602378
71,-0.0850108309\N,2.6077159909,0.119664691,-0.0081569021\N,3.96123141
11,-0.0082040893,0.0024562082\C,4.6675030957,1.2312439726,0.1319144698
\C,4.3330936698,2.2960978997,-0.7061083399\C,5.6444309553,1.3863171551
,1.1172342411\C,4.9922583222,3.5131077803,-0.5655775105\C,6.3014090211
,2.6070844525,1.2460418819\C,5.9804777045,3.6713398812,0.4053671949\C,
4.3173008879,-3.6550565045,-0.2998724376\C,5.9732491168,-1.3961577078,
-0.3428057655\C,5.686251688,-3.8007641213,-0.4459595211\C,6.5113852039
,-2.6695177309,-0.4792837994\H,-2.4062884052,-2.7342701948,-0.17728744
9\H,0.4461209862,1.3170877954,0.0660183872\H,-5.8139890413,-0.69555195
75,-1.5784448323\H,-3.848779268,-2.2959429377,1.8784496558\H,-7.533715
9552,-2.4825460558,-1.4292971008\H,-5.5531353297,-4.0828778031,2.02832
61184\H,-7.3996833537,-4.1849270184,0.3723887198\H,0.0502296486,-2.945
10269,-0.1952322372\H,3.5580289478,2.1624123626,-1.4492368414\H,5.8734
48764,0.5668495279,1.7869630393\H,4.7335132873,4.338626411,-1.21834760
34\H,7.0550364377,2.7283558593,2.0154232795\H,6.4916163015,4.620988221
8,0.5115869873\H,6.1186759207,-4.7892131567,-0.5471067367\H,6.61746239
33,-0.5291468393,-0.3816345082\H,3.6508026506,-4.5088095985,-0.2944057
075\H,7.5803655845,-2.7808637846,-0.6167805749\C,-3.6200574349,4.09408
50693,1.1489180207\H,-2.5337248716,4.1237936038,1.2430853823\H,-3.9966
812883,5.1202015011,1.1030524988\H,-4.0302904183,3.6230330224,2.047129
4136\C,-5.5736104876,3.2873524613,-0.2148112372\H,-5.9098760382,2.7581
165569,-1.1088284763\H,-6.0183956004,2.7917279876,0.6500577438\H,-5.95
49048042,4.3116856875,-0.2601540075\C,-4.039974462,3.3210265473,-0.120
8298643\C,-3.4645956874,4.0310274368,-1.3659590411\H,-3.8471574853,5.0
54338558,-1.4227476686\H,-2.375194693,4.0664546424,-1.3232317728\H,-3.
7555190051,3.5103458509,-2.2833565299\Version=ES64L-G09RevD.01\State=
3-A\HF=-1487.6576401\S2=2.028123\S2-1=0.\S2A=2.000459\RMSD=6.919e-09\R
MSF=3.826e-06\Dipole=0.9839986,-0.6243977,-0.002848\Quadrupole=18.3049
5,-3.148112,-15.156838,14.1460676,3.7460642,-2.7721024\PG=C01 [X(C30H2
6N6)]\@
```

### 1[3,6]-T, syn

```
1\1\GINC-GAUSIANDELL\FOpt\UB3LYP\6-311G(d,p)\C30H26N6(3)\PKASZYNSKI\08
```

-Jan-2024\0\#\P UB3LYP/6-311G(d,p) FOpt SCF=Direct Geom=(NoDistance,NoAngle) fcheck freq #P SCRF=(solvent=Benzene)\3-(3-tBu-1-Ph-benzo[e][1,2,4]triazinyl-6-)-1-Ph-benzo[e][1,2,4]triazinyl, conformer syn\0,3\C,0.0415947196,1.0927765309,0.0841285695\C,0.4620700337,-0.2485140278,-0.01576246\C,-1.3015739988,1.4231323445,0.0895848475\C,-0.4998060583,-1.2509444978,-0.0851359856\C,-2.2717896998,0.413040258,-0.0132277619\C,-1.870944599,-0.9509090991,-0.0708545258\N,-2.7915177526,-1.9657864304,-0.0879043279\N,-3.6399861421,0.6461998165,-0.0336783156\N,-4.5540296062,-0.3695428585,0.051314116\C,-4.0731552378,-1.6086021298,0.0180784749\C,-4.2232109748,1.9521753203,-0.0904510418\C,-5.2073336045,2.2989591927,0.8369838803\C,-3.8482249943,2.8511923483,-1.0911034513\C,-5.8016821768,3.554903285,0.7710280825\C,-4.4458938799,4.1075374282,-1.1451853052\C,-5.4203512721,4.46434975,-0.2149297801\C,1.9064661738,-0.5990102076,-0.0348125801\C,3.5656798329,-2.1839201896,-0.1226422411\C,4.5541241233,-1.1691855898,0.0157581169\N,2.231548027,-1.8860043765,-0.1734815111\N,2.7489809539,0.4316787814,0.0776753059\N,4.0787458379,0.1420251363,0.0407138477\C,4.9321749797,1.2912070691,0.0920544437\C,4.7458559763,2.2339373432,1.1041998037\C,5.9092174888,1.4867510327,-0.8855200257\C,5.5522796295,3.3669182235,1.143779754\C,6.714114562,2.6217824911,-0.8342260693\C,6.5406559413,3.5621297988,0.1797055901\C,3.9857448162,-3.5258762046,-0.1831159561\C,5.9064435337,-1.5122182668,0.1462191313\C,5.3265045709,-3.8550594998,-0.0834459136\C,6.2840574311,-2.8476902994,0.092212241\H,-1.599829305,2.4582012564,0.1779377631\H,-0.2028812234,-2.288712536,-0.1411335821\H,-5.4997830957,1.5802817841,1.5908352632\H,-3.1100934088,2.5630580801,-1.8289545616\H,-6.5630689178,3.8238080813,1.4939999854\H,-4.1575189352,4.8019422726,-1.9257354887\H,-5.8855116654,5.4419944784,-0.2626726093\H,0.786473884,1.8732407572,0.1572828506\H,3.971415306,2.0726411334,1.8426953638\H,6.0254969947,0.7669781218,-1.6862047565\H,5.4096255923,4.0967493115,1.9322598842\H,7.4685747053,2.7756950639,-1.5969082917\H,7.1672403741,4.4456481808,0.2145147479\H,5.6351160853,-4.8927361422,-0.1295957678\H,6.6520176956,-0.7435706269,0.2936390118\H,3.2196133672,-4.2827026296,-0.2977591309\H,7.3315559081,-3.1061960233,0.1922121261\C,-5.0024620109,-3.5516846289,-1.2321842668\H,-3.990356258,-3.9317844073,-1.3783538407\H,-5.6943425819,-4.3986592237,-1.2046674198\H,-5.2639550746,-2.9290068602,-2.0929297089\C,-6.5354558544,-2.2212100675,0.2542355593\H,-6.6460276028,-1.6533497079,1.1806085622\H,-6.8264529358,-1.5683959185,-0.5705135703\H,-7.2284363278,-3.0670041598,0.2869903658\C,-5.1013902803,-2.7457099993,0.0823607329\C,-4.7421430669,-3.6613479065,1.2726171746\H,-5.4324566737,-4.509056449,1.3145790686\H,-3.7249250316,-4.0422963148,1.1749168842\H,-4.8156612969,-3.1190003926,2.2201506985\Version=ES64L-G09RevD.01\State=3-A\HF=-1487.6570143\S2=2.028181\S2-1=0.\S2A=2.000461\RMSD=5.998e-09\RMSF=4.441e-06\Dipole=1.5625061,1.8226954,0.0983654\Quadrupole=14.2618782,-0.3285983,-13.9332799,-5.803,-3.7941502,0.201144\PG=C01 [X(C30H26N6)]\@

### 1[3,6]-T,TS

1\1\GINC-LOCALHOST\FTS\UB3LYP\6-311G(d,p)\C30H26N6(3)\PIOTR\25-Jun-2024\0\#\P UB3LYP/6-311G(d,p) Opt=QST3 SCF=Direct Geom=(NoDistance,NoAngle) fcheck #P freq SCRF=(solvent=Benzene)\3-(3-tBu-1-Ph-benzo[e][1,2,4]triazinyl-6-)-1-Ph-benzo[e][1,2,4]triazinyl, conformer anti\0,3\C,-0.4149849912,-1.9945834084,-0.0780848108\C,0.4150421444,-0.863460937,-0.0276172677\C,-1.7958683372,-1.8662010989,-0.0641525424\C,-0.1546146471,0.398906446,0.0096600844\C,-2.375793686,-0.5921677006,0.0101042573\C,-1.5518333412,0.5671961642,0.0143700342\N,-2.0846873681,1.8264459022,-0.0029469261\N,-3.74827309,-0.3597906464,0.0508115222\N,-4.2759348188,0.8960369831,-0.0759015353\C,-3.415792725,1.9075723435,-0.0937723557\C,-4.7258589934,-1.3965924187,0.1751028496\C,-5.7958477208,-1.4362955

177,-0.7210537622\C,-4.638809353,-2.3299502467,1.2105917244\C,-6.76785  
74499,-2.4224176228,-0.5881353897\C,-5.6144557261,-3.315789532,1.33157  
3042\C,-6.6787478464,-3.3675801613,0.4332501717\C,1.9044758645,-1.0215  
432437,-0.0439066765\C,3.8774699322,-1.0982333871,-1.1990988063\C,4.59  
5298691,-1.1762307929,0.0271119485\N,2.504956948,-1.0533596971,-1.2311  
507808\N,2.4617637613,-1.1289635477,1.1591729633\N,3.8205355898,-1.281  
9917162,1.1838744608\C,4.3613973764,-1.4924742433,2.4911624995\C,3.940  
8190946,-0.6727619109,3.5406705972\C,5.2576244034,-2.5375990708,2.7279  
662812\C,4.435603269,-0.889646687,4.8223058097\C,5.7499477445,-2.74243  
68087,4.0139662652\C,5.3448365174,-1.9191435753,5.0629951797\C,4.60361  
77309,-1.0312422486,-2.4015518255\C,5.995836144,-1.1143959739,0.027490  
5348\C,5.9876249548,-1.0071512481,-2.3944376236\C,6.6809406823,-1.0348  
936594,-1.1776416602\H,-2.4188790702,-2.7479322945,-0.1154889711\H,0.4  
554257196,1.293698746,0.0209741484\H,-5.8577527292,-0.6921515957,-1.50  
38016106\H,-3.8262623902,-2.2730936409,1.9239569648\H,-7.5956188793,-2  
.4533967343,-1.2871298094\H,-5.5474762973,-4.0353655101,2.1392872336\H  
, -7.4377183175,-4.1346866803,0.5328741566\H,0.0271971281,-2.9820061283  
, -0.1336681539\H,3.2252234991,0.1139562871,3.3426670642\H,5.5504823944  
, -3.1948664984,1.9190442121\H,4.110551177,-0.2499251419,5.6345239206\H  
, 6.440808272,-3.5573388983,4.1963112699\H,5.728434388,-2.0840113145,6.  
0629994805\H,6.534488014,-0.9520625064,-3.3282357248\H,6.5414432698,-1  
.122166647,0.9603892801\H,4.0355930626,-0.9826323698,-3.3223748043\H,7  
.7634967656,-0.9890819213,-1.1688668195\C,-3.6019193642,4.1153080592,1  
.0480174489\H,-2.5165302105,4.141798906,1.1537596042\H,-3.9723044051,5  
.1420773216,0.9750035791\H,-4.0247266733,3.6665498789,1.9518110768\C,-  
5.5444778896,3.2891325106,-0.3195314095\H,-5.8727801593,2.7404356824,-  
1.204701769\H,-6.0019259477,2.816367194,0.5514958758\H,-5.9197735044,4  
.3140207512,-0.3933467792\C,-4.0120334431,3.3163631427,-0.2089864588\C  
, -3.4180587031,3.9944465132,-1.4631172847\H,-3.792935646,5.0187282519,  
-1.5469800006\H,-2.328960585,4.0238253228,-1.4096652398\H,-3.702330289  
7,3.4552334661,-2.371775213\\Version=ES64L-G16RevC.01\State=3-A\HF=-14  
87.6471338\S2=2.027604\S2-1=0.\S2A=2.000457\RMSD=4.895e-09\RMSF=3.268e  
-06\Dipole=0.9780137,-1.4064093,0.8188553\Quadrupole=17.4717633,-10.93  
2948,-6.5388153,3.772887,7.1460384,-2.4139495\PG=C01 [X(C30H26N6)]\

### 1[3,6]-S, anti

1\1\GINC-GAUSIANDELL\FOpt\UB3LYP\6-311G(d,p)\C30H26N6\PKASZYNSKI\08-Ja  
n-2024\0\#\#P UB3LYP/6-311G(d,p) FOpt SCF=Direct Geom=(NoDistance,NoAng  
le) fcheck guess(mix,always) #P freq SCRF=(solvent=Benzene)\3-(3-tBu-  
1-Ph-benzo[e][1,2,4]triazinyl-6)-1-Ph-benzo[e][1,2,4]triazinyl, conf  
ormer anti\0,1\C,-0.4109178082,-1.9734449046,-0.1283669063\C,0.421090  
4181,-0.8411300334,-0.0447531358\C,-1.7901136632,-1.8522507813,-0.1135  
035524\C,-0.1627266101,0.4198421231,0.0271248322\C,-2.3790780374,-0.58  
37544955,-0.0083720848\C,-1.558310456,0.5784624138,0.0289264326\N,-2.0  
991867272,1.8357274521,0.0421149615\N,-3.7502787769,-0.359626721,0.034  
0476103\N,-4.2856527856,0.8964548123,-0.0556323898\C,-3.4303426588,1.9  
126563742,-0.0461443982\C,-4.72217813,-1.4064338641,0.1219019381\C,-5.  
7785627705,-1.4360484933,-0.7902890744\C,-4.6406264766,-2.3608966914,1  
.1380213356\C,-6.742772597,-2.4341035546,-0.6929854679\C,-5.6082715417  
, -3.3582013121,1.2237183508\C,-6.6588878048,-3.4003111689,0.3089436427  
\C,1.8989167562,-1.0123722154,-0.0518448325\C,3.7388094853,-2.37994495  
59,-0.1723915202\C,4.5940602951,-1.24238119,-0.1631440461\N,2.37871836  
08,-2.2569594988,-0.0864473326\N,2.6077024158,0.1179507519,-0.00956988  
62\N,3.9621931052,-0.0089862264,0.0021886734\C,4.667062455,1.230839013  
4,0.1339840021\C,4.329969426,2.2976173964,-0.7006047096\C,5.6452906766  
,1.3845049787,1.1182938938\C,4.9879819866,3.5149641599,-0.5578803805\C  
,6.3009446546,2.6057282203,1.2493665561\C,5.9775061913,3.6718166386,0.

4119827285\C, 4.3202285829, -3.6550204813, -0.3019010161\C, 5.9750684641, -1.3949689913, -0.3445980663\C, 5.689161262, -3.79977499, -0.4483380559\C, 6.5136246952, -2.6678099038, -0.4815999115\H, -2.4080316019, -2.7358268054, -0.189599006\H, 0.4471056698, 1.3112349704, 0.0740179002\H, -5.8364143176, -0.6754516817, -1.5575015691\H, -3.8379538273, -2.3125666642, 1.8631477672\H, -7.5602407417, -2.4575928947, -1.4042783952\H, -5.5458795513, -4.0948402785, 2.0162492594\H, -7.4116357572, -4.176631444, 0.380594881\H, 0.0485699937, -2.9489184239, -0.208071812\H, 3.5538975452, 2.1649784442, -1.442842198\H, 5.8762331849, 0.5636668146, 1.7856640304\H, 4.7272708252, 4.341901702, -1.2080650359\H, 7.0555271627, 2.7258632563, 2.0179854558\H, 6.4876606699, 4.6217913941, 0.5199546706\H, 6.1222859658, -4.7878587014, -0.5499196384\H, 6.6187662384, -0.5275924031, -0.3835190925\H, 3.6542413904, -4.5091637461, -0.2965826721\H, 7.5826042474, -2.7785624734, -0.6195985641\C, -3.6173614364, 4.0935036324, 1.1469067909\H, -2.5313946429, 4.1204968542, 1.2461340852\H, -3.9910279706, 5.1205947071, 1.0989056207\H, -4.032989305, 3.6238572931, 2.0433600509\C, -5.5666761912, 3.2908950347, -0.2253523298\H, -5.9001496036, 2.7625959326, -1.1209912585\H, -6.0164340303, 2.7961875195, 0.6374690841\H, -5.9454615985, 4.3160775645, -0.272292412\C, -4.0334544983, 3.3210811639, -0.1245339383\C, -3.4508330613, 4.0294123772, -1.367273314\H, -3.8304004389, 5.0537275959, -1.425831652\H, -2.3615182897, 4.0620553414, -1.3199055304\H, -3.7391684164, 3.5093490571, -2.2858293686\Version=ES64L-G09RevD.01\State=1-A\HF=-1487.6570161\S2=1.029466\S2-1=0.\S2A=0.237516\RMSD=6.654e-09\RMSF=2.327e-06\Dipole=1.0376292, -0.5868247, -0.0045588\Quadrupole=18.3141868, -3.0964146, -15.2177723, 13.7348022, 3.7524887, -2.7643323\PG=C01 [X(C30H26N6)]\@

### 1[3,6]-S, *syn*

1\1\GINC-GAUSIANDELL\FOpt\UB3LYP\6-311G(d,p)\C30H26N6\PKASZYNSKI\09-Jan-2024\0\#\#P UB3LYP/6-311G(d,p) FOpt SCF=Direct Geom=(NoDistance,NoAngle) fcheck guess(mix,always) #P freq SCRF=(solvent=Benzene)\3-(3-tBu-1-Ph-benzo[e][1,2,4]triazinyl-6-)-1-Ph-benzo[e][1,2,4]triazinyl, conformer *syn*\0,1\C, 0.0457019926, 1.0894180245, 0.0854257491\C, 0.4637323327, -0.2518954922, -0.016249558\C, -1.2984676054, 1.4207799065, 0.0914332218\C, -0.4974900909, -1.2538880149, -0.0884428766\C, -2.2689764687, 0.4128782144, -0.0132682356\C, -1.8698358974, -0.9527283747, -0.0733378127\N, -2.7883360829, -1.9655451949, -0.091404903\N, -3.6383149803, 0.645733756, -0.0346817468\N, -4.5513109916, -0.3707317932, 0.0495017991\C, -4.0722535827, -1.6083933895, 0.0153711204\C, -4.2219712307, 1.951328561, -0.0895714153\C, -5.2093735439, 2.2952297036, 0.8355403712\C, -3.8440210164, 2.853593633, -1.0862896245\C, -5.8043525282, 3.5509635228, 0.7709569257\C, -4.4422937158, 4.1096617617, -1.1389419442\C, -5.4202585289, 4.4633746372, -0.2111357879\C, 1.9064859358, -0.6066827373, -0.0348203693\C, 3.5688558042, -2.1871434975, -0.1192776377\C, 4.5545223492, -1.1698765969, 0.0162460318\N, 2.2332277713, -1.893335534, -0.1698066204\N, 2.746133975, 0.4259372349, 0.074723589\N, 4.073542917, 0.1417838236, 0.0402731535\C, 4.9242463858, 1.2936867782, 0.0907589725\C, 4.7387735261, 2.2336419904, 1.1054351148\C, 5.8971036052, 1.4933105936, -0.8899939625\C, 5.5418855036, 3.3690555451, 1.1439842706\C, 6.6985635122, 2.6308143571, -0.8397961304\C, 6.5258927905, 3.5688634637, 0.1764277931\C, 3.9947421334, -3.5270715025, -0.1772107995\C, 5.9079150906, -1.5060110142, 0.1460885279\C, 5.337421283, -3.8505513597, -0.0780290625\C, 6.2917679751, -2.8402368406, 0.09452134\H, -1.5955751752, 2.4560844499, 0.180933904\H, -0.2005051825, -2.2914807151, -0.1467819348\H, -5.5038778448, 1.5745233867, 1.5866461446\H, -3.1030404556, 2.5681686611, -1.8223124724\H, -6.5683338019, 3.8173794251, 1.4921177062\H, -4.151589928, 4.8064029616, -1.9165481792\H, -5.8858068364, 5.4408861159, -0.2577726904\H, 0.7912500445, 1.8689920078, 0.1591462578\H, 3.967840556, 2.0685228738, 1.8468027461\H, 6.0127921347, 0.7748430404, -1.6919234175\H, 5.4000915915, 4.0970314657, 1.9343115728

\H, 7.4498215563, 2.7883330528, -1.6048791597\H, 7.1499261619, 4.4542125929, 0.2104278061\H, 5.6494654904, -4.8873469089, -0.1224758303\H, 6.6500727387, -0.7335385907, 0.2910467714\H, 3.2320572851, -4.2877077465, -0.2896482065\H, 7.3403390712, -3.0944064176, 0.1937655652\C, -4.9985047289, -3.5531632477, -1.2343136393\H, -3.9858616535, -3.9319859867, -1.3801316696\H, -5.6890633509, -4.4011736057, -1.2062292403\H, -5.260844647, -2.9315201024, -2.0955398751\C, -6.5334390815, -2.2229386483, 0.2505220059\H, -6.6449077134, -1.6547599685, 1.1765948079\H, -6.8244175729, -1.5706943995, -0.5747111092\H, -7.2258557039, -3.0691673304, 0.2832311823\C, -5.0989437393, -2.7464189615, 0.0796741267\C, -4.7392454703, -3.6609173595, 1.2707395165\H, -5.4287001162, -4.5092923393, 1.3128502145\H, -3.7216442085, -4.0410975606, 1.1737997383\H, -4.8137890388, -3.1180583098, 2.2178888643\\Version=ES64L-G09RevD.01\State=1-A\HF=-1487.6574391\S2=0.997985\S2-1=0.\S2A=0.222815\RMSD=8.561e-09\RMSF=3.835e-06\Dipole=1.5281455, 1.8507439, 0.1010633\Quadrupole=14.3590741, -0.4459325, -13.9131416, -5.0816663, -3.807983, 0.1863334\PG=C01 [X(C30H26N6)]\@

### 1[3,6]-S,TS

1\1\GINC-LOCALHOST\FTS\UB3LYP\6-311G(d,p)\C30H26N6\PIOTR\27-Jun-2024\0  
\\#P UB3LYP/6-311G(d,p) Opt=QST3 SCF=Direct Geom=(NoDistance,NoAngle)  
fcheck #P freq SCRF=(solvent=Benzene) guess(mix,always)\3-(3-tBu-1-Ph  
-benzo[e][1,2,4]triazinyl-6-)-1-Ph-benzo[e][1,2,4]triazinyl, conformer  
anti\0,1\C, -0.4011951134, -1.9729778226, -0.0769638875\C, 0.4216118366,  
-0.8367942879, -0.0292693044\C, -1.7832606175, -1.8527337303, -0.06210100  
41\C, -0.1549369939, 0.4222473207, 0.0058922487\C, -2.3706296744, -0.582511  
2324, 0.0101957778\C, -1.5536155339, 0.5822849747, 0.0111711402\N, -2.09329  
19073, 1.8375252492, -0.009424654\N, -3.744724592, -0.3574976636, 0.0523626  
229\N, -4.2792599816, 0.8948706418, -0.0783282136\C, -3.4255536649, 1.91101  
88561, -0.1002039027\C, -4.7162815815, -1.3993050786, 0.1809943273\C, -5.78  
80495747, -1.446882873, -0.7126630015\C, -4.621734928, -2.3301426132, 1.218  
143098\C, -6.7541171092, -2.4382974833, -0.5757121071\C, -5.5914405611, -3.  
3212936295, 1.3431569869\C, -6.6573747266, -3.3809811165, 0.4472436884\C, 1.  
9114655522, -0.9875199766, -0.0437351749\C, 3.8870639203, -1.0636491884, -  
1.1946861994\C, 4.6008514456, -1.1684607209, 0.0318121995\N, 2.5150702441,  
-1.0019445562, -1.229435144\N, 2.465001942, -1.1112491344, 1.1598239869\N,  
3.822334594, -1.2757680231, 1.185864411\C, 4.3582595044, -1.5028232011, 2.4  
926231872\C, 3.9490884133, -0.6828346419, 3.5463143337\C, 5.2378858927, -2.  
5629737534, 2.7241660439\C, 4.438863476, -0.9147684152, 4.8272386498\C, 5.7  
255135832, -2.7829147559, 4.0095179191\C, 5.3318331983, -1.9595878629, 5.06  
28317055\C, 4.6166657291, -0.9889063266, -2.3944811113\C, 6.0021939643, -1.  
1277037477, 0.035693391\C, 6.0008977784, -0.9839490298, -2.3843798123\C, 6.  
6909707421, -1.0400576612, -1.1667953288\H, -2.4009085424, -2.7383701775, -  
0.110773542\H, 0.4498481701, 1.3205922882, 0.0148050904\H, -5.8559462029, -  
0.7046324292, -1.4967063633\H, -3.8079373707, -2.2673568192, 1.9295745048\H,  
-7.5832175203, -2.4753293754, -1.2728269045\H, -5.5185839615, -4.0388774  
166, 2.1521371464\H, -7.4116766011, -4.1522730179, 0.5499638459\H, 0.047005  
8503, -2.9577831221, -0.1303175446\H, 3.2459392609, 0.1159886595, 3.3520899  
615\H, 5.5214963321, -3.219854571, 1.9116274839\H, 4.1227331779, -0.2749216  
407, 5.6428660181\H, 6.4035538231, -3.6093810898, 4.1878848529\H, 5.7116139  
322, -2.1361812966, 6.062294162\H, 6.5505059416, -0.9222862869, -3.31614723  
38\H, 6.545725966, -1.1569875748, 0.9693438145\H, 4.0513155838, -0.91940287  
31, -3.3156068883\H, 7.7740522652, -1.0098554604, -1.1551075931\C, -3.61635  
97961, 4.125605626, 1.027885295\H, -2.5305889996, 4.1579361434, 1.127736974  
7\H, -3.9920458879, 5.1500549321, 0.9496597662\H, -4.03231243, 3.681152033,  
1.9369716778\C, -5.5619147999, 3.2805597972, -0.3238051582\H, -5.892093731  
9, 2.7248876487, -1.2038715795\H, -6.0124090963, 2.8107981301, 0.5524880352

\H,-5.9427500503,4.3030901666,-0.4017678077\C,-4.0291262844,3.31605747  
18,-0.221387001\C,-3.4448993307,3.9883987417,-1.4832355131\H,-3.824956  
5926,5.0103497487,-1.5720361825\H,-2.355672294,4.023362031,-1.43571375  
36\H,-3.7313861277,3.4417261067,-2.3867189064\\Version=ES64L-G16RevC.0  
1\State=1-A\HF=-1487.6472665\S2=1.021853\S2-1=0.\S2A=0.223122\RMSD=6.2  
23e-09\RMSF=2.249e-06\Dipole=0.9867092,-1.4234749,0.828478\Quadrupole=  
17.2650282,-10.7481157,-6.5169124,3.5136037,7.176995,-2.4986117\PG=C01  
[X(C30H26N6)]\@

### 1[3,7]-T, anti

1\1\GINC-LOCALHOST\FOpt\UB3LYP\6-311G(d,p)\C30H26N6(3)\PIOTR\09-Jan-20  
24\0\#P UB3LYP/6-311G(d,p) FOpt SCF=Direct Geom=(NoDistance,NoAngle)  
fcheck freq #P SCRF=(solvent=Benzene)\3-(3-tBu-1-Ph-benzo[e][1,2,4]tr  
iazinyl-7-)-1-Ph-benzo[e][1,2,4]triazinyl, conformer anti\0,3\C,-1.6  
642498446,0.0271974155,-0.0365420362\C,-2.9942504791,1.8949361167,-0.1  
798931122\C,-4.1586116241,1.0841556884,-0.0645830469\C,-0.3143169908,-  
0.5848813275,0.0342933533\C,-0.150963176,-1.9816955459,0.1460916837\C,  
0.8134677515,0.2366755514,-0.0138148569\C,1.1090761405,-2.5379252716,0  
.1859615529\C,2.0921012081,-0.3186365522,0.06176026\C,2.2658602348,-1.  
7314371612,0.1276572642\N,3.4978664784,-2.3074903062,0.1071790143\N,3.  
2698442905,0.4316127452,0.048919592\N,4.4979872966,-0.1546185225,-0.08  
03707052\C,4.5407415751,-1.4777223272,-0.0445448403\C,3.3066169489,1.8  
595018496,0.1145829193\C,4.0927900965,2.5633144648,-0.8005227503\C,2.6  
073518017,2.5423729399,1.1126946433\C,4.1642508215,3.9501351358,-0.723  
1225607\C,2.6820425053,3.9308392816,1.1778663631\C,3.4567081146,4.6392  
179176,0.2612073643\N,-3.9389031621,-0.2930412931,-0.0274028961\N,-2.6  
888045463,-0.8261529172,0.0521688356\N,-1.7391690677,1.3519484005,-0.1  
911913234\C,-5.4245078459,1.6766896688,0.0349694982\C,-3.1535207229,3.  
2915534524,-0.2554184294\C,-4.4102980558,3.8674321134,-0.188354662\C,-  
5.5435202444,3.0587982145,-0.030946004\C,-4.9930575432,-1.2625443661,-  
0.0046308926\C,-5.001438208,-2.2360853431,0.9955744669\C,-5.9730675787  
, -1.261683373,-0.9990090673\C,-6.0037085019,-3.2008825458,1.0059922929  
\C,-6.9747113287,-2.2285997785,-0.9763244832\C,-6.9947508937,-3.197903  
1944,0.0249910515\H,-1.0297051632,-2.6108869989,0.1834359281\H,0.67042  
31583,1.3019936247,-0.1108695352\H,1.2529622422,-3.6097793798,0.245303  
8751\H,4.6433823236,2.0168938959,-1.5543539477\H,2.0245516235,1.992259  
798,1.8402686175\H,4.7723263742,4.4935057886,-1.4371396634\H,2.1416303  
596,4.4566172996,1.9564107518\H,3.5137464381,5.7199956184,0.3172884779  
\H,-4.5174668495,4.9441861533,-0.2453342124\H,-2.2565799985,3.89051735  
36,-0.3543228794\H,-6.3042159732,1.0629865613,0.1679209297\H,-4.222436  
7145,-2.2309447926,1.7465819329\H,-5.9403105523,-0.5233588304,-1.79038  
20472\H,-6.0111255387,-3.9547586925,1.7845826519\H,-7.7315176629,-2.23  
07189034,-1.7520484801\H,-7.7739147754,-3.950961992,0.0367475984\H,-6.  
5257999525,3.5097640001,0.0451987216\C,5.9226957249,-2.1300396692,-0.1  
67986218\C,5.9033625444,-3.081742772,-1.3844506726\H,5.1140636859,-3.8  
275707874,-1.2813097334\H,5.733037725,-2.5276874047,-2.3124916749\H,6.  
8641183897,-3.5976898553,-1.470537596\C,6.18385726,-2.9473532926,1.116  
8827883\H,7.1421187986,-3.4693056243,1.0390875678\H,6.22428342,-2.2945  
768783,1.9938985525\H,5.3959143164,-3.685199572,1.2742456328\C,7.03921  
0096,-1.0903690915,-0.3488101797\H,7.0845443532,-0.3994559642,0.494913  
9797\H,8.0019512349,-1.603723197,-0.4274725872\H,6.8927186623,-0.49793  
45256,-1.2543630674\\Version=ES64L-G09RevD.01\State=3-A\HF=-1487.65830  
49\S2=2.032052\S2-1=0.\S2A=2.000589\RMSD=8.142e-09\RMSF=4.040e-06\Dipo  
le=-2.1243175,0.8539275,0.0702331\Quadrupole=10.8462782,0.9242821,-11.  
7705603,9.2819886,-1.264287,-1.5220372\PG=C01 [X(C30H26N6)]\@

### 1[3,7]-T, syn

1\1\GINC-LOCALHOST\FOpt\UB3LYP\6-311G(d,p)\C30H26N6(3)\PIOTR\07-Jan-20  
24\0\#P UB3LYP/6-311G(d,p) FOpt SCF=Direct Geom=(NoDistance,NoAngle)  
fcheck freq #P SCRF=(solvent=Benzene)\3-(3-tBu-1-Ph-benzo[e][1,2,4]tr  
iazinyl-7-)-1-Ph-benzo[e][1,2,4]triazinyl, conformer syn\0,3\C,1.661  
5902934,-1.4807700554,-0.0735959273\C,3.7216677406,-2.4961463955,-0.02  
76168181\C,4.3524765501,-1.2287570422,0.1170453066\C,0.1828728839,-1.5  
79365839,-0.1247884973\C,-0.4292709304,-2.844914846,-0.2279856515\C,-0  
.6138558533,-0.432539083,-0.0672022925\C,-1.8026767411,-2.9602376663,-  
0.2470406053\C,-2.004304473,-0.5407601266,-0.1195350887\C,-2.631454807  
9,-1.8209978396,-0.1752515714\N,-3.9831265047,-1.9617945259,-0.1353542  
037\N,-2.8724891679,0.5514538295,-0.0933503709\N,-4.2235107119,0.39977  
9993,0.0484890017\C,-4.6967095783,-0.8366342868,0.0197708918\C,-2.4405  
85141,1.9138544433,-0.1524632464\C,-2.9255205764,2.8229215072,0.790247  
769\C,-1.584388053,2.3430654279,-1.1690836321\C,-2.5401265515,4.157539  
5082,0.7208722889\C,-1.2011455353,3.6801262642,-1.2264247811\C,-1.6745  
350627,4.5902188661,-0.28305788\N,3.5065447042,-0.1193539726,0.0659804  
31\N,2.1525302978,-0.2416100953,0.0332220618\N,2.3640897061,-2.6141947  
389,-0.1500626658\C,5.7349206005,-1.1470138636,0.3279332928\C,4.526441  
7825,-3.6507431142,-0.0148435152\C,5.89629171,-3.5600529782,0.16320064  
55\C,6.4972651215,-2.3081302259,0.3458749445\C,3.9739530002,1.23414583  
42,0.1036814922\C,3.4463600183,2.1103026458,1.0533211286\C,4.911151036  
9,1.6828592942,-0.8287936261\C,3.8718278145,3.4346348181,1.0768462296\  
C,5.3338332491,3.009075294,-0.7935005147\C,4.8187980414,3.8869146716,0  
.1586933524\H,0.202962586,-3.7205907379,-0.2793764941\H,-0.1368109756,  
0.5318906684,0.0165561039\H,-2.2891243442,-3.9262786102,-0.3023038661\  
H,-3.6032311991,2.4766448198,1.559017206\H,-1.234632861,1.6416095703,-  
1.9157715999\H,-2.9157853289,4.8602671891,1.4556779262\H,-0.5396393228  
,4.0104164522,-2.0187404779\H,-1.3757680772,5.6307468006,-0.333542158\  
H,6.5024028367,-4.4582049878,0.1735210555\H,4.0295079699,-4.6054020238  
, -0.1356505103\H,6.2069143338,-0.1869862158,0.4824123245\H,2.706879878  
8,1.7484349554,1.7555225653\H,5.2916019419,1.0057623896,-1.5833866572\  
H,3.4636311231,4.1131557147,1.8167961949\H,6.0573707254,3.3575495438,-  
1.5212791183\H,5.148455088,4.9190168093,0.1808398623\H,7.5662303212,-2  
.2373908096,0.5081082399\C,-6.2148488247,-1.001212203,0.1564500004\C,-  
6.497600477,-1.9012419184,1.3795309633\H,-5.9936672767,-2.8634463135,1  
.2785734946\H,-6.1509994315,-1.4273552304,2.3028973622\H,-7.5732488089  
, -2.0770776393,1.4732434198\C,-6.7401665541,-1.6934733308,-1.121066725  
4\H,-7.8162048036,-1.8703411648,-1.0338475743\H,-6.5705631329,-1.06808  
41288,-2.0025880473\H,-6.2407161965,-2.6504714551,-1.2783241095\C,-6.9  
28577361,0.3473593148,0.3370536585\H,-6.7506916862,1.0122078263,-0.510  
1076942\H,-8.0057960782,0.1775261476,0.4228577341\H,-6.5905249277,0.86  
21338646,1.2387749726\Version=ES64L-G09RevD.01\State=3-A\HF=-1487.658  
5223\S2=2.032287\S2-1=0.\S2A=2.000595\RMSD=5.918e-09\RMSF=3.113e-06\Di  
pole=2.1155299,1.724286,0.1138155\Quadrupole=5.5286268,3.1859579,-8.71  
45847,0.7727569,-4.2321988,1.1232801\PG=C01 [X(C30H26N6)]\@

### 1[3,7]-T,TS

1\1\GINC-LOCALHOST\FTS\UB3LYP\6-311G(d,p)\C30H26N6(3)\PIOTR\25-Jun-202  
4\0\#P UB3LYP/6-311G(d,p) Opt=QST3 SCF=Direct Geom=(NoDistance,NoAngl  
e) fcheck freq #P SCRF=(solvent=Benzene)\3-(3-tBu-1-Ph-benzo[e][1,2,4  
]triazinyl-7-)-1-Ph-benzo[e][1,2,4]triazinyl, conformer syn\0,3\C,1.  
665910125,-1.4916459558,-0.0929002779\C,3.6750513485,-1.3315538799,-1.  
1761576014\C,4.3567404256,-1.4252825208,0.0694011642\C,0.1727596822,-1  
.6018870362,-0.138679204\C,-0.4365076532,-2.8585562487,-0.2845916326\C  
, -0.6075811289,-0.4549977431,-0.0499542211\C,-1.8143612872,-2.96584630  
13,-0.3120842491\C,-2.0036219077,-0.5517217064,-0.1174948385\C,-2.6324  
744519,-1.8243182788,-0.2123724281\N,-3.9918617594,-1.9582217934,-0.18

21917926\N,-2.8624093021,0.5446884508,-0.0661110059\N,-4.2154334044,0.3987383337,0.0731165456\C,-4.6954743221,-0.8368350314,0.007733837\C,-2.4202865127,1.9042832082,-0.1042486768\C,-2.8995016932,2.8039880905,0.8502560067\C,-1.5585083836,2.3404421291,-1.1135634426\C,-2.5007869924,4.1356327146,0.8015369766\C,-1.1620691075,3.6745237563,-1.1498880154\C,-1.6282131742,4.5748133437,-0.1935679111\N,3.5499934615,-1.4459330216,1.2087514391\N,2.1892240711,-1.5563701187,1.1283438981\N,2.303266812,-1.3331388885,-1.2507039134\C,5.7549345218,-1.5229839736,0.1004875564\C,4.4356984532,-1.2698364186,-2.3573374092\C,5.8179510222,-1.3317710875,-2.3154220729\C,6.4743763048,-1.4718152625,-1.0859883724\C,4.0563804178,-1.4167825729,2.5464196107\C,3.5887140029,-2.3536043703,3.4703107565\C,4.9662895065,-0.4322260551,2.9387913299\C,4.0498564067,-2.3141935596,4.7818695498\C,5.4247327734,-0.4052191307,4.2530613388\C,4.9723675398,-1.3458806892,5.176559955\H,0.1801508615,-3.7459065551,-0.3648388864\H,-0.1322949693,0.5077864618,0.073479528\H,-2.3069128125,-3.9265382827,-0.3980236887\H,-3.5824020798,2.4523373114,1.6119175302\H,-1.215660332,1.647250083,-1.8712704216\H,-2.8713131305,4.8309555937,1.5458745434\H,-0.4973140454,4.0108321882,-1.9370258542\H,-1.31921932,5.6129878407,-0.2275114135\H,6.3915567043,-1.2864852251,-3.2335646146\H,3.8953250519,-1.1893872162,-3.2924954869\H,6.2718528311,-1.6441029713,1.0418423036\H,2.8629771298,-3.0907834152,3.1540875216\H,5.2959695325,0.3159042757,2.2290410608\H,3.6878717382,-3.0441432006,5.4964975655\H,6.1262720577,0.3630007226,4.5567520583\H,5.3294848221,-1.319178469,6.1993278293\H,7.5548351195,-1.54671633,-1.0532742803\C,-6.2154948023,-0.9943447632,0.1415536498\C,-6.5031890366,-1.9328137521,1.3339895168\H,-6.0105427535,-2.8962791606,1.1965262566\H,-6.1466634295,-1.4956297739,2.2715601874\H,-7.580319887,-2.0996115958,1.4271659729\C,-6.7476369592,-1.6395805207,-1.1573829296\H,-7.8256899677,-1.8069910989,-1.0764141841\H,-6.5700177886,-0.9888133618,-2.01870832\H,-6.2584573553,-2.596678215,-1.343879057\C,-6.9195121274,0.3524302785,0.369250849\H,-6.7355269102,1.0461844959,-0.4529869645\H,-7.998120253,0.1876693384,0.4477155061\H,-6.5797733829,0.8323037351,1.2895113126\\Version=ES64L-G16RevC.01\State=3-A\HF=-1487.6473026\S2=2.028271\S2-1=0.\S2A=2.000483\RMSD=8.610e-09\RMSF=9.512e-07\Dipole=2.275267,0.7892489,0.8296776\Quadrupole=4.1056032,-1.9021232,-2.20348,-2.4694,1.981612,-2.4402673\PG=C01 [X(C30H26N6)]\@

### 1[3,7]-S, anti

1\1\GINC-LOCALHOST\FOpt\UB3LYP\6-311G(d,p)\C30H26N6\PIOTR\09-Jan-2024\0\#\P UB3LYP/6-311G(d,p) FOpt SCF=Direct Geom=(NoDistance,NoAngle) fcheck guess(mix,always) #P freq SCRF=(solvent=Benzene)\3-(3-tBu-1-Ph-benzo[e][1,2,4]triazinyl-7-)-1-Ph-benzo[e][1,2,4]triazinyl, conformer anti\0,1\C,1.6627377094,0.0362372277,0.042400668\C,2.9974630927,1.8995910794,0.1746395027\C,4.1588826036,1.08522986,0.0593669758\C,0.3144848547,-0.5820477916,-0.0267600465\C,0.1535987418,-1.9784838914,-0.1315705284\C,-0.8122137479,0.2396812252,0.0167785824\C,-1.1074844653,-2.5359081695,-0.1707671913\C,-2.0917449227,-0.3175411425,-0.0568551225\C,-2.2634694649,-1.7309063823,-0.1183870214\N,-3.498359611,-2.3061215098,-0.1008005022\N,-3.2671556442,0.4317494637,-0.0459676411\N,-4.497309194,-0.151665535,0.0756930576\C,-4.5397878679,-1.4766255595,0.0419178518\C,-3.3018775859,1.860754349,-0.1090351817\C,-4.0771370121,2.5637498124,0.8155270386\C,-2.6115332477,2.5430413019,-1.113265332\C,-4.1461809862,3.9509071538,0.7415174425\C,-2.6839848828,3.9318050595,-1.1753541706\C,-3.4474789567,4.6398972543,-0.2491815416\N,3.9322004947,-0.2940668827,0.0280938585\N,2.683617503,-0.8198294222,-0.042478414\N,1.7400010462,1.3610022648,0.1907231139\C,5.4272170425,1.6692042926,-0.0468937582\C,3.1650479555,3.2952180642,0.2445290907\C,4.4252890077,3.8642755231,0.1711865617\C,5.5546482154,3.0513367788,0.0132166641\C,4.9834759681,-1.



2676251318,0.0051577736\C,4.9870486993,-2.2417815784,-0.9942456427\C,5  
.9643700958,-1.2685488156,0.9985027165\C,5.9857687979,-3.2102831008,-1  
.0046207429\C,6.9620972815,-2.2394742938,0.9760396879\C,6.9774733288,-  
3.2098961945,-0.0243274438\H,1.0326557983,-2.6072443257,-0.164686956\H  
, -0.6688898007,1.3053235414,0.1100969373\H,-1.2502089816,-3.6081359884  
, -0.2261173602\H,-4.6210885962,2.0169244869,1.5739278759\H,-2.03715461  
1,1.9925065051,-1.8472329158\H,-4.7454426196,4.4944960965,1.4627429961  
\H,-2.1505488372,4.4579840221,-1.9583844303\H,-3.5027271471,5.72089641  
94,-0.3027321041\H,4.537059134,4.9408823177,0.2239811458\H,2.272115184  
8,3.9000710666,0.3439573751\H,6.3028691407,1.0496894304,-0.1801218593\  
H,4.2076397183,-2.2342129158,-1.7448608331\H,5.9352696265,-0.528695903  
9,1.7885616643\H,5.9898731501,-3.964866693,-1.7825197277\H,7.719721030  
6,-2.2435810318,1.7509299089\H,7.7538596907,-3.9658096366,-0.035991922  
7\H,6.538786021,3.4972207143,-0.0674707659\C,-5.9238067518,-2.12656717  
69,0.1575040234\C,-5.913857856,-3.0753190197,1.3763347424\H,-5.1243225  
073,-3.8218205174,1.2804084913\H,-5.7496249311,-2.5191666732,2.3042264  
947\H,-6.8756279885,-3.5902602782,1.4568869714\C,-6.1772867015,-2.9465  
407782,-1.1271954458\H,-7.1372955127,-3.4660992061,-1.0551586617\H,-6.  
2097789915,-2.2959404301,-2.0061648357\H,-5.3898055523,-3.6864591034,-  
1.2768471235\C,-7.0402935139,-1.0850907163,0.3282540185\H,-7.079532591  
2,-0.3963608486,-0.5175531656\H,-8.0040578303,-1.5972629877,0.40203230  
58\H,-6.8990850231,-0.4903916787,1.2331438509\\Version=ES64L-G09RevD.0  
1\State=1-A\HF=-1487.6582675\S2=0.989866\S2-1=0.\S2A=0.188161\RMSD=4.2  
20e-09\RMSF=7.507e-06\Dipole=2.0988976,0.81837,-0.0782579\Quadrupole=1  
0.9688773,0.7904494,-11.7593267,-10.1287063,-1.310458,1.4958924\PG=C01  
[X(C30H26N6)]\@

### 1[3,7]-S, *syn*

1\1\GINC-LOCALHOST\FOpt\UB3LYP\6-311G(d,p)\C30H26N6\PIOTR\08-Jan-2024\  
0\\#P UB3LYP/6-311G(d,p) FOpt SCF=Direct Geom=(NoDistance,NoAngle) fch  
eck guess(mix,always) #P freq SCRF=(solvent=Benzene)\3-(3-tBu-1-Ph-be  
nzo[e][1,2,4]triazinyl-7-)-1-Ph-benzo[e][1,2,4]triazinyl, conformer s  
yn\\0,1\C,1.6642096539,-1.4832959947,-0.0750424482\C,3.7245894438,-2.4  
948100922,-0.0377791153\C,4.3534495115,-1.2272128695,0.115134814\C,0.1  
812977999,-1.5837774573,-0.1245192966\C,-0.4306246955,-2.848485497,-0.  
2230708274\C,-0.6134765082,-0.4372257777,-0.0698523902\C,-1.805435328,  
-2.9624675128,-0.2399315319\C,-2.0055277216,-0.5451316912,-0.121023494  
7\C,-2.6320716291,-1.8235132781,-0.1719967258\N,-3.9878694493,-1.96233  
71511,-0.1302025023\N,-2.8709213573,0.5492260355,-0.0958288821\N,-4.22  
14763113,0.4007345633,0.0506530199\C,-4.6967055439,-0.8377813467,0.025  
0095408\C,-2.4365576455,1.9103687561,-0.1634787366\C,-2.9189258707,2.8  
257643654,0.7744944943\C,-1.581171555,2.3321968025,-1.1839343325\C,-2.  
5311226978,4.1591697702,0.6969434246\C,-1.1956464344,3.6682314686,-1.2  
49463906\C,-1.6660626534,4.5845082532,-0.3106485296\N,3.5051943368,-0.  
1195373393,0.0709767211\N,2.1515760997,-0.2448512702,0.0391102078\N,2.  
3670707465,-2.6139311434,-0.1604212202\C,5.7359015698,-1.1437389454,0.  
3268162774\C,4.5319768119,-3.6475027045,-0.0332968139\C,5.9017068169,-  
3.554863802,0.1451098278\C,6.5005889983,-2.3031389021,0.3366329337\C,3  
.9694508608,1.2348300728,0.1149620304\C,3.4377685701,2.1058646233,1.06  
70693092\C,4.9073880321,1.6893660377,-0.8139827027\C,3.8602081204,3.43  
10020274,1.0967936957\C,5.3266299734,3.0164659628,-0.7726327333\C,4.80  
77735708,3.88920244,0.182180881\H,0.2006552931,-3.7249671357,-0.272525  
692\H,-0.1362147114,0.5273256971,0.0117550775\H,-2.2922864296,-3.92857  
47522,-0.2908813782\H,-3.5962886415,2.4850022706,1.5459934784\H,-1.234  
3788741,1.626026284,-1.9275495285\H,-2.904502185,4.8668137375,1.428178  
0855\H,-0.5348517202,3.9928488278,-2.0447043081\H,-1.3655708403,5.6242  
040655,-0.3675483186\H,6.5096341984,-4.4518630432,0.1489830099\H,4.037

3342672,-4.6024987527,-0.1605501284\H,6.2056315406,-0.1837414012,0.488  
2306257\H,2.6977887125,1.7393577693,1.7662997054\H,5.2908629901,1.0162  
772307,-1.5705961185\H,3.4490850926,4.1055457297,1.8387431584\H,6.0505  
958405,3.3696266933,-1.4977084278\H,5.1349342242,4.921978152,0.2091011  
889\H,7.5693953961,-2.2315831807,0.499393052\C,-6.215473357,-0.9970580  
07,0.165625588\C,-6.4981320718,-1.8949591761,1.3902347203\H,-5.9975083  
548,-2.8588129449,1.2887842917\H,-6.1475491354,-1.4214111148,2.3122825  
528\H,-7.5741347568,-2.0670643044,1.4869178826\C,-6.7459080432,-1.6889  
206666,-1.1099673365\H,-7.8224026161,-1.8618314996,-1.0203228924\H,-6.  
5759045564,-1.0651712668,-1.9925817223\H,-6.2499935498,-2.6477648543,-  
1.267062484\C,-6.9249467026,0.353780375,0.3465889183\H,-6.7474828738,1  
.0172454322,-0.5017248644\H,-8.0024114113,0.1869452594,0.435380552\H,-  
6.5832252401,0.8686161724,1.2468903243\\Version=ES64L-G09RevD.01\State  
=1-A\HF=-1487.6573857\S2=1.024715\S2-1=0.\S2A=0.204724\RMSD=3.822e-09\  
RMSF=3.573e-06\Dipole=2.1545697,1.7691466,0.1159457\Quadrupole=5.45351  
82,3.1737501,-8.6272683,0.7615543,-4.1952745,1.1046087\PG=C01 [X(C30H2  
6N6)]\@

### 1[3,7]-S, TS

1\1\GINC-GAUSIANDELL\FTS\UB3LYP\6-311G(d,p)\C30H26N6\PKASZYNSKI\28-Jun  
-2024\0\#\P UB3LYP/6-311G(d,p) Opt=QST3 SCF=Direct Geom=(NoDistance,No  
Angle) fcheck freq #P SCRF=(solvent=Benzene) guess(mix,always)\3-(3-t  
Bu-1-Ph-benzo[e][1,2,4]triazinyl-7-)-1-Ph-benzo[e][1,2,4]triazinyl, c  
onformer syn\0,1\C,1.6699337019,-1.4540188574,-0.0825428656\C,3.67904  
54559,-1.302037013,-1.1661185012\C,4.3605114492,-1.4262371159,0.076879  
843\C,0.1776538846,-1.5704524283,-0.1305346085\C,-0.423450917,-2.83198  
58341,-0.2660156323\C,-0.6089398672,-0.427289419,-0.0520224788\C,-1.80  
09235974,-2.9479853147,-0.2915212182\C,-2.0047224979,-0.5331763297,-0.  
1177840842\C,-2.6255639358,-1.8110218694,-0.2009676424\N,-3.9844141906  
, -1.9523067193,-0.1678589989\N,-2.8698331571,0.557578613,-0.0756609311  
\N,-4.2220900581,0.4055065719,0.0654747937\C,-4.6943831211,-0.83393642  
54,0.0123094288\C,-2.4358904661,1.9196489616,-0.1262512503\C,-2.919794  
6306,2.8243038121,0.8210183575\C,-1.5780058423,2.3523884269,-1.1402639  
669\C,-2.5302439283,4.1581628819,0.7602210036\C,-1.1909646342,3.688862  
7006,-1.188890143\C,-1.6619803417,4.5943927123,-0.2399348882\N,3.55528  
03788,-1.4444309619,1.2173000136\N,2.1929993572,-1.5365944193,1.137437  
3668\N,2.3072692281,-1.280084338,-1.2382069643\C,5.7566149215,-1.55143  
62897,0.1042335159\C,4.4392750876,-1.2357934566,-2.3473332804\C,5.8202  
490349,-1.3229835919,-2.3083420146\C,6.4754930627,-1.4948053703,-1.082  
2636773\C,4.0645460982,-1.4346362853,2.5539281571\C,3.5830789701,-2.36  
99601924,3.4722745025\C,4.9928510063,-0.4692521322,2.9512464728\C,4.04  
87607514,-2.34873585,4.7827118714\C,5.4556100179,-0.4604939748,4.26413  
00933\C,4.9894741891,-1.4000531954,5.1819657964\H,0.1988389876,-3.7160  
63915,-0.3380092651\H,-0.1391097323,0.5392885378,0.0623409499\H,-2.287  
7397936,-3.9123958768,-0.3682084204\H,-3.5994385051,2.4746327626,1.586  
4899932\H,-1.2307338465,1.6546494774,-1.8917795705\H,-2.9043276186,4.8  
574212833,1.4990527251\H,-0.5293614689,4.0226225653,-1.9797754067\H,-1  
.3598863448,5.6342504222,-0.2835101007\H,6.393463465,-1.2734947579,-3.  
2265202396\H,3.8992899527,-1.1319602279,-3.2804046978\H,6.2722837017,-  
1.6968102647,1.0428912627\H,2.843396366,-3.0917623118,3.1528766025\H,5  
.3337642865,0.278334054,2.2462788329\H,3.6758676823,-3.0775777244,5.49  
2858344\H,6.1716390596,0.29284587,4.5713325051\H,5.3501519648,-1.38737  
89515,6.2037619352\H,7.5544177829,-1.5903042275,-1.0523937823\C,-6.213  
2713628,-0.9997807509,0.1491723289\C,-6.4933710152,-1.9312771825,1.349  
0190502\H,-5.9934256343,-2.8920104436,1.2187870713\H,-6.1399989537,-1.  
484333524,2.2832063944\H,-7.5691583612,-2.1054567009,1.444000737\C,-6.  
742650512,-1.6577699481,-1.1443343569\H,-7.8193015097,-1.8328961125,-1

.0604055423\H,-6.5710054116,-1.0113872333,-2.0101284487\H,-6.246382183  
,-2.6122008465,-1.3253340817\C,-6.9260331531,0.343898106,0.3679763794\  
H,-6.7490127343,1.0324941021,-0.4600729195\H,-8.0032604021,0.172157401  
,0.4505649333\H,-6.587699816,0.833275922,1.2837487068\\Version=ES64L-G  
09RevD.01\State=1-A\HF=-1487.647362\S2=1.018685\S2-1=0.\S2A=0.21722\RM  
SD=6.631e-09\RMSF=4.321e-06\Dipole=2.2547268,0.7736672,0.8105826\Quadr  
upole=4.1215405,-1.8452461,-2.2762944,-2.8395767,1.9818965,-2.6194369\  
PG=C01 [X(C30H26N6)]\\

**I[3,6]H,H,Ph -T, anti**

1\1\GINC-GAUSIANDELL\FOpt\UB3LYP\6-311G(d,p)\C26H18N6(3)\PKASZYNSKI\10  
-Jan-2024\0\#\#P UB3LYP/6-311G(d,p) FOpt SCF=Direct Geom=(NoDistance,No  
Angle) fcheck freq #P SCRF=(solvent=Benzene)\3-(3-H-1-Ph-benzo[e][1,2  
,4]triazinyl-6-)-1-Ph-benzo[e][1,2,4]triazinyl, conformer anti\0,3\  
C,-0.4063132409,-1.9725764043,-0.1186899662\C,0.4283732324,-0.84211944  
59,-0.0483806571\C,-1.7852073206,-1.8501161876,-0.1037881721\C,-0.1553  
092367,0.4212371006,0.0099126436\C,-2.3738449877,-0.5798250378,-0.0101  
647989\C,-1.5468806568,0.5808316462,0.0139689796\N,-2.0869527885,1.847  
1423106,0.0148388748\N,-3.7472374504,-0.3622175358,0.0329608699\N,-4.2  
854124904,0.8929236708,-0.0557493516\C,-3.4101443629,1.8916547275,-0.0  
576483003\C,-4.7188359528,-1.410151692,0.1214215346\C,-5.7832350402,-1  
.4251811849,-0.7815905186\C,-4.6336883022,-2.3724421982,1.1296372848\C  
, -6.7521504668,-2.4183452481,-0.6843581589\C,-5.6064603853,-3.36492181  
74,1.214900462\C,-6.6646488334,-3.3936443867,0.3084372143\C,1.90333846  
59,-1.0162581962,-0.0542316381\C,3.7442918294,-2.3839964229,-0.1610363  
149\C,4.5989787048,-1.2460799622,-0.1550829268\N,2.3835080441,-2.26195  
54779,-0.0819785758\N,2.6122629841,0.1143881359,-0.0161345323\N,3.9658  
249905,-0.0108761304,-0.0012096908\C,4.6684036101,1.2307731618,0.12710  
79734\C,4.3256906422,2.295287276,-0.7081201173\C,5.6471869268,1.389658  
3786,1.1101541633\C,4.9783204426,3.51564165,-0.5672396194\C,6.29737967  
12,2.6140113848,1.2394029801\C,5.968079906,3.6779157356,0.4014946896\C  
,4.3274127826,-3.6594848152,-0.27855794\C,5.9807923958,-1.3990327373,-  
0.3272390615\C,5.6974186404,-3.804543359,-0.4147267851\C,6.521405016,-  
2.6725638173,-0.4511107124\H,-2.4031555731,-2.7342232275,-0.1706872002  
\H,0.4550475284,1.3126319909,0.044855839\H,-5.8446591935,-0.6555172574  
, -1.5394032327\H,-3.8263551314,-2.3329653546,1.8500034462\H,-7.5761442  
262,-2.4309516346,-1.388275565\H,-5.5419874255,-4.1079130487,2.0012532  
396\H,-7.4210641956,-4.1663293411,0.3804172376\H,0.0515594299,-2.94968  
99916,-0.1882954321\H,3.5493245629,2.1589632079,-1.4493068307\H,5.8820  
229655,0.5706048599,1.778240131\H,4.7130378645,4.3408122794,-1.2177927  
206\H,7.0521951393,2.738278493,2.0070972674\H,6.4739851265,4.630303918  
2,0.5080819075\H,6.1314997998,-4.7931888941,-0.5060774036\H,6.62390616  
7,-0.5313025812,-0.3684043903\H,3.6623555301,-4.5142924815,-0.27112163  
92\H,7.5912811657,-2.7834713332,-0.5815642724\H,-3.8740764636,2.872190  
3349,-0.1155119533\\Version=ES64L-G09RevD.01\State=3-A\HF=-1330.353946  
5\S2=2.028462\S2-1=0.\S2A=2.000469\RMSD=8.277e-09\RMSF=7.530e-06\Dipol  
e=1.0699092,-0.7889636,-0.0008506\Quadrupole=17.7657702,-3.7593318,-14  
.0064384,16.5853748,3.8524548,-2.9184308\PG=C01 [X(C26H18N6)]\\@

**I[3,6]H,H,Ph -T, syn**

1\1\GINC-GAUSIANDELL\FOpt\UB3LYP\6-311G(d,p)\C26H18N6(3)\PKASZYNSKI\10  
-Jan-2024\0\#\#P UB3LYP/6-311G(d,p) FOpt SCF=Direct Geom=(NoDistance,No  
Angle) fcheck freq #P SCRF=(solvent=Benzene)\3-(3-H-1-Ph-benzo[e][1,2  
,4]triazinyl-6-)-1-Ph-benzo[e][1,2,4]triazinyl, conformer syn\0,3\  
C,0.0432551022,1.0911327655,0.0589585142\C,0.46472588,-0.2489061134,-0.  
0375553807\C,-1.3005766095,1.4213540892,0.07130439\C,-0.4980681384,-1.  
252230219,-0.0958204652\C,-2.2714504952,0.4117795509,-0.0202967741\C,-

1.8667796855,-0.9524266862,-0.0736370361\N,-2.788705804,-1.975667046,-  
0.0736436425\N,-3.6422051677,0.6531357731,-0.0318742791\N,-4.556515369  
8,-0.3609977287,0.0612637221\C,-4.0525869222,-1.5896097422,0.032101685  
6\C,-4.2217597873,1.9610904792,-0.0822740928\C,-5.1968169673,2.3068877  
847,0.8549726934\C,-3.8569954385,2.8601023574,-1.0865592746\C,-5.79238  
28749,3.5623860869,0.7952399681\C,-4.4560098339,4.1161146493,-1.134188  
5451\C,-5.4213286794,4.4722183012,-0.1941957671\C,1.9088645421,-0.6001  
058376,-0.0602149665\C,3.5646165861,-2.1877228811,-0.1475147266\C,4.55  
38480697,-1.1756666777,0.0040241882\N,2.2315804134,-1.8864147037,-0.20  
76467179\N,2.7521548732,0.428608415,0.0603493854\N,4.0814876694,0.1372  
809378,0.025613647\C,4.9366067937,1.284740149,0.0820823854\C,4.7332624  
518,2.2373386818,1.0818601107\C,5.932237023,1.4695989942,-0.8790389475  
\C,5.5410021401,3.3691790679,1.1259659361\C,6.7384058784,2.6034551539,  
-0.822833466\C,6.5475685613,3.5536482794,0.1787595855\C,3.9817513837,-  
3.53069997,-0.2075387864\C,5.9032149714,-1.5228409543,0.151675305\C,5.  
320218962,-3.8636285756,-0.0916471337\C,6.2779580866,-2.859231589,0.09  
96461929\H,-1.5976370402,2.4568426472,0.157650675\H,-0.202319544,-2.29  
06439644,-0.1473852745\H,-5.4841004079,1.5865709339,1.6093729997\H,-3.  
1275923858,2.5723615545,-1.8332745938\H,-6.5472012042,3.8303895582,1.5  
253702676\H,-4.175907441,4.8105157834,-1.917750947\H,-5.8874220141,5.4  
496215592,-0.2373179743\H,0.7877729129,1.8725786387,0.1252472743\H,3.9  
449564555,2.0841946299,1.8071812553\H,6.0617585871,0.7423963028,-1.670  
8201269\H,5.3854559244,4.1065307014,1.9049101193\H,7.5074251531,2.7487  
348473,-1.5725050499\H,7.1752488041,4.4362113524,0.2170805304\H,5.6266  
057876,-4.9019980708,-0.1364828839\H,6.6487267153,-0.7567475853,0.3113  
806913\H,3.2151256658,-4.2853446666,-0.3329574048\H,7.3232836659,-3.12  
08028908,0.2132934892\H,-4.8084805991,-2.3674051626,0.0933178755\\Vers  
ion=ES64L-G09RevD.01\State=3-A\HF=-1330.353264\S2=2.02854\S2-1=0.\S2A=  
2.000471\RMSD=4.710e-09\RMSF=8.424e-06\Dipole=1.6868207,1.9630953,0.12  
39642\Quadrupole=12.1649445,-1.1319931,-11.0329514,-11.5338954,-4.0611  
088,0.0528627\PG=C01 [X(C26H18N6)]\@

**I[3,6]H,H,Ph -S, anti**

1\1\GINC-GAUSIANDELL\FOpt\UB3LYP\6-311G(d,p)\C26H18N6\PKASZYNSKI\10-Jan-2024\0\#\#P UB3LYP/6-311G(d,p) FOpt SCF=Direct Geom=(NoDistance,NoAngle) fcheck guess(mix,always) #P freq SCRF=(solvent=Benzene)\3-(3-H-1-Ph-benzo[e][1,2,4]triazinyl-6)-1-Ph-benzo[e][1,2,4]triazinyl, conformer anti\0,1\C,-0.4046842802,-1.977017285,-0.1291127038\C,0.4294076219,-0.8471248224,-0.0539989986\C,-1.7844443664,-1.8533276219,-0.1151554969\C,-0.153271587,0.4154542902,0.007252157\C,-2.3725406887,-0.5843916175,-0.0174176995\C,-1.5463369707,0.5756165176,0.0098476178\N,-2.08263365,1.8422413489,0.0101058518\N,-3.7488777939,-0.3647754377,0.0264274335\N,-4.2820869624,0.8914428538,-0.0687184271\C,-3.4067562866,1.8887001383,-0.0690997536\C,-4.7219832283,-1.4094863408,0.1197313505\C,-5.7994545565,-1.4142176597,-0.7683086563\C,-4.6268809924,-2.3807005419,1.1190061322\C,-6.7706413071,-2.404479776,-0.6650668546\C,-5.601998108,-3.3702298372,1.2099849766\C,-6.6731284461,-3.3881149712,0.3185220743\C,1.9071396984,-1.0186170967,-0.0573305121\C,3.7487116808,-2.3843172919,-0.1591193365\C,4.6023802438,-1.245419349,-0.153671906\N,2.3876823128,-2.2629825473,-0.0819704195\N,2.6137455461,0.1127584684,-0.0200510455\N,3.9682221164,-0.0112521566,-0.0019851183\C,4.6689369211,1.2311624734,0.1276132238\C,4.3244191733,2.2961534146,-0.7063444177\C,5.6475397762,1.3904983844,1.1108287676\C,4.9752436892,3.5172930846,-0.5641643591\C,6.2957868662,2.6157201466,1.2414203539\C,5.9648116632,3.6800387656,0.4047005423\C,4.3329709559,-3.659474734,-0.2738834128\C,5.9848196178,-1.3976196724,-0.3241156629\C,5.7032015058,-3.8035224818,-0.4081227885\C,6.5263413282,-2.6707448068,-0.4453529313\H,-2.4024352879,-2.737156246

7,-0.1855263246\H,0.4569861115,1.3068302197,0.0451562149\H,-5.8688593156,-0.6385397834,-1.5191947047\H,-3.810011226,-2.350091974,1.8288951856\H,-7.6043817551,-2.4083725279,-1.3575480167\H,-5.5291684958,-4.1195250677,1.9896258781\H,-7.4313058839,-4.1586268413,0.3950228266\H,0.0526146392,-2.9541765356,-0.2011045035\H,3.5481591126,2.1594712942,-1.4475505588\H,5.8835721897,0.5711877856,1.7781596002\H,4.7086653141,4.3427669442,-1.2137981547\H,7.050372949,2.7403203632,2.009281881\H,6.4692223074,4.6330973659,0.5123346385\H,6.1383201987,-4.7918899449,-0.4974094723\H,6.6272516008,-0.5294311878,-0.3660336489\H,3.6686182555,-4.5148135119,-0.2659555058\H,7.5964353648,-2.7810830462,-0.5745086138\H,-3.8685777317,2.8698419162,-0.1315884418\\Version=ES64L-G09RevD.01\State=1-A\HF=-1330.3533258\S2=1.029548\S2-1=0.\S2A=0.238037\RMSD=6.503e-09\RMSF=5.177e-06\Dipole=1.1216363,-0.7520401,0.0018747\Quadrupole=17.6638818,-3.6169005,-14.0469812,16.2112572,3.8486397,-2.9220864\PG=C01 [X(C26H18N6)]\@

**I[3,6]H,H,Ph -S, syn**

1\1\GINC-GAUSIANDELL\FOpt\UB3LYP\6-311G(d,p)\C26H18N6\PKASZYNSKI\10-Jan-2024\0\#\#P UB3LYP/6-311G(d,p) FOpt SCF=Direct Geom=(NoDistance,NoAngle) fcheck guess(mix,always) #P freq SCRF=(solvent=Benzene)\3-(3-H-1-Ph-benzo[e][1,2,4]triazinyl-6)-1-Ph-benzo[e][1,2,4]triazinyl, conformer syn\0,1\C,0.0480779379,1.0882715168,0.0588888213\C,0.4660230447,-0.2521378852,-0.0392534708\C,-1.2965129742,1.4204531512,0.0719324995\C,-0.4969657627,-1.254265149,-0.0999520575\C,-2.2683699426,0.4137218506,-0.0212073976\C,-1.8666040117,-0.9523886213,-0.0766766155\N,-2.7872927355,-1.9728750891,-0.0772250687\N,-3.640325536,0.655927306,-0.0333806807\N,-4.5541504683,-0.3582003479,0.0599516764\C,-4.0530059776,-1.5858440157,0.0298996151\C,-4.2193263616,1.963867217,-0.0821856012\C,-5.1970749886,2.3079676043,0.852968743\C,-3.8512446905,2.865387488,-1.0831393014\C,-5.7922898209,3.5637046282,0.794243589\C,-4.4498749989,4.1215649054,-1.1297029135\C,-5.4180731844,4.4757595076,-0.1918984057\C,1.9084133222,-0.6087062431,-0.0614974732\C,3.5658467146,-2.1935820235,-0.1443573064\C,4.5532858822,-1.1798686104,0.0041845816\N,2.2316615896,-1.8950635695,-0.2046011296\N,2.7498741474,0.4211600888,0.055668186\N,4.0766282617,0.1339008545,0.0242160184\C,4.9301815771,1.283225691,0.0802345938\C,4.7285229855,2.2327980188,1.0830246107\C,5.9219705781,1.4715556244,-0.883997185\C,5.5341843438,3.3661747097,1.1266828048\C,6.7258996269,2.6070269224,-0.8283490552\C,6.5367206599,3.5546316844,0.1760302632\C,3.9873974476,-3.5350359963,-0.2012376766\C,5.9034085249,-1.5214745399,0.1517606931\C,5.3274365255,-3.8635314514,-0.0853851306\C,6.2829648497,-2.8570114795,0.102699045\H,-1.5917018067,2.4563883635,0.1593930188\H,-0.201980441,-2.292767554,-0.1538024446\H,-5.4868066752,1.5861365053,1.6049834722\H,-3.1194820699,2.5794283049,-1.8282015703\H,-6.5492524695,3.8301494829,1.5227292126\H,-4.1671738845,4.8177358112,-1.9107660466\H,-5.8837856443,5.4533812789,-0.2341665833\H,0.7938440287,1.8682905644,0.1256250771\H,3.9434250489,2.076316254,1.8111667462\H,6.0502959773,0.7458869087,-1.6773759649\H,5.3801833033,4.1014633076,1.9078585967\H,7.4920013632,2.7554589085,-1.5803672654\H,7.1628019259,4.4383427182,0.2139561549\H,5.6362552301,-4.9013386678,-0.1280676051\H,6.6463021271,-0.7522949455,0.309018654\H,3.2234380831,-4.2927685073,-0.3243140083\H,7.3290951406,-3.1152880917,0.2159472456\H,-4.8085691533,-2.3637254286,0.0916926685\\Version=ES64L-G09RevD.01\State=1-A\HF=-1330.3536324\S2=1.000141\S2-1=0.\S2A=0.224184\RMSD=7.931e-09\RMSF=7.022e-06\Dipole=1.6680736,1.9920457,0.1272551\Quadrupole=12.31879,-1.3092161,-11.0095739,-10.9175646,-4.0688378,0.0375521\PG=C01 [X(C26H18N6)]\@

**I[3,6]CF<sub>3</sub>,H,Ph -T, anti**

1\1\GINC-GAUSIANDELL\FOpt\UB3LYP\6-311G(d,p)\C27H17F3N6(3)\PKASZYNSKI\10-Jan-2024\0\#\#P UB3LYP/6-311G(d,p) FOpt SCF=Direct Geom=(NoDistance, NoAngle) fcheck freq #P SCRF=(solvent=Benzene)\3-(3-CF3-1-Ph-benzo[e][1,2,4]triazinyl-6-)-1-Ph-benzo[e][1,2,4]triazinyl, conformer anti\0,3\C,-0.411306476,-1.9636225982,-0.0990565836\C,0.4229513371,-0.8321654801,-0.0368066389\C,-1.7906686629,-1.8432695866,-0.08239352\C,-0.1594067768,0.4316293966,0.0153634218\C,-2.3777202954,-0.5738858384,0.0018203345\C,-1.5508966206,0.5868590093,0.0186148284\N,-2.0963623183,1.8489819674,0.0079726405\N,-3.7539929,-0.3575556183,0.0429666022\N,-4.289781744,0.8902284339,-0.0587329808\C,-3.4171673279,1.8812466649,-0.0695841217\C,-4.7244512559,-1.4090794413,0.1363486342\C,-5.7716832517,-1.4491573779,-0.7847654299\C,-4.6458454133,-2.3486652328,1.1654151478\C,-6.7331291888,-2.4493432849,-0.6834802575\C,-5.6112597249,-3.347793495,1.2542285536\C,-6.6531864916,-3.4033134954,0.3303481858\C,1.8985953477,-1.0082569091,-0.0474195663\C,3.7347208437,-2.3795216146,-0.1711005915\C,4.5905897747,-1.2426147134,-0.1646287481\N,2.3741684742,-2.2549711967,-0.0833277692\N,2.6080605437,0.1207919053,-0.0069344741\N,3.9607312445,-0.006702329,-0.0005333041\C,4.6685693072,1.2327088062,0.1274586788\C,4.3378283637,2.295246034,-0.714655099\C,5.64234705,1.3885160329,1.1155876772\C,4.9975464343,3.5120451525,-0.5747500423\C,6.2999700792,2.609014504,1.2435491072\C,5.982478096,3.6714546161,0.3992768519\C,4.3143160744,-3.6550612543,-0.3001620401\C,5.970750446,-1.3961065641,-0.3469219553\C,5.6831285317,-3.8009198148,-0.4481336966\C,6.5082082697,-2.6698005363,-0.4832372336\H,-2.4085543821,-2.7278125189,-0.1416898714\H,0.4506698428,1.3234501932,0.0434356192\H,-5.8276137925,-0.6951827444,-1.5588002842\H,-3.8505157199,-2.2876985162,1.897601409\H,-7.5454061364,-2.4830592632,-1.3999527075\H,-5.5542138708,-4.074499398,2.0560348158\H,-7.4041722277,-4.1809410552,0.4049504694\H,0.0480090862,-2.9403095672,-0.1641639292\H,3.5656193977,2.1608637556,-1.4606663149\H,5.8684213438,0.5703952437,1.7879798429\H,4.7415157259,4.3363324168,-1.2300317569\H,7.0511595096,2.7315628065,2.0150516398\H,6.4938174484,4.6209928763,0.505143666\H,6.1153616703,-4.7893769398,-0.5493350543\H,6.6149802041,-0.5291935668,-0.386797942\H,3.6478779996,-4.5088025686,-0.2931729016\H,7.5769397829,-2.7814763879,-0.6220124855\C,-4.0241418807,3.2756496769,-0.1669052878\F,-5.359688991,3.2553540597,-0.2858964089\F,-3.7233297059,4.0049952492,0.9271899187\F,-3.5313456235,3.9367740266,-1.2345301481\Version=ES64L-G09RevD.01\State=3-A\HF=-1667.488449\S2=2.02811\S2-1=0.\S2A=2.000457\RMSD=6.900e-09\RMSF=3.217e-06\Dipole=1.7141867,-2.0100368,0.0604649\Quadrupole=19.788302,-7.8608695,-11.9274324,24.8147757,3.1649637,-2.4727874\PG=C01 [X(C27H17F3N6)]\@

**I[3,6]CF<sub>3</sub>,H,Ph -T, syn**

1\1\GINC-GAUSIANDELL\FOpt\UB3LYP\6-311G(d,p)\C27H17F3N6(3)\PKASZYNSKI\11-Jan-2024\0\#\#P UB3LYP/6-311G(d,p) FOpt SCF=Direct Geom=(NoDistance, NoAngle) fcheck freq #P SCRF=(solvent=Benzene)\3-(3-CF3-1-Ph-benzo[e][1,2,4]triazinyl-6-)-1-Ph-benzo[e][1,2,4]triazinyl, conformer syn\0,3\C,0.0397936508,1.0852126727,0.0928010381\C,0.4619850671,-0.2546114348,-0.0041028722\C,-1.3041553989,1.4169865591,0.0923107176\C,-0.4987281329,-1.2582740211,-0.0759619602\C,-2.2720822844,0.4085365451,-0.0143668972\C,-1.8662236645,-0.9550274522,-0.0694341504\N,-2.7902508667,-1.9738404497,-0.0868041209\N,-3.6451012605,0.6515363291,-0.0429029936\N,-4.5550491289,-0.3593330889,0.0306320724\C,-4.0499359683,-1.5793949034,0.0033821078\C,-4.2257552639,1.9611421069,-0.0936481458\C,-5.2151877235,2.2984194278,0.8307992067\C,-3.8420504633,2.8649223802,-1.0859109601\C,-5.8073621823,3.5555450748,0.7707076614\C,-4.4381937317,4.1221630356,-1.1331269098\C,-5.4176380275,4.4718720733,-0.2054526221\C,1.9072319

117,-0.6054833422,-0.0175607128\C,3.5635352464,-2.1923369049,-0.084753  
806\C,4.5516201336,-1.1753655419,0.0383388473\N,2.228856501,-1.8942540  
462,-0.137996628\N,2.7477418241,0.4268601336,0.0797821133\N,4.07694725  
33,0.1368954798,0.0466849604\C,4.9317761143,1.2862594105,0.0804242744\  
C,4.7550496068,2.2377312344,1.0858399003\C,5.9002990276,1.4713241683,-  
0.9074216118\C,5.562645743,3.3704072629,1.1079086418\C,6.7064714587,2.  
6061197141,-0.873567897\C,6.5424059948,3.555807931,0.1332032507\C,3.98  
27230457,-3.534814364,-0.1269924809\C,5.9040589913,-1.515993569,0.1704  
57826\C,5.3238171672,-3.8621717089,-0.0250812561\C,6.2814123561,-2.852  
2225392,0.134324681\H,-1.6018814143,2.4521063418,0.1786571735\H,-0.202  
1479116,-2.2962488424,-0.1277193018\H,-5.5158471334,1.5728045257,1.574  
873771\H,-3.1015247474,2.5809085831,-1.8228590364\H,-6.5740210595,3.81  
91093236,1.4897502806\H,-4.1452068089,4.8222780271,-1.9066008624\H,-5.  
8815764371,5.4502138568,-0.2485310764\H,0.7842139998,1.865855792,0.168  
4751698\H,3.9879105915,2.0835528488,1.8334974557\H,6.0092845874,0.7436  
112175,-1.7019646818\H,5.4279470621,4.1074115076,1.8910533796\H,7.4545  
560676,2.7522834039,-1.6439615994\H,7.1700434733,4.4389792805,0.154422  
2643\H,5.6325845609,-4.9002595143,-0.0570108144\H,6.6497770404,-0.7451  
497392,0.3050536946\H,3.2165996394,-4.2933211213,-0.229554643\H,7.3290  
981465,-3.1092599732,0.2356415926\C,-5.0791439008,-2.7027734771,0.0435  
606724\F,-4.7748543512,-3.6009017808,1.0005546897\F,-6.3224432057,-2.2  
602010475,0.2837224221\F,-5.1032331351,-3.3652259756,-1.1325589047\\Ve  
rsion=ES64L-G09RevD.01\State=3-A\HF=-1667.4877678\S2=2.028236\S2-1=0.\  
S2A=2.00046\RMSD=9.751e-09\RMSF=2.582e-06\Dipole=2.6933513,2.9341096,0  
.0946985\Quadrupole=9.3715771,-0.1789749,-9.1926023,-18.3428431,-4.007  
6349,0.0849199\PG=C01 [X(C27H17F3N6)]\@

**I[3,6]CF<sub>3</sub>,H,Ph -S, anti**

1\1\GINC-GAUSIANDELL\FOpt\UB3LYP\6-311G(d,p)\C27H17F3N6\PKASZYNSKI\11-  
Jan-2024\0\#\#P UB3LYP/6-311G(d,p) FOpt SCF=Direct Geom=(NoDistance,NoA  
ngle) fcheck guess(mix,always) #P freq SCRF=(solvent=Benzene)\3-(3-CF  
3-1-Ph-benzo[e][1,2,4]triazinyl-6-)-1-Ph-benzo[e][1,2,4]triazinyl, c  
onformer anti\0,1\C,-0.410352848,-1.9678931795,-0.1044321704\C,0.4233  
926371,-0.8370037599,-0.0381599712\C,-1.7906173446,-1.8463552655,-0.08  
79638735\C,-0.1578786413,0.4260741991,0.0174307214\C,-2.3769608422,-0.  
5782224725,0.0001445475\C,-1.5509266246,0.5819244549,0.0198985297\N,-2  
.0925354044,1.8443406023,0.0089853642\N,-3.7562403194,-0.3596737708,0.  
0417605512\N,-4.2869690148,0.8887031875,-0.0652270759\C,-3.4144608932,  
1.878519457,-0.0745766893\C,-4.7282058233,-1.4084690269,0.1372949903\C  
, -5.7845494703,-1.4400243772,-0.774059728\C,-4.6430410554,-2.355420021  
9,1.1594069184\C,-6.747930266,-2.4380123914,-0.6701016456\C,-5.6104291  
09,-3.3523220293,1.250724613\C,-6.6613011546,-3.3990143471,0.336502290  
2\C,1.9018354988,-1.0102593076,-0.0478311262\C,3.7385091904,-2.3792802  
208,-0.1700656802\C,4.593325526,-1.2413467303,-0.1643258168\N,2.377835  
7746,-2.2555234242,-0.0822548488\N,2.6089411758,0.119642452,-0.0081934  
036\N,3.9627126809,-0.0066800316,-0.0004457461\C,4.6688164448,1.233390  
5464,0.1287465974\C,4.3348781726,2.2971439292,-0.7106656688\C,5.644088  
279,1.3888753837,1.115253316\C,4.9931085783,3.5145897597,-0.569667339  
3\C,6.3000648592,2.6101197398,1.24464194\C,5.9795541957,3.6736595671,0  
.4029028709\C,4.3190779803,-3.6544125246,-0.2983698853\C,5.9738833749,  
-1.3939976813,-0.3471548986\C,5.687884712,-3.7991608851,-0.446613187\C  
,6.5120432921,-2.6671654714,-0.4827976362\H,-2.4085544656,-2.730710430  
6,-0.1501164888\H,0.4521803746,1.3178493641,0.0481673036\H,-5.84569237  
08,-0.6809718399,-1.542684298\H,-3.8411468057,-2.3015593176,1.88489812  
65\H,-7.5669557754,-2.4646501292,-1.3791770804\H,-5.5478672631,-4.0843  
397729,2.0472932059\H,-7.4137140863,-4.1750673442,0.4130507625\H,0.048  
3022453,-2.9446753827,-0.1720896113\H,3.5614710247,2.1630243671,-1.455

454868\H, 5.8724818142, 0.5699590102, 1.7861481523\H, 4.7346951098, 4.33972  
31163, -1.222946436\H, 7.0523532711, 2.732344427, 2.0151226456\H, 6.4896527  
517, 4.6237626954, 0.5096604606\H, 6.1210323049, -4.7872565658, -0.54733363  
78\H, 6.6173731686, -0.5265939391, -0.3880213417\H, 3.6533304246, -4.508677  
1791, -0.2906908807\H, 7.5807902276, -2.778149322, -0.6220484179\C, -4.0186  
752679, 3.2733296938, -0.177691539\F, -5.3539342073, 3.2548789921, -0.29960  
94538\F, -3.7189302018, 4.0058199409, 0.9146330838\F, -3.5222543841, 3.9301  
471767, -1.2464096625\Version=ES64L-G09RevD.01\State=1-A\HF=-1667.4878  
297\S2=1.029338\S2-1=0.\S2A=0.236708\RMSD=4.299e-09\RMSF=4.022e-06\Dip  
ole=1.7434141, -1.9763727, 0.0639182\Quadrupole=19.8420996, -7.8427231, -1  
1.9993765, 24.4775892, 3.1353748, -2.4455835\PG=C01 [X(C27H17F3N6)]\@

**I[3,6]CF<sub>3</sub>H,Ph -S, syn**

1\1\GINC-GAUSIANDELL\FOpt\UB3LYP\6-311G(d,p)\C27H17F3N6\PKASZYNSKI\14-  
Jan-2024\0\#\#P UB3LYP/6-311G(d,p) FOpt SCF=Direct Geom=(NoDistance,NoA  
ngle) fcheck guess(mix,always) #P freq SCRF=(solvent=Benzene)\3-(3-CF  
3-1-Ph-benzo[e][1,2,4]triazinyl-6)-1-Ph-benzo[e][1,2,4]triazinyl, c  
onformer syn\0,1\C, 0.0448088074, 1.0823700883, 0.0906891329\C, 0.4634874  
025, -0.2578486899, -0.0057061954\C, -1.3000816201, 1.4159144888, 0.0907601  
576\C, -0.4974590783, -1.2605384861, -0.0783160604\C, -2.2688708196, 0.4101  
658981, -0.0155757809\C, -1.8658844656, -0.9553624882, -0.0710991482\N, -2.  
7885241167, -1.9716969521, -0.0876876964\N, -3.643374186, 0.6539258545, -0.  
0445240159\N, -4.5525430733, -0.3568989359, 0.0302859069\C, -4.0501086489,  
-1.5761288869, 0.003472388\C, -4.2235379815, 1.9634604539, -0.0943837713\C  
, -5.215194698, 2.2997604884, 0.8281378208\C, -3.8371144183, 2.8690791643, -  
1.0840398785\C, -5.8071605331, 3.5570274386, 0.7684489332\C, -4.432929711,  
4.1264508926, -1.1307612592\C, -5.4148258173, 4.4749006556, -0.2051597068\  
C, 1.906809643, -0.614088795, -0.0185206311\C, 3.5648952985, -2.1980587049,  
-0.083295684\C, 4.5511629334, -1.1795772047, 0.037878701\N, 2.2292100242, -  
1.9028751316, -0.1362069885\N, 2.7457907367, 0.4188924402, 0.0768478356\N,  
4.0720839244, 0.1332493684, 0.0464526132\C, 4.9253881452, 1.2845506913, 0.0  
804060744\C, 4.750234465, 2.2325392154, 1.0891541817\C, 5.8899382696, 1.473  
4746293, -0.9103957002\C, 5.555653119, 3.3668024953, 1.1112477891\C, 6.6937  
226465, 2.6099526369, -0.8766019637\C, 6.5312733546, 3.5566358813, 0.133284  
2864\C, 3.9885995223, -3.5389655178, -0.1241736575\C, 5.9044882128, -1.5147  
488042, 0.1691538214\C, 5.3311714483, -3.8618723759, -0.0228782884\C, 6.286  
5843159, -2.8499203424, 0.1344017445\H, -1.5959351903, 2.4516336833, 0.1764  
666216\H, -0.2016639465, -2.2986895257, -0.1307268946\H, -5.5178387952, 1.5  
732081365, 1.5704945895\H, -3.0946112782, 2.5863249343, -1.8194592213\H, -6  
.5756171576, 3.81950836, 1.4859802911\H, -4.137744621, 4.8277768512, -1.902  
3141131\H, -5.8784470714, 5.4534109437, -0.2478504451\H, 0.7903340609, 1.86  
18872157, 0.1651066944\H, 3.9863473274, 2.0746626859, 1.839410147\H, 5.9976  
721742, 0.7476664259, -1.7068347352\H, 5.4224696995, 4.1014361512, 1.896846  
0762\H, 7.4387787363, 2.7596680339, -1.6492182995\H, 7.1572036182, 4.441009  
7852, 0.1545062959\H, 5.6424926275, -4.8992868821, -0.0538919023\H, 6.64752  
82945, -0.7409901445, 0.3020919448\H, 3.2251697007, -4.3003710104, -0.22526  
81082\H, 7.3350472602, -3.1038308479, 0.2349292791\C, -5.0788762477, -2.699  
2108879, 0.0463214759\F, -4.7771337473, -3.5922631507, 1.009037237\F, -6.32  
29318448, -2.255705138, 0.2803733534\F, -5.0991446411, -3.3680256756, -1.12  
62823271\Version=ES64L-G09RevD.01\State=1-A\HF=-1667.4881376\S2=0.999  
349\S2-1=0.\S2A=0.223137\RMSD=9.899e-09\RMSF=5.307e-06\Dipole=2.722041  
9, 2.9571091, 0.0937719\Quadrupole=9.5541676, -0.3344085, -9.2197591, -17.7  
356338, -3.9866923, 0.0899983\PG=C01 [X(C27H17F3N6)]\@

**I[3,6]Me<sub>2</sub>N,H,Ph -T, anti**

1\1\GINC-GAUSIANDELL\FOpt\UB3LYP\6-311G(d,p)\C28H23N7(3)\PKASZYNSKI\12



-Jan-2024\0\#\#P UB3LYP/6-311G(d,p) FOpt SCF=Direct Geom=(NoDistance,No Angle) fcheck freq #P SCRF=(solvent=Benzene)\3-(3-NMe2-1-Ph-benzo[e][1,2,4]triazinyl-6-)-1-Ph-benzo[e][1,2,4]triazinyl, conformer anti\3\C,-0.4343226784,-1.8830654719,-0.2474116963\C,0.4008308942,-0.7481806843,-0.1987177953\C,-1.809965544,-1.7536485538,-0.2490644748\C,-0.1785535794,0.5170528038,-0.1787065944\C,-2.3960079471,-0.4769056798,-0.1949899875\C,-1.5731711521,0.6866008946,-0.1937745955\N,-2.1061959384,1.94277809,-0.2181395749\N,-3.7624854597,-0.2492483102,-0.1751044546\N,-4.3093988109,0.9921362144,-0.3059507912\C,-3.4362596474,2.0232785555,-0.2998614515\C,-4.7340219189,-1.2989628043,-0.0889485575\C,-5.7568710598,-1.3622390706,-1.0364507622\C,-4.6835727508,-2.2198163157,0.9589045333\C,-6.7187008671,-2.3630348312,-0.9426857229\C,-5.6491892854,-3.2195775292,1.0419031324\C,-6.6660252181,-3.2966278313,0.0919464456\C,1.874622795,-0.9256181375,-0.1856918527\C,3.7124485914,-2.3037072293,-0.2395670769\C,4.5728114685,-1.1704062925,-0.2608580144\N,2.3524445227,-2.1731965995,-0.1721182498\N,2.5906163067,0.2029263519,-0.1753551871\N,3.9440088868,0.0706840875,-0.1449956491\C,4.6524243664,1.3112767682,-0.0469482055\C,4.3246173362,2.3533008216,-0.9160042993\C,5.6242427374,1.4931284475,0.9391054991\C,4.9846291569,3.5729251374,-0.8056550118\C,6.2822641273,2.7161481508,1.0375752974\C,5.9676695316,3.7571818535,0.1659857143\C,4.2902627393,-3.5849020089,-0.3185883172\C,5.9546212262,-1.3347355154,-0.4230476176\C,5.6599871098,-3.7403805512,-0.4459069259\C,6.4896443178,-2.6137425064,-0.5103244454\H,-2.4325746892,-2.6357979124,-0.2996882631\H,0.4376448566,1.404895504,-0.1571460368\H,-5.7900782331,-0.6253805233,-1.8279533764\H,-3.9058116104,-2.1439169099,1.708324648\H,-7.5096828582,-2.4144993393,-1.6819584592\H,-5.611390776,-3.930854328,1.858779363\H,-7.4170216865,-4.0749050269,0.1611902183\H,0.0216115658,-2.8624279283,-0.2876023272\H,3.5534991255,2.2001234113,-1.6594194824\H,5.8482832515,0.6926017938,1.6329404866\H,4.7307200287,4.3801766463,-1.4827874907\H,7.0316899139,2.8576702128,1.807643866\H,6.4795965127,4.7087689464,0.2486262129\H,6.0896058385,-4.7332869062,-0.5082962389\H,6.6023401725,-0.4716919326,-0.4855094912\H,3.6204585986,-4.435617052,-0.2900680406\H,7.559515486,-2.7332200856,-0.6335673609\N,-4.0089039341,3.2693948205,-0.3579589113\C,-5.4431024443,3.4283041424,-0.5392825587\H,-5.977830242,2.6368538364,-0.020489981\H,-5.7415594476,4.3944058077,-0.1260538736\H,-5.7312620607,3.4030497679,-1.5996570702\C,-3.1931366154,4.4465547016,-0.6134969006\H,-2.1580710535,4.2266162743,-0.3715084106\H,-3.2538152284,4.7550201179,-1.6666164069\H,-3.5446296876,5.2758507577,0.0069443047\Version=ES64L-G09RevD.01\State=3-A\HF=-1464.3717023\S2=2.028012\S2-1=0.\S2A=2.000448\RMSD=5.913e-09\RMSF=9.758e-07\Dipole=0.3313355,0.1655577,-0.103781\Quadrupole=19.6951224,-1.0626146,-18.6325078,7.963302,4.7235502,-3.9825854\PG=C01 [X(C28H23N7)]\@

### I[3,6]Me<sub>2</sub>N,H,Ph -T, syn

1\1\GINC-GAUSIANDELL\FOpt\UB3LYP/6-311G(d,p)\C28H23N7(3)\PKASZYNSKI\12  
-Jan-2024\0\#\#P UB3LYP/6-311G(d,p) FOpt SCF=Direct Geom=(NoDistance,No Angle) fcheck freq #P SCRF=(solvent=Benzene)\3-(3-NMe2-1-Ph-benzo[e][1,2,4]triazinyl-6-)-1-Ph-benzo[e][1,2,4]triazinyl, conformer syn\3\C,0.0155168775,1.0442378527,-0.0823027352\C,0.4321102651,-0.2986904879,-0.1964221205\C,-1.326210974,1.3737488974,-0.0851563059\C,-0.5306276471,-1.2982602834,-0.2892275416\C,-2.2981833214,0.3651965321,-0.2095279717\C,-1.9035964695,-1.0002293238,-0.2840120773\N,-2.8206760821,-2.011849473,-0.3348330203\N,-3.6635402025,0.6025443938,-0.2407171492\N,-4.5915421765,-0.3946315858,-0.2149778996\C,-4.1031046209,-1.6550874007,-0.2466004835\C,-4.2342609494,1.9168188195,-0.2622076792\C,-5.1867468078,2.2605702363,0.6982320445\C,-3.8751810685,2.8258662759,-1.2585737577\C,-5.7661104987,3.5250227824,0.669300009\C,-4.4583074054,4.090334457

6,-1.2769680039\C,-5.4014563758,4.4443524274,-0.3139254387\C,1.874771164,-0.6527661744,-0.2052109498\C,3.5329411483,-2.2407018863,-0.2848577776\C,4.5225264404,-1.229977466,-0.126171765\N,2.2007702314,-1.9395190494,-0.3519745612\N,2.7202103749,0.3746979782,-0.0763530402\N,4.049976031,0.0821435931,-0.1024190882\C,4.9042533862,1.2295562228,-0.0401647142\C,4.6954226455,2.181533181,0.9591630176\C,5.9042207331,1.4167922228,-0.9962652726\C,5.5017293926,3.3141634752,1.0080663657\C,6.7087904953,2.551591195,-0.9355791182\C,6.5128222266,3.5006676343,0.06601516\C,3.9505514825,-3.5836620697,-0.3469731113\C,5.87148213,-1.5785387525,0.024707842\C,5.2883781934,-3.9180261576,-0.2279262339\C,6.2461524356,-2.914780478,-0.0305367755\H,-1.6255362225,2.4076567424,0.0146877161\H,-0.2325047125,-2.3348813687,-0.3579780927\H,-5.4644231073,1.5344347977,1.4508845186\H,-3.1589848269,2.5393610398,-2.018370431\H,-6.5020643068,3.7931413603,1.4184946481\H,-4.1825016428,4.7937455151,-2.0540102481\H,-5.8549423376,5.4284849569,-0.3333290001\H,0.760605971,1.8223578296,0.0081236768\H,3.9028382719,2.0275219957,1.6796493065\H,6.0383258355,0.690753006,-1.7883969064\H,5.3408375649,4.0508700035,1.7866076642\H,7.480808549,2.698545822,-1.6819397349\H,7.1392476058,4.3840009833,0.1079816804\H,5.5942951962,-4.956487272,-0.2753591788\H,6.6167606926,-0.8129822959,0.1888965549\H,3.183636482,-4.3370821714,-0.477755309\H,7.2911026861,-3.176993509,0.0855099866\N,-5.0490327981,-2.6489778921,-0.1806972037\C,-6.4671301944,-2.3459792384,-0.305902493\H,-7.0379412248,-3.1136623843,0.2216512843\H,-6.685048442,-1.3756352562,0.1305901763\H,-6.7920603936,-2.3346079224,-1.3559311103\C,-4.6696117849,-4.0323234858,-0.4256425511\H,-4.799201718,-4.3078055099,-1.4818830897\H,-3.6277994373,-4.1773419396,-0.1567859006\H,-5.2998968613,-4.6880927951,0.1804494402\\Version=ES64L-G09RevD.01\State=3-A\HF=-1464.3710246\S2=2.027914\S2-1=0.\S2A=2.000444\RMSD=6.715e-09\RMSF=5.490e-06\Dipole=0.6619903,1.2867238,0.0817538\Quadrupole=19.2978417,-0.9474252,-18.3504165,-0.1504102,-3.1608662,0.8636599\PG=C01 [X(C28H23N7)]\@

**I[3,6]Me<sub>2</sub>N,H,Ph -S, anti**

1\1\GINC-GAUSIANDELL\FOpt\UB3LYP\6-311G(d,p)\C28H23N7\PKASZYNSKI\12-Jan-2024\0\#\#P UB3LYP/6-311G(d,p) FOpt SCF=Direct Geom=(NoDistance,NoAngle) fcheck guess(mix,always) #P freq SCRF=(solvent=Benzene)\3-(3-NMe2-1-Ph-benzo[e][1,2,4]triazinyl-6-)-1-Ph-benzo[e][1,2,4]triazinyl, conformer anti\0,1\C,-0.4336619572,-1.887758361,-0.2566878976\C,0.4008807767,-0.7536455539,-0.1982137732\C,-1.810076574,-1.7574179727,-0.2593185844\C,-0.1776535075,0.510539628,-0.1700863013\C,-2.3958866997,-0.4821085192,-0.1961420918\C,-1.573734472,0.6804240571,-0.1863432018\N,-2.103130467,1.937409838,-0.2051139028\N,-3.7650679279,-0.2526581553,-0.1758240746\N,-4.3069280542,0.9907758476,-0.3101120025\C,-3.4333399199,2.0202340509,-0.2953356523\C,-4.7384098868,-1.2992347826,-0.0913205967\C,-5.7739279956,-1.3468954781,-1.0264468794\C,-4.6792325532,-2.2343308272,0.9439009996\C,-6.7384536223,-2.3450713293,-0.9334400029\C,-5.6476583038,-3.2313203478,1.0259669811\C,-6.6767394024,-3.292464076,0.088063894\C,1.8778740536,-0.9287398419,-0.1832138184\C,3.7166192378,-2.3039282777,-0.2307488951\C,4.5755046737,-1.1694002241,-0.2569848936\N,2.3564328915,-2.174609989,-0.1633986668\N,2.5910413121,0.2006009544,-0.1776856286\N,3.9449767736,0.0707116971,-0.1454375256\C,4.6510320437,1.3128285367,-0.0508429281\C,4.3194743807,2.3525914425,-0.9212430537\C,5.6240892607,1.4984613261,0.9333212326\C,4.9772745119,3.573680782,-0.8143182162\C,6.2796517494,2.723043869,1.0284417744\C,5.9615303929,3.7617640235,0.1553731595\C,4.2963063977,-3.5845099976,-0.3044989371\C,5.9577042107,-1.3323468822,-0.4194650112\C,5.6661879399,-3.7383530759,-0.4318790044\C,6.4943546121,-2.6107686261,-0.501663892\H,-2.4324316071,-2.6392966314,-0.3176485482\H,0.4381674659,1.3984796274,-0.141595686\H,-5.81

42418617,-0.599797782,-1.8078866649\H,-3.8927538669,-2.1710322637,1.68  
52744382\H,-7.5387645005,-2.3837889947,-1.6634309443\H,-5.6024922597,-  
3.9530091121,1.8333127908\H,-7.4298404011,-4.0687554632,0.1566604943\H  
,0.0217427372,-2.8670691546,-0.3033371973\H,3.5473531668,2.1964256462,  
-1.6629681566\H,5.8508252581,0.6997929641,1.6284027648\H,4.720631609,4  
.3791255952,-1.4925628162\H,7.0299633758,2.8675875212,1.7970764088\H,6  
.4716296966,4.7145504212,0.235395932\H,6.0972618652,-4.7308700764,-0.4  
902855432\H,6.6040392207,-0.4685868977,-0.4861345752\H,3.627855339,-4.  
4361364403,-0.2720722615\H,7.5642840114,-2.7293652001,-0.6251733253\N,  
-4.0030913925,3.2678927188,-0.3532321505\C,-5.4362645226,3.4288480555,  
-0.5404771138\H,-5.9745042995,2.6408572713,-0.0199005608\H,-5.73406066  
51,4.3973934545,-0.1326266289\H,-5.7210607885,3.3991906766,-1.60166201  
14\C,-3.1842843225,4.4433382303,-0.6073051666\H,-2.1504727258,4.222112  
6198,-0.3611342295\H,-3.240513154,4.7507938564,-1.6609950968\H,-3.5365  
122129,5.2739266725,0.010944969\Version=ES64L-G09RevD.01\State=1-A\HF  
=-1464.3709154\S2=1.026317\S2-1=0.\S2A=0.212813\RMSD=6.351e-09\RMSF=3.  
116e-06\Dipole=0.3999182,0.2065598,-0.112619\Quadrupole=19.6180656,-0.  
9539399,-18.6641258,7.6832782,4.7544846,-4.0041705\PG=C01 [X(C28H23N7)  
]\@

**I[3,6]Me<sub>2</sub>N,H,Ph -S, syn**

1\1\GINC-GAUSIANDELL\FOpt\UB3LYP\6-311G(d,p)\C28H23N7\PKASZYNSKI\13-Ja  
n-2024\0\#\#P UB3LYP/6-311G(d,p) FOpt SCF=Direct Geom=(NoDistance,NoAng  
le) fcheck guess(mix,always) #P freq SCRF=(solvent=Benzene)\3-(3-NMe2  
-1-Ph-benzo[e][1,2,4]triazinyl-6-)-1-Ph-benzo[e][1,2,4]triazinyl, co  
nformer syn\0,1\C,0.0205245921,1.0405836263,-0.0857516293\C,0.4337790  
042,-0.3028948066,-0.1992560398\C,-1.3216187818,1.3723527319,-0.087657  
772\C,-0.5289728172,-1.3011930919,-0.291460308\C,-2.2951599671,0.36641  
17613,-0.2107967458\C,-1.9029942957,-1.0008315144,-0.2844354398\N,-2.8  
186185551,-2.0102743066,-0.3311079427\N,-3.6610776612,0.6042939744,-0.  
2426088445\N,-4.5890192923,-0.3934781397,-0.2151964105\C,-4.1029143728  
, -1.65253967,-0.2420827967\C,-4.2315990281,1.9181874105,-0.2669319303\  
C,-5.189913656,2.2616712224,0.6879360619\C,-3.8666890531,2.8280321105,  
-1.260628756\C,-5.7693189297,3.5260217226,0.656059577\C,-4.4499026608,  
4.0923467703,-1.2819325955\C,-5.3989332848,4.445901052,-0.3244705991\C  
,1.8750671517,-0.6629292094,-0.2086008806\C,3.535245467,-2.2470188462,  
-0.2887960096\C,4.5226213071,-1.2348447445,-0.1290120624\N,2.201799260  
8,-1.9489097418,-0.3558584369\N,2.7178370908,0.3655856898,-0.079016680  
6\N,4.0449951442,0.0781536035,-0.1028657999\C,4.8970906939,1.227658955  
6,-0.0376604259\C,4.6885835275,2.1743429058,0.9665426162\C,5.894025530  
3,1.4208765749,-0.995578939\C,5.4921473231,3.3088564645,1.0180416528\C  
,6.6956935742,2.5575715372,-0.9323717101\C,6.499956289,3.5018632178,0.  
0738235218\C,3.9583202151,-3.5878813469,-0.3521254502\C,5.8723064169,-  
1.577373592,0.021675752\C,5.2979357325,-3.9174263059,-0.2331663784\C,6  
.2528798464,-2.9124207965,-0.0347747828\H,-1.6187849716,2.4069403771,0  
.0114229274\H,-0.2317508317,-2.3380391426,-0.3603193863\H,-5.471903671  
,1.5353660465,1.4387885527\H,-3.1459361019,2.5422290846,-2.0163365137\  
H,-6.5097791086,3.7936429088,1.4009868537\H,-4.1695445605,4.7960992116  
, -2.0570400937\H,-5.8524010072,5.4299908556,-0.3461510921\H,0.76703224  
84,1.8173508742,0.0031443618\H,3.8986670856,2.0149958471,1.6888460296\  
H,6.0279659836,0.6980768705,-1.7906766095\H,5.3317361413,4.0417477811,  
1.8002532008\H,7.4653954599,2.7096658883,-1.6800706897\H,7.1242742154,  
4.3865841889,0.1178270886\H,5.6067689179,-4.9550542347,-0.2818312513\H  
,6.6143210355,-0.8087094396,0.1865038739\H,3.1947078706,-4.3445070414,  
-0.4838218489\H,7.2986991686,-3.1710944326,0.08075961\N,-5.0476596088,  
-2.6470804776,-0.1705303955\C,-6.465804334,-2.3401843398,-0.2846480257  
\H,-7.0348812414,-3.123085725,0.2215644844\H,-6.6833508419,-1.38303022

49,0.1808597623\H,-6.7935632165,-2.2970993706,-1.3329468776\C,-4.67132  
93534,-4.0296510106,-0.4256911875\H,-4.8143327588,-4.3011113974,-1.481  
2506471\H,-3.6262911984,-4.1755655364,-0.1703381529\H,-5.2934712817,-4  
.6880341796,0.1859074615\\Version=ES64L-G09RevD.01\State=1-A\HF=-1464.  
3712461\S2=0.995505\S2-1=0.\S2A=0.198741\RMSD=8.347e-09\RMSF=5.330e-06  
\Dipole=0.6121817,1.3226374,0.0835743\Quadrupole=19.3450718,-1.0730649  
, -18.272007,0.6552245,-3.1594378,0.8577918\PG=C01 [X(C28H23N7)]\@

**I[3,6]Me<sub>2</sub>N,CF<sub>3</sub>,Ph -T, anti**

1\1\GINC-GAUSIANDELL\FOpt\UB3LYP\6-311G(d,p)\C29H22F3N7(3)\PKASZYNSKI\  
14-Jan-2024\0\#\#P UB3LYP/6-311G(d,p) FOpt SCF=Direct Geom=(NoDistance,  
NoAngle) fcheck freq #P SCRF=(solvent=Benzene)\3-(3-NMe2-1-Ph-benzo[e]  
][1,2,4]triazinyl-6-)-1-Ph-7-CF3\_benzo[e][1,2,4] triazinyl, conformer  
anti\0,3\C,-0.6181726143,-1.8196773677,-0.0835866667\C,0.2554507716,-  
0.714899305,-0.0185899364\C,-1.9882949558,-1.6433539209,-0.0678712282\  
C,-0.2794049783,0.5693002484,0.0407693733\C,-2.5293274013,-0.348683586  
5,0.0232282964\C,-1.6670082656,0.7861897509,0.0488790501\N,-2.15660142  
4,2.0594919315,0.0693749759\N,-3.8856624807,-0.0754000616,0.0592654247  
\N,-4.3919765592,1.1870022916,-0.0160858551\C,-3.4843935422,2.18845036  
42,0.0148387043\C,-4.8932821192,-1.0946759071,0.1061306543\C,-5.902966  
8316,-1.098160775,-0.856908904\C,-4.8897246971,-2.041593016,1.13121364  
8\C,-6.901666205,-2.0650057814,-0.8007671782\C,-5.8918137314,-3.007564  
0438,1.176301304\C,-6.8973375525,-3.0240300274,0.2115771201\C,1.719785  
1452,-0.9410221184,-0.0308467032\C,3.5059589054,-2.3805305069,-0.12835  
44079\C,4.4047836484,-1.2774325681,-0.1491418306\N,2.1569437205,-2.206  
0159444,-0.0404108679\N,2.4760179796,0.1612549255,-0.0192742649\N,3.82  
27804696,-0.0178229426,-0.0141175625\C,4.5807349177,1.1963043248,0.073  
283189\C,4.3017312682,2.2366539726,-0.8134728466\C,5.5542280302,1.3469  
924918,1.0620124741\C,5.0151538838,3.4270756403,-0.7175685465\C,6.2653  
263399,2.5410714012,1.1460916779\C,6.0004425865,3.5810543901,0.2570575  
989\C,4.0413968241,-3.6803700618,-0.2294198044\C,5.7763860401,-1.48223  
87873,-0.3309656054\C,5.3994782945,-3.8817807798,-0.3762598282\C,6.264  
8138648,-2.7791530908,-0.4388346728\H,-2.6414050012,-2.5020699085,-0.1  
335923883\H,0.3669434787,1.4349540613,0.0770613752\H,-5.8984377145,-0.  
3419710489,-1.6307570353\H,-4.1207853091,-2.0118489622,1.8930670111\H,  
-7.6832636363,-2.07002233,-1.551654202\H,-5.8914038602,-3.7394943098,1  
.9756041733\H,-7.6769029949,-3.7757790739,0.2520047924\H,-0.197051804,  
-2.8129632477,-0.1512463934\H,3.5292921878,2.1052962616,-1.5597478174\  
H,5.739729804,0.5469520055,1.7679053664\H,4.8019114853,4.234537923,-1.  
4081448156\H,7.0179386017,2.6605379105,1.9164941676\H,6.5543774737,4.5  
097464511,0.3275970563\H,5.7963425674,-4.8854916275,-0.4613538936\H,6.  
4530963064,-0.6436490494,-0.3962065129\H,3.3473792603,-4.5107903527,-0  
.2030942882\N,-4.0144025389,3.4534707942,0.0149139916\C,-5.4432011273,  
3.6717144637,-0.1498484368\H,-6.0027883181,2.8624069481,0.311532614\H,  
-5.7103998797,4.6147055178,0.3325469689\H,-5.7311268439,3.7330437203,-  
1.2087282348\C,-3.1592814316,4.6136878986,-0.183809171\H,-2.1356511957  
,4.3560696006,0.0691910794\H,-3.1901020834,4.9614649225,-1.2258299998\  
H,-3.4998058329,5.4295075181,0.4598012358\C,7.7400098305,-3.0136660451  
, -0.5819570894\F,8.3052104737,-3.4103442524,0.5867066644\F,8.406293840  
9,-1.9065818433,-0.976106078\F,8.0130061894,-3.9856644059,-1.482523861  
5\\Version=ES64L-G09RevD.01\State=3-A\HF=-1801.5109542\S2=2.028057\S2-  
1=0.\S2A=2.000454\RMSD=3.805e-09\RMSF=5.110e-06\Dipole=-1.2520179,0.69  
08881,0.013547\Quadrupole=3.0547902,6.898852,-9.9536422,17.5161618,6.6  
119883,-4.4684685\PG=C01 [X(C29H22F3N7)]\@

**I[3,6]Me<sub>2</sub>N,CF<sub>3</sub>,Ph -T, syn**

1\1\GINC-GAUSIANDELL\FOpt\UB3LYP\6-311G(d,p)\C29H22F3N7(3)\PKASZYNSKI\15-Jan-2024\0\#\#P UB3LYP/6-311G(d,p) FOpt SCF=Direct Geom=(NoDistance, NoAngle) fcheck freq #P SCRF=(solvent=Benzene)\3-(3-NMe2-1-Ph-benzo[e][1,2,4]triazinyl-6-)-1-Ph-7-CF3\_benzo[e][1,2,4] triazinyl, conformer syn\0,3\C,0.179871227,0.9871865789,-0.0685242472\C,-0.2943232831,-0.3388964766,0.0181696062\C,1.5347473713,1.2557535763,-0.0769597448\C,0.6232180263,-1.3835493781,0.0717173804\C,2.4616545773,0.2012274308,0.0062812132\C,2.0077126437,-1.1472701018,0.0515317778\N,2.8790117581,-2.198841859,0.0602879741\N,3.8355027186,0.3765770195,0.0227121985\N,4.7182682511,-0.6587009641,-0.0422207746\C,4.1750027557,-1.8976427336,-0.0388145979\C,4.464033755,1.6642886118,0.0718455122\C,5.4043994126,1.9996912453,-0.9029349052\C,4.172639663,2.5518307128,1.1086077213\C,6.0415806689,3.2350340622,-0.8463123691\C,4.8134054751,3.7874027715,1.1546817153\C,5.746182632,4.1332195332,0.1787220083\C,-1.7486384004,-0.6292844616,0.036946067\C,-3.4685279523,-2.1482603591,0.1065347357\C,-4.4165667743,-1.0952243031,-0.0331144517\N,-2.1294628896,-1.9048510429,0.1694633015\N,-2.5533189265,0.432869651,-0.0706808138\N,-3.8922742952,0.1953478118,-0.0412590719\C,-4.7030174819,1.3769286199,-0.0844453852\C,-4.468442415,2.3262693978,-1.0798433387\C,-5.6843075742,1.5916670088,0.8846886803\C,-5.232771582,3.4882339936,-1.1112002933\C,-6.4469160209,2.75579161,0.8408422936\C,-6.2254939996,3.7041201116,-0.1560413239\C,-3.9434564223,-3.4743388332,0.1516887895\C,-5.7771386388,-1.3813762091,-0.1851258611\C,-5.2909398631,-3.7522066218,0.033905924\C,-6.2052246166,-2.703618167,-0.1463591862\H,1.8799199017,2.2772333598,-0.1543922794\H,0.2795147926,-2.4071931972,0.1196301635\H,5.6289182685,1.289889935,-1.6882751466\H,3.4647029959,2.2708486442,1.8783438085\H,6.7685658773,3.4969148223,-1.6063604385\H,4.5906200491,4.4738779071,1.963249962\H,6.2446883262,5.0946224308,0.2200167901\H,-0.5303281626,1.8000400886,-0.129420569\H,-3.6911610189,2.1475641746,-1.8111650596\H,-5.8368067313,0.8649201364,1.6729148584\H,-5.0543971376,4.2243215886,-1.8863023787\H,-7.205990362,2.9248365419,1.595447863\H,-6.8197114051,4.609835419,-0.1850891246\H,-5.6424202403,-4.7755962369,0.0614248853\H,-6.4915660121,-0.5868724586,-0.3406907019\H,-3.2115913197,-4.2637092583,0.2662530611\N,5.073323526,-2.9294296961,-0.147560632\C,6.5069410686,-2.6948579651,-0.058922014\H,7.0252964741,-3.463924289,-0.6364110807\H,6.7542337468,-1.717461908,-0.4625496161\H,6.8650945151,-2.7428269642,0.9790202197\C,4.6388536206,-4.30236123,0.0627350457\H,4.7998638395,-4.6221571958,1.101859925\H,3.5810557714,-4.3885821793,-0.1656258757\H,5.2115272188,-4.9635434376,-0.5928294646\C,-7.6705739083,-3.0123928303,-0.2439386456\F,-8.2362575954,-3.1705305304,0.9800821503\F,-8.366135397,-2.0334834825,-0.8636254199\F,-7.9043349716,-4.1589245148,-0.9212106501\Version=ES64L-G09RevD.01\State=3-A\HF=-1801.5101926\S2=2.027984\S2-1=0.\S2A=2.000453\RMSD=8.607e-09\RMSF=3.145e-06\Dipole=0.9482227,1.861725,-0.0015491\Quadrupole=1.1514852,8.3806609,-9.532146,-9.3787684,-4.6173055,-0.7039656\PG=C01 [X(C29H22F3N7)]\@

**I[3,6]Me<sub>2</sub>N,CF<sub>3</sub>,Ph -S, anti**

1\1\GINC-GAUSIANDELL\FOpt\UB3LYP\6-311G(d,p)\C29H22F3N7\PKASZYNSKI\15-Jan-2024\0\#\#P UB3LYP/6-311G(d,p) FOpt SCF=Direct Geom=(NoDistance, NoAngle) fcheck guess(mix,always) #P freq SCRF=(solvent=Benzene)\3-(3-NMe2-1-Ph-benzo[e][1,2,4]triazinyl-6-)-1-Ph-7-CF3\_benzo[e][1,2,4] triazinyl, conformer anti\0,1\C,-0.6183625439,-1.8234739962,-0.0916952682\C,0.255097519,-0.7197968889,-0.0172718863\C,-1.989000509,-1.6459959594,-0.0771501269\C,-0.2788260986,0.5633373787,0.049461425\C,-2.5294538035,-0.3525999093,0.0223493453\C,-1.6675850232,0.7808451153,0.0563197249\N,-2.1538279974,2.0549508342,0.0824734017\N,-3.8881211602,-0.0776357774,0.0582772404\N,-4.3899568497,1.1865970794,-0.019022935\C,-3.48158415

08, 2.1862854386, 0.0204803434\C, -4.8971662098, -1.0942511917, 0.1023118\C, -5.9161263022, -1.0844456154, -0.8512982372\C, -4.8873665697, -2.0534466781, 1.1163068865\C, -6.9169292992, -2.0491457474, -0.7970054528\C, -5.8915969594, -3.0171785601, 1.1593836591\C, -6.9061339987, -3.019991506, 0.2039586661\C, 1.7224369245, -0.9450238927, -0.0269564644\C, 3.5093948762, -2.3822480699, -0.1169515825\C, 4.4069649603, -1.2780854443, -0.1456111011\N, 2.1604439867, -2.20873267, -0.0275736675\N, 2.4761942805, 0.1577789131, -0.0222547186\N, 3.8229519758, -0.0187384874, -0.0154520089\C, 4.5787595276, 1.1969762134, 0.0676644423\C, 4.2942721024, 2.2356225201, -0.8194058192\C, 5.5554345614, 1.3508606943, 1.052812755\C, 5.0056228401, 3.4275653872, -0.7275510196\C, 6.264165031, 2.54658147, 1.1328968376\C, 5.9939962433, 3.5848423161, 0.2434232036\C, 4.0470258421, -3.6816542661, -0.2114502214\C, 5.7784823095, -1.4813445855, -0.3297647863\C, 5.4051812667, -3.8813763959, -0.3602537066\C, 6.2689027118, -2.7779538679, -0.4314144264\H, -2.6421762105, -2.5040757543, -0.150406511\H, 0.3673243669, 1.4288824298, 0.0924464786\H, -5.9167446104, -0.3193884387, -1.6163402142\H, -4.1120584588, -2.0345404875, 1.8719780417\H, -7.7053871998, -2.0432584763, -1.5407090846\H, -5.8858819011, -3.7581095925, 1.9503532013\H, -7.6873806483, -3.7700685895, 0.2428858588\H, -0.1979102367, -2.816634603, -0.1653623096\H, 3.5195000672, 2.1016563077, -1.5627618321\H, 5.7450183497, 0.5522330229, 1.7591830944\H, 4.7883360061, 4.2336671088, -1.4184439269\H, 7.0191372277, 2.6686504332, 1.9005644636\H, 6.5462323554, 4.5147712441, 0.3108264333\H, 5.8034211395, -4.884974531, -0.4403943272\H, 6.4534828408, -0.6419106118, -0.4015395801\H, 3.3546929435, -4.5132402379, -0.178800003\N, -4.0093138439, 3.4524455627, 0.02171773\C, -5.4371153177, 3.6727403873, -0.148651197\H, -5.9998743369, 2.8663615918, 0.3141414083\H, -5.7038744498, 4.6180937109, 0.3292594503\H, -5.7218139233, 3.7303753322, -1.208622289\C, -3.1516338804, 4.6114070289, -0.1734651802\H, -2.129139158, 4.3517603183, 0.0820294209\H, -3.1790699947, 4.9605449378, -1.2151487738\H, -3.4922693961, 5.4270807164, 0.4702628337\C, 7.7439354684, -3.0110909288, -0.5772185367\F, 8.3127631313, -3.4023452976, 0.5915572036\F, 8.4077358932, -1.9046355911, -0.9774534228\F, 8.0160755534, -3.9863301636, -1.4745516721\\Version=ES64L-G09RevD.01\State=1-A\HF=-1801.5101608\S2=1.024434\S2-1=0.\S2A=0.209165\RMSD=9.766e-09\RMSF=4.183e-06\Dipole=-1.1965568, 0.7311135, 0.0049412\Quadrupole=2.7764736, 7.1281687, -9.9046423, 17.3516136, 6.6579739, -4.4857314\PG=C01 [X(C29H22F3N7)]\@

**I[3,6]Me<sub>2</sub>N,CF<sub>3</sub>,Ph -S, syn**

1\1\GINC-GAUSIANDELL\FOpt\UB3LYP\6-311G(d,p)\C29H22F3N7\PKASZYNSKI\16-Jan-2024\0\#\#P UB3LYP/6-311G(d,p) FOpt SCF=Direct Geom=(NoDistance,NoAngle) fcheck guess(mix,always) #P freq SCRF=(solvent=Benzene)\3-(3-NMe<sub>2</sub>-1-Ph-benzo[e][1,2,4]triazinyl-6-)-1-Ph-7-CF<sub>3</sub>-benzo[e][1,2,4]triazinyl, conformer syn\0,1\C, 0.1745566025, 0.9808507573, -0.0662184977\C, -0.2957429504, -0.3464795745, 0.0198388184\C, 1.5294025538, 1.2527993195, -0.0756932127\C, 0.6223736847, -1.3894767874, 0.0730037571\C, 2.458705652, 0.201050523, 0.0061438054\C, 2.0076587956, -1.1501043076, 0.0509841951\N, 2.8786835392, -2.1979887098, 0.056914927\N, 3.8319941237, 0.3775926958, 0.023123926\N, 4.7160778638, -0.6566403167, -0.0398885446\C, 4.1765086443, -1.894948375, -0.0407214901\C, 4.4590778718, 1.6661251159, 0.0729081681\C, 5.399307824, 2.0028265325, -0.9014709298\C, 4.1660601953, 2.5528527764, 1.1098694508\C, 6.0350745691, 3.2388837995, -0.8441271235\C, 4.8055696941, 3.7889987725, 1.1567506988\C, 5.7383293307, 4.1362113675, 0.181225999\C, -1.7480716746, -0.643085877, 0.0390823403\C, -3.4699595291, -2.1578238886, 0.1054153853\C, -4.4157996698, -1.1027337895, -0.0327307228\N, -2.1300232177, -1.9183112188, 0.1688700878\N, -2.5494344082, 0.4206811135, -0.0663638237\N, -3.8852654113, 0.1891907032, -0.0395512248\C, -4.6930764802, 1.3732076218, -0.0830406882\C, -4.456961166, 2.320724929, -1.0796953157\C, -5.6728790238, 1.5911372894, 0.8868154572\C, -5.2178645592, 3.4849743458, -1.1111402619\C, -6.43

18787829, 2.7575850149, 0.8429567492\C, -6.2087034289, 3.7045162369, -0.1549185011\C, -3.9511821612, -3.4814519768, 0.1480756482\C, -5.7761736376, -1.3815618549, -0.1858550826\C, -5.3004795092, -3.7534717656, 0.0294181932\C, -6.2113542716, -2.7028224157, -0.1494567373\H, 1.8719816228, 2.2751906546, -0.1522675432\H, 0.2797648345, -2.4134300818, 0.1215431535\H, 5.6249159763, 1.2936787851, -1.6870959581\H, 3.4578783547, 2.2708894426, 1.8790092435\H, 6.7620164904, 3.5019155153, -1.6038032519\H, 4.581754964, 4.4749137207, 1.965496631\H, 6.2357309181, 5.0981539102, 0.2231040096\H, -0.537825034, 1.7917317042, -0.1255199425\H, -3.6814365282, 2.1389193881, -1.8121736119\H, -5.8270847426, 0.8650127319, 1.6752570301\H, -5.0383954589, 4.219792097, -1.8871857258\H, -7.1897746714, 2.9293859539, 1.5981146171\H, -6.8003658469, 4.6118983376, -0.1840423886\H, -5.6553091769, -4.7757838868, 0.0555335077\H, -6.486790425, -0.5833299554, -0.3405061588\H, -3.2233002369, -4.2746920698, 0.2613543711\N, 5.0745575956, -2.926301665, -0.1517747156\C, 6.5077581972, -2.6865579059, -0.0686147712\H, 7.0268448513, -3.4706329035, -0.6244182951\H, 6.7540019445, -1.7203974938, -0.4996287616\H, 6.8661799952, -2.7039776272, 0.9701297595\C, 4.6434489821, -4.2992617433, 0.0672430853\H, 4.8107058519, -4.6140687049, 1.1068540899\H, 3.5846674151, -4.3884902366, -0.1552564335\H, 5.2134118086, -4.9623550625, -0.5886125974\C, -7.6777503537, -3.0027210563, -0.2451439611\F, -8.2524669661, -3.1210420803, 0.9797702621\F, -8.3624605848, -2.0354272338, -0.8956752103\F, -7.9189353099, -4.1658846807, -0.8908157142\\Version=ES64L-G09RevD.01\State=1-A\HF=-1801.5107022\S2=0.981945\S2-1=0.\S2A=0.1898\RMSD=9.135e-09\RMSF=3.824e-06\Dipole=1.1312734, 1.9207695, -0.0015241\Quadrupole=1.1231369, 8.3839102, -9.5070471, -10.0513113, -4.6265708, -0.6853731\PG=C01 [X(C29H22F3N7)]\@

**I[3,6]H,H,2-Pyr -T, anti**

1\1\GINC-GAUSIANDELL\FOpt\UB3LYP\6-311G(d,p)\C24H16N8(3)\PKASZYNSKI\17-Jan-2024\0\#\#P UB3LYP/6-311G(d,p) FOpt SCF=Direct Geom=(NoDistance,No Angle) fcheck freq #P SCRF=(solvent=Benzene)\3-(3-H-1-Ph-benzo[e][1,2,4]triazinyl-6-)-1-Ph-benzo[e][1,2,4]triazinyl, conformer anti\0,3\C, 1.2038345278, 1.2767320932, -0.074311114\C, 0.1974510091, 0.294268039, -0.0440234467\C, 2.5462204791, 0.9403246905, -0.0865526443\C, 0.5760227603, -1.0422543005, -0.0420426011\C, 2.9345554914, -0.4089638777, -0.0692017307\C, 1.9264334355, -1.419813935, -0.0682650506\N, 2.2323749939, -2.759366945, -0.1132803201\N, 4.2613946131, -0.864023656, -0.0936910968\N, 4.5541815209, -2.1962312453, -0.2062596128\C, 3.5255341447, -3.0306166004, -0.204185867\C, 5.429980874, -0.043634864, -0.0408428571\C, 6.6177106961, -0.5105052527, -0.6242489078\C, 7.7444611967, 0.2901315689, -0.5256415039\C, 6.4344498844, 1.8817131867, 0.6730668869\C, 7.6627593344, 1.5142601181, 0.138560617\C, -1.2317499688, 0.701907815, -0.0233037942\C, -2.8317874616, 2.3408617579, 0.0042115249\C, -3.8671306801, 1.3617096209, -0.0293100455\N, -1.5067954399, 2.0049623572, 0.0301870116\N, -2.1123718544, -0.2968218037, -0.0523508234\N, -3.4336043233, 0.0232401095, -0.0122213899\C, -4.2820558333, -1.1264884105, 0.0042292752\C, -3.8292044241, -2.3175376663, -0.5824107206\C, -4.656630618, -3.4271645219, -0.5141598377\C, -6.2464504427, -2.0925850529, 0.6604573695\C, -5.8932790976, -3.3240284501, 0.1232982113\C, -3.1850069137, 3.7046157596, -0.010834673\C, -5.2057535171, 1.769904274, -0.1182050263\C, -4.5082362521, 4.0946298831, -0.080957502\C, -5.5150330072, 3.1227578802, -0.143262223\H, 3.2938708123, 1.7143834126, -0.0800753691\H, -0.1613456583, -1.8321975661, -0.0269955172\H, 6.6366564719, -1.4670222899, -1.1224298715\H, 8.6782978006, -0.0374699671, -0.9675606496\H, 6.3171181558, 2.8242496197, 1.1991146659\H, 8.5227631201, 2.1643434471, 0.2373451563\H, 0.9102438477, 2.3174705377, -0.0836219639\H, -2.8646382325, -2.3533473452, -1.064379925\H, -4.3401190947, -4.363476932, -0.9587700469\H, -7.1988545958, -1.9592846299, 1.1645049546\H, -6.5641718785, -4.1702768112, 0.1990069301\H, -4.766196903

3, 5.1470784182, -0.0933267259\H, -5.9912559347, 1.034025831, -0.1363718617  
\H, -2.3770046624, 4.4247950242, 0.0235635415\H, -6.5544543052, 3.422337738  
9, -0.2076705422\H, 3.8150493029, -4.0748057464, -0.2798507486\N, -5.459960  
5132, -1.0122300013, 0.6095807984\N, 5.3376041395, 1.1212166877, 0.59255506  
69\\Version=ES64L-G09RevD.01\State=3-A\HF=-1362.4443209\S2=2.02996\S2-  
1=0.\S2A=2.000536\RMSD=8.582e-09\RMSF=5.200e-06\Dipole=-0.0109823, 0.07  
86922, -0.6749128\Quadrupole=28.6470937, -5.7280515, -22.9190422, 13.38065  
69, -1.9151679, 2.4975652\PG=C01 [X(C24H16N8)]\@

### I[3,6]H,H,2-Pyr -T, *syn*

1\1\GINC-GAUSIANDELL\FOpt\UB3LYP\6-311G(d,p)\C24H16N8(3)\PKASZYNSKI\17  
-Jan-2024\0\#\#P UB3LYP/6-311G(d,p) FOpt SCF=Direct Geom=(NoDistance,No  
Angle) fcheck freq #P SCRF=(solvent=Benzene)\3-(3-H-1-Ph-benzo[e][1,2  
,4]triazinyl-6-)-1-Ph-benzo[e][1,2,4]triazinyl, conformer *syn*\0,3\C  
, 0.8174069221, 0.5192453542, -0.0304534542\C, 0.145856557, -0.717992217, -0  
.0238761059\C, 2.1984863337, 0.593409395, -0.0618906011\C, 0.9009888106, -1  
.8820193824, -0.0666171089\C, 2.9672178625, -0.5817429352, -0.0919377686\C  
, 2.3028083889, -1.8437163053, -0.1172085507\N, 2.9897484688, -3.0308357267  
, -0.2158607598\N, 4.3691089704, -0.6224428179, -0.1424720728\N, 5.03919045  
54, -1.8029859587, -0.317021862\C, 4.3023836947, -2.9038109639, -0.33666420  
66\C, 5.2432891126, 0.5034531867, -0.0566137472\C, 6.50511889, 0.4355812022  
, -0.6669258766\C, 7.3472037267, 1.5280492819, -0.5337680516\C, 5.648016117  
9, 2.6052098279, 0.7463280672\C, 6.9202687841, 2.6418411989, 0.1899071596\C  
, -1.3386532293, -0.7933463834, 0.0205623223\C, -3.260306006, -2.0327960875  
, 0.1543129541\C, -4.0544338025, -0.8534045396, 0.0517541907\N, -1.89442713  
83, -1.996264786, 0.1618365401\N, -1.9764425402, 0.3715477955, -0.081380501  
9\N, -3.3368011783, 0.353293104, -0.0217409669\C, -3.9140492656, 1.65726013  
7, -0.0976884114\C, -3.2347511989, 2.6654423066, -0.797368166\C, -3.8011401  
934, 3.9301665012, -0.8215239248\C, -5.6016548794, 3.0806946584, 0.49228424  
56\C, -5.0094107521, 4.1542247762, -0.1610985701\C, -3.9054566788, -3.28334  
63963, 0.2295123668\C, -5.4511357444, -0.9604604445, -0.0142488059\C, -5.28  
24891824, -3.3748805086, 0.1794063604\C, -6.0508165582, -2.2104451824, 0.04  
87170405\H, 2.6859096724, 1.5524992176, -0.0310807675\H, 0.4195832304, -2.8  
496992048, -0.0759756493\H, 6.7961144687, -0.4491181489, -1.2111312644\H, 8  
.3279929611, 1.5114423578, -0.9946575226\H, 5.2677204967, 3.4460240776, 1.3  
185002602\H, 7.5521949485, 3.5115349798, 0.3175137695\H, 0.2386136973, 1.43  
2226567, 0.0025225103\H, -2.3028193362, 2.4464311989, -1.2953195996\H, -3.3  
06836832, 4.7327364445, -1.356511489\H, -6.5435223311, 3.2022247509, 1.0185  
980379\H, -5.4800784839, 5.1290924191, -0.1557785731\H, -5.7667650418, -4.3  
426346641, 0.2357810884\H, -6.0557707083, -0.0723611474, -0.08382608\H, -3.  
2753279838, -4.1598124372, 0.3155239863\H, -7.1313531383, -2.2770932486, 0.  
0003689996\H, 4.8849080519, -3.812174424, -0.4607196811\N, -5.0683977456, 1  
.8550066571, 0.5314294537\N, 4.8226923266, 1.5593715143, 0.6328997867\\Ver  
sion=ES64L-G09RevD.01\State=3-A\HF=-1362.4434409\S2=2.030052\S2-1=0.\S  
2A=2.000539\RMSD=8.969e-09\RMSF=5.159e-06\Dipole=-0.1975762, 2.4661864,  
-0.7334503\Quadrupole=21.785319, -1.6655061, -20.1198128, 5.4852533, -1.91  
08974, -1.2663472\PG=C01 [X(C24H16N8)]\@

### I[3,6]H,H,2-Pyr -S, *anti*

1\1\GINC-GAUSIANDELL\FOpt\UB3LYP\6-311G(d,p)\C24H16N8\PKASZYNSKI\18-Ja  
n-2024\0\#\#P UB3LYP/6-311G(d,p) FOpt SCF=Direct Geom=(NoDistance,NoAng  
le) fcheck guess(mix,always) #P freq SCRF=(solvent=Benzene)\3-(3-H-1-  
Pyr-benzo[e][1,2,4]triazinyl-6-)-1-Pyr-benzo[e][1,2,4]triazinyl, confo  
rmer *anti*\0,1\C, 1.202613353, 1.2818788104, -0.0779934233\C, 0.1969748119  
, 0.2994300634, -0.048747786\C, 2.5458348209, 0.9446768055, -0.091170845\C,  
0.5750631322, -1.0363516926, -0.0488574822\C, 2.93439926, -0.4035015179, -0  
.0762355329\C, 1.9269683624, -1.4142128371, -0.0767537958\N, 2.2290052408,



-2.7530124172,-0.1258223419\N,4.263845474,-0.861146289,-0.1017000551\N,4.5512862202,-2.1934034688,-0.2199949914\C,3.5229555677,-3.0263254994,-0.2199031517\C,5.4336075917,-0.0447963899,-0.0434215822\C,6.6276482021,-0.5204758007,-0.60793432\C,7.7550987618,0.2781588069,-0.5043061176\C,6.4357988329,1.8858097019,0.6615527062\C,7.6693835049,1.5096631646,0.1459344505\C,-1.2349764412,0.7039341703,-0.0259732968\C,-2.8357478807,2.3410005996,0.0050103907\C,-3.8703210144,1.3607717779,-0.028897717\N,-1.5105268528,2.005810713,0.0296826572\N,-2.1136547212,-0.2958111653,-0.0555333771\N,-3.4361388737,0.0234133886,-0.0128821805\C,-4.2832548523,-1.126997523,0.0055693429\C,-3.8291863363,-2.3186951278,-0.5789241921\C,-4.6555294229,-3.4290121568,-0.5088080901\C,-6.2466977402,-2.0940514301,0.6634996789\C,-5.8922929,-3.3260839313,0.1284535602\C,-3.18959095,3.7045996515,-0.0084138822\C,-5.2094590443,1.768648356,-0.1170057051\C,-4.5129482064,4.0938716002,-0.0775897056\C,-5.5191651148,3.1211736193,-0.1405855616\H,3.2935702219,1.7185663992,-0.083367363\H,-0.1619519131,-1.8266492125,-0.0347614353\H,6.6503453401,-1.4819307816,-1.0961945728\H,8.6930861375,-0.0567244229,-0.9318057383\H,6.3146569015,2.8343338047,1.1759305661\H,8.5299714031,2.1584698269,0.2478540561\H,0.909472635,2.3227188217,-0.0851593688\H,-2.8645835114,-2.3543494954,-1.0607795186\H,-4.3380302039,-4.3657642236,-0.9517856904\H,-7.1991918407,-1.9608610415,1.1674170963\H,-6.5622892352,-4.1729025803,0.2056646126\H,-4.7717079667,5.1461187939,-0.0888301751\H,-5.9946114768,1.0324445995,-0.1357400538\H,-2.3819000437,4.4250988792,0.0262851179\H,-6.5587611812,3.4202932756,-0.2044723857\H,3.8103746336,-4.070640279,-0.3002439476\N,-5.4613511974,-1.0130084494,0.6107704544\N,5.3377855116,1.1275941034,0.5760366923\\Version=ES64L-G09RevD.01\State=1-A\HF=-1362.4438771\S2=1.032217\S2-1=0.\S2A=0.265006\RMSD=7.132e-09\RMSF=5.961e-06\Dipole=-0.0689727,0.0495004,-0.6559861\Quadrupole=28.3175933,-5.4368074,-22.8807859,12.938528,-1.760259,2.4608703\PG=C01 [X(C24H16N8)]\@

**I[3,6]H,H,2-Pyr -S, syn**

1\1\GINC-GAUSIANDELL\FOpt\UB3LYP\6-311G(d,p)\C24H16N8\PKASZYNSKI\19-Jan-2024\0\#\#P UB3LYP/6-311G(d,p) FOpt SCF=Direct Geom=(NoDistance,NoAngle) fcheck guess(mix,always) #P freq SCRF=(solvent=Benzene)\3-(3-H-1-Pyr-benzo[e][1,2,4]triazinyl-6-)-1-Pyr-benzo[e][1,2,4]triazinyl, conformer syn\0,1\C,0.8120392122,0.5184319828,-0.0456424244\C,0.1435547899,-0.7195706655,-0.0201411399\C,2.1942699861,0.5942735753,-0.0737808063\C,0.8999474549,-1.8827192729,-0.0395785186\C,2.9653300104,-0.5783636329,-0.0807788449\C,2.3032270841,-1.8429642503,-0.085658948\N,2.9892424196,-3.0293541475,-0.1591404144\N,4.3693782031,-0.6193414813,-0.1255404377\N,5.0387510107,-1.803796503,-0.2725109456\C,4.3044986692,-2.9042678562,-0.274694304\C,5.243872985,0.507127006,-0.0616141427\C,6.5154605498,0.4191546572,-0.6497420701\C,7.3563955274,1.5148042839,-0.5391314356\C,5.6390475342,2.6344157622,0.6780402827\C,6.9197429293,2.6522604031,0.1408184569\C,-1.3405445207,-0.7999642638,0.0197304076\C,-3.2633971754,-2.0386902295,0.1317672741\C,-4.0555404534,-0.8576412747,0.0390240977\N,-1.8969330234,-2.0039031742,0.1453257016\N,-1.9766603208,0.3665793912,-0.0702096765\N,-3.3347186186,0.3496082799,-0.017888921\C,-3.9108547918,1.6554430375,-0.0809923315\C,-3.2327875774,2.6680237803,-0.7748850275\C,-3.7973844155,3.9338115099,-0.7860743599\C,-5.5940379261,3.0755111022,0.5277121359\C,-5.0026687537,4.1536781658,-0.1189104596\C,-3.9117910401,-3.2881548779,0.1894238067\C,-5.4517736579,-0.9598940093,-0.0352411924\C,-5.2891564595,-3.375846963,0.1317011072\C,-6.0550452233,-2.2090992228,0.0106088436\H,2.6798577634,1.5545379765,-0.0580460018\H,0.4198521207,-2.8510177374,-0.0330201164\H,6.814343729,-0.4825716197,-1.1605194908\H,8.3441986633,1.4823624569,-0.9839583189\H,5.2506138597,3.4937525686,1.2162673092\H,7.5504994359,3.5253699383,0.249416902\H,

0.2318011035,1.4308055294,-0.0300847792\H,-2.3031608265,2.451903241,-1  
.2785460829\H,-3.3041465271,4.7402810984,-1.3161206326\H,-6.5336027903  
,3.1939022219,1.0587844155\H,-5.4719294659,5.1291170521,-0.1034712687\  
H,-5.7753414707,-4.343377279,0.1747232853\H,-6.0539262298,-0.069504867  
7,-0.097947912\H,-3.2844874525,-4.167331271,0.2681196936\H,-7.13543197  
11,-2.2729794321,-0.0435790555\H,4.8873105051,-3.8149172734,-0.3778867  
532\N,-5.0623144254,1.8487909912,0.5542705746\N,4.8143825709,1.5859502  
937,0.5860015186\Version=ES64L-G09RevD.01\State=1-A\HF=-1362.4437285\  
S2=1.010773\S2-1=0.\S2A=0.255261\RMSD=7.281e-09\RMSF=6.737e-06\Dipole=  
-0.1980337,2.4708399,-0.7479297\Quadrupole=21.6966014,-1.4608664,-20.2  
35735,4.6683124,-1.9706513,-1.1983063\PG=C01 [X(C24H16N8)]\@

**I[3,6]H,H,4-Me2NPh -T, anti**

1\1\GINC-GAUSIANDELL\FOpt\UB3LYP/6-311G(d,p)\C30H28N8(3)\PKASZYNSKI\17  
-Jan-2024\0\#\#P UB3LYP/6-311G(d,p) FOpt SCF=Direct Geom=(NoDistance,No  
Angle) fcheck freq #P SCRF=(solvent=Benzene)\3-(3-H-1-Ph-benzo[e][1,2  
,4]triazinyl-6-)-1-Ph-benzo[e][1,2,4]triazinyl, conformer anti\0,3\  
C,1.1763423735,1.3010104865,-0.1910578057\C,0.1598102791,0.3295777378,  
-0.1461146907\C,2.5137699953,0.9425635182,-0.1905506542\C,0.5187897994  
, -1.0172239944,-0.1262886128\C,2.8761839154,-0.4123249256,-0.139530406  
4\C,1.8617313283,-1.4140966956,-0.1382491742\N,2.1786309673,-2.7541641  
166,-0.175770775\N,4.1924960825,-0.8580252428,-0.1146590021\N,4.508837  
0294,-2.1849951041,-0.2349313839\C,3.4753997729,-3.0187701413,-0.25788  
98122\C,5.321901376,0.0147241213,-0.019779116\C,6.351276197,-0.0784151  
897,-0.9565663087\C,5.4409044672,0.929526715,1.0267307845\C,7.46843895  
05,0.7360232953,-0.8646764479\C,6.5530436559,1.7527022977,1.1248287413  
\C,7.6064489104,1.6774658362,0.1834192755\C,-1.2634367227,0.754774473,  
-0.1386111173\C,-2.8414894444,2.42082909,-0.2098869323\C,-3.8780684489  
,1.4451667111,-0.2191058739\N,-1.5211124611,2.065763109,-0.1441565602\  
N,-2.1560642104,-0.2376889057,-0.1130128809\N,-3.4691673311,0.11716533  
66,-0.0952545469\C,-4.3800235958,-0.9836744716,-0.0098344464\C,-4.2713  
078499,-2.0453028203,-0.9081308735\C,-5.3473595577,-1.0426582737,0.993  
354109\C,-5.1180769806,-3.1381750881,-0.8189311085\C,-6.2036562838,-2.  
1300379499,1.0881387842\C,-6.1106910967,-3.2173526012,0.187353174\C,-3  
.1997448048,3.7786347549,-0.2990983394\C,-5.2149229318,1.835440763,-0.  
3721135567\C,-4.5263812031,4.1584168672,-0.4210216237\C,-5.531685735,3  
.1850212664,-0.4686285446\H,3.2769253235,1.7064833445,-0.2359632215\H,  
-0.2362889996,-1.7905999429,-0.1110060458\H,6.2723277744,-0.8016030229  
, -1.7583042332\H,4.6643121998,0.9950501723,1.779304221\H,8.2389659635,  
0.638397135,-1.616083535\H,6.605250761,2.4484250954,1.9500417204\H,0.8  
924524521,2.3437305234,-0.2291156561\H,-3.5103471558,-2.0125406103,-1.  
6776508608\H,-5.4265198288,-0.239829675,1.7166530558\H,-5.0035582973,-  
3.9360366704,-1.5387522556\H,-6.9377522199,-2.1373415433,1.8812279143\  
H,-4.7852726893,5.2084551814,-0.4911566134\H,-5.994992542,1.0886942884  
, -0.419907236\H,-2.3985149954,4.507394957,-0.2815660037\H,-6.567973064  
2,3.4793959608,-0.5859083143\H,3.7656222261,-4.0624203964,-0.343715297  
9\N,8.723869154,2.4780193197,0.2885777066\N,-6.9422792467,-4.310715240  
4,0.291636826\C,-6.9019270662,-5.3551247876,-0.7199502268\H,-7.6047511  
21,-6.1404507044,-0.4481088941\H,-7.1737089683,-4.9830576317,-1.717004  
1198\H,-5.9075918559,-5.8083941749,-0.7859061801\C,-8.0235644702,-4.31  
36212033,1.2640322082\H,-8.7557200646,-3.5157207322,1.0792900131\H,-8.  
5433034331,-5.2686865502,1.2147385149\H,-7.6432660116,-4.1956693344,2.  
2839908523\C,9.7152965414,2.4844028942,-0.7759350542\H,9.2996073738,2.  
8233347503,-1.7346763486\H,10.5265772552,3.1559923026,-0.5010341712\H,  
10.1455705602,1.4890450439,-0.9249415775\C,8.7760816529,3.5223143406,1  
.2997118917\H,9.7427528559,4.0199796493,1.2467092691\H,7.9920000969,4.

279816523,1.1630957852\H,8.6735934674,3.1054852997,2.3066294024\\Version=ES64L-G09RevD.01\State=3-A\HF=-1598.3614653\S2=2.02724\S2-1=0.\S2A=2.000431\RMSD=6.088e-09\RMSF=1.893e-06\Dipole=-0.631541,0.6392554,0.1246918\Quadrupole=48.5423343,-14.9765823,-33.5657521,43.9739111,-3.7787248,4.1569793\PG=C01 [X(C30H28N8)]\@

**I I[3,6]H,H,4-Me2NPh -T, syn**

1\1\GINC-GAUSIANDELL\FOpt\UB3LYP\6-311G(d,p)\C30H28N8(3)\PKASZYNSKI\17-Jan-2024\0\#P UB3LYP/6-311G(d,p) FOpt SCF=Direct Geom=(NoDistance,No Angle) fcheck freq #P SCRF=(solvent=Benzene)\3-(3-H-1-Ph-benzo[e][1,2,4]triazinyl-6-)-1-Ph-benzo[e][1,2,4]triazinyl, conformer syn\0,3\C,0.8616978853,0.351004468,-0.0459857302\C,0.1745326305,-0.8758346379,0.0243767486\C,2.244450405,0.4015604022,-0.0117116702\C,0.9129868309,-2.0538685465,0.1038369704\C,2.9880581328,-0.7841073994,0.1013888628\C,2.3135968793,-2.0383444458,0.1293360578\N,3.0101284106,-3.2272301493,0.1520009861\N,4.3769476319,-0.8204211939,0.1639892445\N,5.0712339262,-1.9996973802,0.1026259504\C,4.3288062572,-3.1010325413,0.0991507133\C,5.1989648645,0.3473374563,0.2377895231\C,6.2505995151,0.5118365926,-0.6639419644\C,5.0159887149,1.2991117563,1.2414470752\C,7.0867927642,1.6137314544,-0.5845098253\C,5.8445825631,2.4086163985,1.3254193183\C,6.8997513738,2.6083582799,0.4046686459\C,-1.3109384772,-0.927238149,-0.0000954842\C,-3.2551254961,-2.1478484445,0.0153914743\C,-4.0128854655,-0.9528308347,-0.1398733483\N,-1.8902610836,-2.1247325028,0.1100298817\N,-1.9248293066,0.2534711669,-0.1183081423\N,-3.2869844059,0.2369766777,-0.1306364741\C,-3.8985126511,1.5295436656,-0.1956011747\C,-3.5429039518,2.4190029513,-1.2092277758\C,-4.8205373799,1.9357262682,0.7688657111\C,-4.1041675826,3.6847917293,-1.269424742\C,-5.3921007374,3.1985935805,0.7147606162\C,-5.044532264,4.1171627461,-0.3037808765\C,-3.9398380909,-3.3769420105,0.0446472218\C,-5.4019535892,-1.0142152603,-0.3149674515\C,-5.3161710097,-3.4273781954,-0.101617944\C,-6.0440699965,-2.2460489836,-0.2919718423\H,2.7503903574,1.354431218,-0.077128436\H,0.4108351816,-3.0105710152,0.1362373663\H,6.4192766752,-0.2420937961,-1.4221481794\H,4.2334722719,1.1651717165,1.9786394727\H,7.8917250828,1.6982810186,-1.3005363423\H,5.6755186606,3.113585232,2.126837096\H,0.2926706501,1.2668859316,-0.1288788798\H,-2.8191309834,2.1119549436,-1.953837576\H,-5.0895676345,1.2640749025,1.5754542553\H,-3.8102634829,4.3405660944,-2.0763783853\H,-6.1027149901,3.4743468633,1.4805671292\H,-5.8289446079,-4.3818398644,-0.0798620993\H,-5.9687051254,-0.1072087975,-0.4718915716\H,-3.3471532958,-4.2744932024,0.1724666455\H,-7.1185368689,-2.286357058,-0.4271738256\H,4.9149491305,-4.0152341542,0.0602155803\N,-5.5904236688,5.3826610127,-0.3476923776\N,7.7102013273,3.7240091304,0.4669334483\C,-5.3304873377,6.246348886,-1.4892475136\H,-5.7153898685,5.82853106,-2.4297651007\H,-5.8111344054,7.2086764372,-1.322493033\H,-4.2585767203,6.429264001,-1.6121078184\C,-6.6592688268,5.7433899183,0.5708181273\H,-6.9346594677,6.783255033,0.4043343248\H,-7.5572318616,5.1247015688,0.4357435212\H,-6.3359568123,5.6500668273,1.6122155903\C,7.6114377061,4.6264990467,1.6038198312\H,8.2929027363,5.4620543344,1.4529562406\H,6.6014848587,5.0370876971,1.6946110815\H,7.8690822335,4.1397220893,2.5549331487\C,8.8965588587,3.8020992321,-0.371892376\H,9.3807000416,4.7639798254,-0.2120034428\H,9.6246200737,3.0091895907,-0.1503891811\H,8.6352844146,3.7372849784,-1.4322163562\\Version=ES64L-G09RevD.01\State=3-A\HF=-1598.3607813\S2=2.027362\S2-1=0.\S2A=2.000433\RMSD=4.669e-09\RMSF=4.395e-06\Dipole=-0.8743767,4.5141832,-0.10696\Quadrupole=34.2128195,-10.4947338,-23.7180856,7.6687456,-0.2760324,1.1870938\PG=C01 [X(C30H28N8)]\@

**I I[3,6]H,H,4-Me2NPh -S, anti**

1\1\GINC-GAUSIANDELL\FOpt\UB3LYP\6-311G(d,p)\C30H28N8\PKASZYNSKI\18-Jan-2024\0\#\#P UB3LYP/6-311G(d,p) FOpt SCF=Direct Geom=(NoDistance,NoAngle) fcheck guess(mix,always) #P freq SCRF=(solvent=Benzene)\3-(3-H-1-PhNme2-benzo[e][1,2,4]triazinyl-6)-1-PhNme2-benzo[e][1,2,4]triazinyl, conformer anti\0,1\C,1.1741708362,1.3068619754,-0.1951598801\C,0.1582260693,0.3356951268,-0.1494132367\C,2.5122145669,0.9471025847,-0.1954516481\C,0.516307012,-1.0103634886,-0.1297502528\C,2.8740109822,-0.4067712961,-0.1443507182\C,1.8604625622,-1.4080057905,-0.1429184703\N,2.1739477058,-2.7478735423,-0.1830843508\N,4.1927024412,-0.8549368015,-0.1200098494\N,4.5046491754,-2.1816536376,-0.2472703868\C,3.4712122539,-3.0141552445,-0.2703630483\C,5.3229470224,0.0153569387,-0.0230897166\C,6.3569606512,-0.0829502707,-0.9544699137\C,5.4390804524,0.9341623022,1.0204924541\C,7.4755317518,0.7292933713,-0.8599093378\C,6.5523895091,1.7554681278,1.1208581648\C,7.6103942915,1.6744334879,0.1851626463\C,-1.2682300428,0.7591417744,-0.1400375759\C,-2.8471761422,2.4231261369,-0.2067444379\C,-3.8828944281,1.4463402132,-0.2188492926\N,-1.5265468435,2.0688018148,-0.1411133199\N,-2.1586396163,-0.2344542732,-0.1172212819\N,-3.4727928165,0.1190703247,-0.0970131537\C,-4.3818313387,-0.9828660823,-0.0105355944\C,-4.2687991022,-2.0472110539,-0.9052073757\C,-5.3516308735,-1.0405838838,0.9904687374\C,-5.1140249048,-3.1411200975,-0.814967612\C,-6.2061277666,-2.1292067903,1.0864075963\C,-6.1091708717,-3.2189589857,0.1889648238\C,-3.206716198,3.7807245313,-0.2929697682\C,-5.2202062136,1.8357583343,-0.3727051938\C,-4.5335996184,4.1593834166,-0.415288433\C,-5.5380259701,3.1850584221,-0.4664231623\H,3.2754843375,1.7109423674,-0.2411917147\H,-0.2387246546,-1.7838142807,-0.1139815513\H,6.2804229343,-0.8087556819,-1.7540542485\H,4.6592317493,1.0041214695,1.7692529917\H,8.2494949425,0.6272093944,-1.6071924879\H,6.6019008028,2.4542503168,1.9436582486\H,0.8908747174,2.3497326362,-0.2327008896\H,-3.5058619869,-2.0154542421,-1.672773304\H,-5.4339030033,-0.235923259,1.7113475467\H,-4.9963401397,-3.9409118352,-1.5321297272\H,-6.9420245132,-2.1355629995,1.8778283902\H,-4.793511141,5.2093133143,-0.483199399\H,-5.999454627,1.088357244,-0.4233977523\H,-2.4062616349,4.5102590501,-0.273026494\H,-6.574412412,3.4787967448,-0.584393086\H,3.7595477513,-4.0578165947,-0.3611865221\N,8.7291420208,2.4731006528,0.2929270796\N,-6.9393173321,-4.3132255366,0.294232368\C,-6.8946675662,-5.3606219505,-0.7141144166\H,-7.5970812882,-6.1461577275,-0.4418436602\H,-7.1643099198,-4.9918718126,-1.7129633947\H,-5.8995052599,-5.8126344946,-0.7760194505\C,-8.0228607144,-4.3151823984,1.264155254\H,-8.7556055128,-3.5187123597,1.0756997229\H,-8.5412315418,-5.2710416233,1.2160033828\H,-7.6450800082,-4.1941997863,2.2846950457\C,9.7251414639,2.4742134912,-0.7672695408\H,9.3144031775,2.8109552158,-1.7289457574\H,10.5365997522,3.1450134533,-0.4909291231\H,10.1540701404,1.4775421258,-0.9112949056\C,8.7780571977,3.5215635494,1.2998434853\H,9.7460592633,4.0169992942,1.2500072347\H,7.9962984559,4.2801565365,1.1559102481\H,8.6693200828,3.1091975015,2.3079368254\Version=ES64L-G09RevD.01\State=1-A\HF=-1598.3607868\S2=1.027361\S2-1=0.\S2A=0.2206\RMSD=7.162e-09\RMSF=5.065e-06\ dipole=-0.6810968,0.604258,0.1291332\Quadrupole=48.4205272,-14.8149849,-33.6055423,43.7829854,-3.7675184,4.1546959\PG=C01 [X(C30H28N8)]\@

**I[3,6]H,H,4-Me2NPh -S, syn**

1\1\GINC-GAUSIANDELL\FOpt\UB3LYP\6-311G(d,p)\C30H28N8\PKASZYNSKI\18-Jan-2024\0\#\#P UB3LYP/6-311G(d,p) FOpt SCF=Direct Geom=(NoDistance,NoAngle) fcheck guess(mix,always) #P freq SCRF=(solvent=Benzene)\3-(3-H-1-Ph-benzo[e][1,2,4]triazinyl-6)-1-Ph-benzo[e][1,2,4]triazinyl, conformer syn\0,1\C,0.8544817564,0.3477223559,-0.0421144089\C,0.1710760876,-0.8805758536,0.0269685761\C,2.2383564014,0.4004341333,-0.0086671243\C,0.910184393,-2.0575533496,0.1059890963\C,2.9837885967,-0.7828259228,

0.102742407\C, 2.3120943985, -2.0398178695, 0.1303207039\N, 3.0085630968, -3.2254644358, 0.1510886329\N, 4.3738317123, -0.8182690254, 0.1651656784\N, 5.0683100614, -1.9968146458, 0.1022004314\C, 4.3290926231, -3.0981939484, 0.0975884071\C, 5.1947308973, 0.3501952442, 0.2379320626\C, 6.245782924, 0.5156431506, -0.6643110121\C, 5.0109807223, 1.302345007, 1.241143034\C, 7.0809742699, 1.618396875, -0.5854801007\C, 5.8384336464, 2.4127094668, 1.3244313836\C, 6.893185477, 2.6131925764, 0.40333694\C, -1.3135918529, -0.9380864858, 0.0024872756\C, -3.2587550431, -2.155319407, 0.0142055202\C, -4.0144689614, -0.9591312541, -0.1384654918\N, -1.8934331013, -2.1354914713, 0.1091274805\N, -1.9255296544, 0.2431254486, -0.1125364335\N, -3.2837536334, 0.2309181324, -0.127414847\C, -3.892862492, 1.525021181, -0.1930968016\C, -3.5343481868, 2.413262421, -1.2066893009\C, -4.8149756172, 1.9330399176, 0.7704616379\C, -4.0926771897, 3.6802771034, -1.2675782706\C, -5.3832956065, 3.1972834262, 0.7157869052\C, -5.0326865027, 4.114988434, -0.3026035048\C, -3.9477479852, -3.3818533595, 0.0402771265\C, -5.4028493919, -1.0147256517, -0.3143221795\C, -5.3246592172, -3.4274295498, -0.1065784538\C, -6.0498385211, -2.2446185766, -0.2944419401\H, 2.7423310384, 1.3544407326, -0.0727339372\H, 0.4088756831, -3.0146640122, 0.13858618\H, 6.415014692, -0.2382271441, -1.4224728134\H, 4.2286144676, 1.1680791444, 1.978426495\H, 7.8856234804, 1.7034892571, -1.3017664643\H, 5.6687337853, 3.1179138015, 2.1255140518\H, 0.2836340384, 1.2624914927, -0.1228754657\H, -2.8109936895, 2.1043064803, -1.9509363081\H, -5.0864304875, 1.2620114617, 1.5767261336\H, -3.7968755342, 4.3350767507, -2.0746091352\H, -6.0940196029, 3.4747304756, 1.4808600988\H, -5.8397264038, -4.3807922588, -0.0870332363\H, -5.9661940863, -0.1052870556, -0.4695697356\H, -3.3584834313, -4.2819511094, 0.1660244093\H, -7.1243319075, -2.2814005078, -0.4298975866\H, 4.9153855167, -4.01205575, 0.0569203698\N, -5.5755728117, 5.3815848546, -0.3471358896\N, 7.7023673382, 3.7298195955, 0.4649128898\C, -5.3121809868, 6.2448745473, -1.4882658268\H, -5.696939596, 5.8280267306, -2.4292301116\H, -5.7908058113, 7.2082766035, -1.3219659673\H, -4.2397004387, 6.425303789, -1.6097348331\C, -6.6441053222, 5.7452482471, 0.5706873652\H, -6.916545634, 6.785826942, 0.4039186803\H, -7.5435631001, 5.1289604092, 0.4349194761\H, -6.3217078593, 5.6510872556, 1.6122727692\C, 7.6033406873, 4.6322686548, 1.6018142749\H, 8.2841707162, 5.4682981432, 1.4507236597\H, 6.5931419736, 5.0421740613, 1.6929602864\H, 7.8616459339, 4.1456722922, 2.5528311779\C, 8.8882092202, 3.8090811403, -0.3745392144\H, 9.371060822, 4.7717371648, -0.215446478\H, 9.6174763316, 3.0173080075, -0.1529574599\H, 8.6264284706, 3.7432813564, -1.4346703638\\Version=ES64L-G09R evD.01\State=1-A\HF=-1598.3612001\S2=0.993946\S2-1=0.\S2A=0.206646\RMS D=8.313e-09\RMSF=4.065e-06\Dipole=-0.8416555, 4.5497667, -0.1083241\Quad rupole=34.0582833, -10.4154488, -23.6428345, 6.9879687, -0.2884925, 1.1712735\PG=C01 [X(C30H28N8)]\@

**I[3,7]H,H,Ph -T, anti**

1\1\GINC-LOCALHOST\FOpt\UB3LYP\6-311G(d,p)\C26H18N6(3)\PIOTR\10-Jan-2024\0\#\#P UB3LYP/6-311G(d,p) FOpt SCF=Direct Geom=(NoDistance,NoAngle) fcheck freq #P SCRF=(solvent=Benzene)\3-(3-H-1-Ph-benzo[e][1,2,4]triazinyl-7-)-1-Ph-benzo[e][1,2,4]triazinyl, conformer anti\0,3\C, -1.6608206894, 0.0216492238, -0.026875033\C, -2.9916743303, 1.8885721357, -0.1724527051\C, -4.1554064498, 1.0758207003, -0.0659313014\C, -0.3100352416, -0.5908734465, 0.040516259\C, -0.1468829215, -1.9871832002, 0.1405567404\C, 0.8171386643, 0.2324228486, -0.0040526627\C, 1.1149253864, -2.5427082767, 0.168825743\C, 2.0963992165, -0.3213940292, 0.0617579288\C, 2.2683452824, -1.7357281869, 0.1123822859\N, 3.5055802689, -2.3169069807, 0.0732183321\N, 3.2723022951, 0.4393011967, 0.0504756106\N, 4.50039751, -0.1421376907, -0.0909831952\C, 4.5196555571, -1.4649981195, -0.0690827321\C, 3.3011803871, 1.8670638544, 0.123641798\C, 4.078684635, 2.5784014606, -0.7928516767\C, 2.6045290085, 2.5411232454, 1.1293550234\C, 4.1422496623, 3.9652274582, -0.71039626

72\C, 2.6717735345, 3.9296780631, 1.1996548132\C, 3.4362834, 4.646139114, 0.2806838696\N, -3.9341263636, -0.3006699471, -0.0236576856\N, -2.6841428625, -0.8331040721, 0.0575020952\N, -1.7356294777, 1.346662145, -0.176287613\C, -5.4236328779, 1.6653270093, 0.0197786591\C, -3.1526180288, 3.2847167396, -0.2491260282\C, -4.4113070496, 3.8580166398, -0.1939378571\C, -5.544433436, 3.0472642026, -0.0480052097\C, -4.9885653145, -1.2704703758, -0.0007480349\C, -5.0145838631, -2.2237602163, 1.0180590033\C, -5.9508753364, -1.288218913, -1.0116369885\C, -6.0177815006, -3.1876091259, 1.0304081943\C, -6.9532440925, -2.2544114015, -0.9875847996\C, -6.9912398193, -3.2036481911, 0.0322170332\H, -1.0254479641, -2.6165810201, 0.1762823142\H, 0.6717297561, 1.2980828281, -0.0932830104\H, 1.2611830394, -3.6147245157, 0.2164073587\H, 4.6301421441, 2.0373282059, -1.5500509172\H, 2.029837268, 1.9844649421, 1.8584379601\H, 4.7432540179, 4.5149183087, -1.4255213567\H, 2.1333210927, 4.4491063165, 1.9837478683\H, 3.4872619453, 5.726982009, 0.3406593645\H, -4.5201030489, 4.9345456788, -0.251898127\H, -2.2561591905, 3.8856241001, -0.340311739\H, -6.3034920973, 1.0496645853, 0.1433084276\H, -4.2488241854, -2.2043070667, 1.7825025253\H, -5.904095783, -0.5651776374, -1.8164062353\H, -6.0395811432, -3.9259298452, 1.8234997715\H, -7.6966631494, -2.271348002, -1.775993531\H, -7.7710434765, -3.956042581, 0.0451888616\H, -6.5282714481, 3.4965133156, 0.0174796603\H, 5.5145921297, -1.8882816161, -0.1703876396\Ver  
sion=ES64L-G09RevD.01\State=3-A\HF=-1330.3544679\S2=2.032336\S2-1=0.\S  
2A=2.000596\RMSD=5.768e-09\RMSF=8.257e-06\Dipole=-2.3604791, 0.9758774,  
0.0689085\Quadrupole=5.0344836, 2.8864202, -7.9209038, 13.9626166, -1.0274  
444, -1.6167709\PG=C01 [X(C26H18N6)]\@

**I[3,7]H,H,Ph -T, syn**

1\1\GINC-LOCALHOST\FOpt\UB3LYP\6-311G(d,p)\C26H18N6(3)\PIOTR\10-Jan-20  
24\0\#\#P UB3LYP/6-311G(d,p) FOpt SCF=Direct Geom=(NoDistance,NoAngle)  
fcheck freq #P SCRF=(solvent=Benzene)\3-(3-H-1-Ph-benzo[e][1,2,4]tria  
ziny1-7)-1-Ph-benzo[e][1,2, 4]triazinyl, conformer syn\0,3\C,1.65615  
19242, -1.4854044193, -0.0747685705\C, 3.7146563134, -2.5037519056, -0.0457  
158019\C, 4.3478958568, -1.2375217944, 0.0986336124\C, 0.1763036424, -1.583  
0966818, -0.1196568742\C, -0.4361750628, -2.8475516837, -0.2157903621\C, -0  
.6186908868, -0.4346027578, -0.0637467579\C, -1.8109224556, -2.960054561, -  
0.2289127573\C, -2.0091098017, -0.5391126576, -0.1126889168\C, -2.63554541  
68, -1.8206876158, -0.1601929252\N, -3.9938115421, -1.9640202041, -0.109895  
3103\N, -2.8716995032, 0.56336044, -0.0894085197\N, -4.2215677884, 0.415699  
5425, 0.0596432952\C, -4.6729939774, -0.8276882992, 0.0380366352\C, -2.4338  
900204, 1.9230746268, -0.1592650303\C, -2.9332472709, 2.8446853846, 0.76365  
97597\C, -1.5604684462, 2.3381771511, -1.1672308475\C, -2.542445114, 4.1771  
188907, 0.6853024731\C, -1.1717739232, 3.6731510231, -1.2328495226\C, -1.65  
73950534, 4.5953903512, -0.307789999\N, 3.5026982674, -0.1266626691, 0.0589  
391125\N, 2.1485378344, -0.2473843301, 0.032649614\N, 2.3558421293, -2.6196  
101178, -0.1576491228\C, 5.73217612, -1.1581961659, 0.2979671254\C, 4.51775  
76411, -3.6595247549, -0.0439285444\C, 5.8891905072, -3.5708836671, 0.12225  
42827\C, 6.4931490132, -2.3203485476, 0.3045230523\C, 3.9720017653, 1.22605  
56371, 0.1080413513\C, 3.4511769208, 2.0928771167, 1.0698822307\C, 4.905633  
9163, 1.6820971261, -0.8243139109\C, 3.8807503169, 3.4156603155, 1.10595134  
15\C, 5.3326838486, 3.0065391101, -0.7762682051\C, 4.8248445444, 3.87499495  
3, 0.1882832757\H, 0.1946919219, -3.7242249247, -0.2656013903\H, -0.1385046  
667, 0.5282840035, 0.0167910813\H, -2.3004838272, -3.9249093405, -0.2768226  
426\H, -3.6284100884, 2.5091298419, 1.5215144319\H, -1.201799818, 1.6285555  
197, -1.9017072578\H, -2.9295206558, 4.88948508, 1.4046844318\H, -0.4960688  
443, 3.9920728116, -2.0177542068\H, -1.3542481291, 5.6342719301, -0.3648282  
857\H, 6.4944375952, -4.4696401474, 0.1237789827\H, 4.0189467708, -4.613351  
6997, -0.1640360485\H, 6.2066928968, -0.1994148621, 0.4523048033\H, 2.71440  
76276, 1.7252360758, 1.7719662269\H, 5.2799427751, 1.0118488414, -1.5879496

615\H, 3.478367095, 4.0873381381, 1.8552514489\H, 6.0540792615, 3.361103686  
5, -1.5031820006\H, 5.1579936927, 4.9057058787, 0.2206251894\H, 7.563562175  
6, -2.2515630049, 0.4576190459\H, -5.7510185915, -0.9024508238, 0.145275598  
5\\Version=ES64L-G09RevD.01\State=3-A\HF=-1330.3546883\S2=2.032652\S2-  
1=0.\S2A=2.000607\RMSD=6.233e-09\RMSF=5.856e-06\Dipole=2.3764892, 1.769  
5337, 0.1098247\Quadrupole=-1.0572453, 6.0403894, -4.983144, -4.4035415, -4  
.4876705, 1.2861475\PG=C01 [X(C26H18N6)]\@

**I[3,7]H,H,Ph -S, anti**

1\1\GINC-LOCALHOST\FOpt\UB3LYP\6-311G(d,p)\C26H18N6\PIOTR\10-Jan-2024\  
0\#\#P UB3LYP/6-311G(d,p) FOpt SCF=Direct Geom=(NoDistance,NoAngle) fch  
eck guess(mix,always) #P freq SCRF=(solvent=Benzene)\3-(3-tBu-1-Ph-be  
nzo[e][1,2,4]triazinyl-7-)-1-Ph-benzo[e][1,2,4]triazinyl, conformer a  
nti\0,1\C, -1.6597672716, 0.0319339345, -0.0310486955\C, -2.9922524611, 1.  
896347504, -0.1724325361\C, -4.1545309677, 1.0821917521, -0.0656024531\C, -  
0.3115881146, -0.5881282368, 0.0374569956\C, -0.1528593638, -1.984096591, 0  
.1339649329\C, 0.8157515639, 0.2336221628, -0.0033659143\C, 1.1091832464, -  
2.5423753552, 0.1637756499\C, 2.0951047421, -0.3234748497, 0.063225852\C, 2  
.2629849459, -1.7385088891, 0.1123326583\N, 3.5022997619, -2.3208608917, 0.  
0778578439\N, 3.2697007462, 0.4346077401, 0.0542108697\N, 4.499256629, -0.1  
463201041, -0.0787340561\C, 4.5162000845, -1.470835761, -0.0570967891\C, 3.  
2990792073, 1.8632419568, 0.1248027987\C, 4.0727809523, 2.5720423658, -0.79  
65274672\C, 2.6070121718, 2.5386636755, 1.1323942829\C, 4.1366704521, 3.959  
0479172, -0.7172089691\C, 2.6747238566, 3.9273732359, 1.1997409189\C, 3.435  
1863745, 4.6417364509, 0.2758383432\N, -3.9286608644, -0.2965365853, -0.025  
4407764\N, -2.6810348743, -0.8236244112, 0.0499715261\N, -1.7347052136, 1.3  
568020046, -0.1776238327\C, -5.4243752363, 1.6657400096, 0.0234206335\C, -3  
.1588490956, 3.2916197807, -0.2475070881\C, -4.4200866546, 3.8604848649, -0  
.1895545013\C, -5.5509801307, 3.0477075151, -0.0425127204\C, -4.9818020989  
, -1.268657929, -0.0023053029\C, -5.0059758537, -2.2211144179, 1.01711488\C  
, -5.9434716483, -1.2882806494, -1.0136175565\C, -6.0070753616, -3.18718019  
27, 1.0293914283\C, -6.9433913128, -2.2569731309, -0.9897809526\C, -6.97970  
20338, -3.2058255882, 0.0304806801\H, -1.0326089719, -2.6118029023, 0.16626  
8174\H, 0.6716296261, 1.2995778441, -0.0914459105\H, 1.2528441962, -3.61481  
45971, 0.209754643\H, 4.6208701596, 2.0292542893, -1.5549609453\H, 2.035291  
1581, 1.9832399828, 1.8647678703\H, 4.7344436475, 4.5073890144, -1.43603522  
11\H, 2.1397518141, 4.4484864862, 1.9850614615\H, 3.4865038157, 5.722690780  
5, 0.3334532583\H, -4.5315963183, 4.9368919544, -0.2464199992\H, -2.2651601  
876, 3.8965183579, -0.3395275573\H, -6.3015302354, 1.0462775159, 0.14765461  
61\H, -4.2408992974, -2.1993413411, 1.7822237151\H, -5.8980655388, -0.56503  
93195, -1.8182532309\H, -6.02782287, -3.9250613354, 1.8228912339\H, -7.6864  
14344, -2.2759501471, -1.778490981\H, -7.7578488532, -3.9599254807, 0.04334  
39289\H, -6.5360183895, 3.4938274912, 0.0249277327\H, 5.5118894716, -1.8941  
860111, -0.151747751\\Version=ES64L-G09RevD.01\State=1-A\HF=-1330.35444  
45\S2=0.992568\S2-1=0.\S2A=0.191907\RMSD=9.777e-09\RMSF=9.559e-06\Dipo  
le=-2.3470247, 0.9455662, 0.0726091\Quadrupole=5.238664, 2.7247542, -7.963  
4183, 14.6672879, -1.061518, -1.5865629\PG=C01 [X(C26H18N6)]\@

**I[3,7]H,H,Ph -S, syn**

1\1\GINC-LOCALHOST\FOpt\UB3LYP\6-311G(d,p)\C26H18N6\PIOTR\10-Jan-2024\  
0\#\#P UB3LYP/6-311G(d,p) FOpt SCF=Direct Geom=(NoDistance,NoAngle) fch  
eck guess(mix,always) #P freq SCRF=(solvent=Benzene)\3-(3-H-1-Ph-benz  
o[e][1,2,4]triazinyl-7-)-1-Ph-benzo[e][1,2,4]triazinyl, conformer syn  
\0,1\C, 1.6575185205, -1.4875736701, -0.0742395622\C, 3.7157574848, -2.503  
3315778, -0.0520356146\C, 4.3479112313, -1.2368882061, 0.0971236239\C, 0.17  
35108826, -1.5863707887, -0.1169545982\C, -0.4393200375, -2.8496693161, -0.  
2094641842\C, -0.6188711713, -0.4377595915, -0.0627941398\C, -1.81547954, -

2.9600360711,-0.2206628352\C,-2.0110061791,-0.5410369429,-0.1105223413  
\C,-2.6373689324,-1.8205164208,-0.1548743464\N,-3.9999204802,-1.961421  
472,-0.1030861763\N,-2.8700976371,0.5638198381,-0.0868093679\N,-4.2199  
54911,0.4197838891,0.0656430507\C,-4.6738932779,-0.8253330505,0.045359  
5001\C,-2.4293676055,1.9221977877,-0.1618739104\C,-2.9266293279,2.8480  
90126,0.7579952519\C,-1.5558265155,2.332072828,-1.171956967\C,-2.53302  
04029,4.1793428337,0.674849121\C,-1.1644612636,3.6660378478,-1.2423670  
163\C,-1.6476172787,4.5923925468,-0.3201749786\N,3.5011594201,-0.12736  
83408,0.0620085133\N,2.1472180253,-0.2502760228,0.0371748241\N,2.35685  
52794,-2.6196926942,-0.1632724145\C,5.7323663518,-1.1561758626,0.29631  
61373\C,4.5206858783,-3.657688006,-0.0559820109\C,5.892124419,-3.56751  
33608,0.1097499796\C,6.4948807811,-2.3170655494,0.2973838244\C,3.96833  
4091,1.2259857898,0.1136648852\C,3.4448989783,2.0904047738,1.076266334  
\C,4.9021785175,1.6848321758,-0.8171212875\C,3.8723998587,3.4137603053  
,1.1148383286\C,5.3268291384,3.0099271008,-0.7666763114\C,4.8166181573  
,3.8760225811,0.1987575078\H,0.1902005305,-3.7273549137,-0.2579702987\  
H,-0.1379121074,0.5248675905,0.0165596343\H,-2.3059609051,-3.924624922  
8,-0.2652767473\H,-3.622152743,2.5164790918,1.5172179979\H,-1.19966737  
01,1.6193849296,-1.9046695834\H,-2.9182515793,4.8949961023,1.391949096  
\H,-0.4887686104,3.9809345288,-2.0288993248\H,-1.3424676371,5.63046903  
21,-0.381015604\H,6.4985965372,-4.4654616033,0.1068966786\H,4.02347248  
51,-4.6118480214,-0.1799293749\H,6.2053404873,-0.1973043889,0.45479918  
3\H,2.7080278561,1.7204468636,1.7770039758\H,5.2782886704,1.0163919087  
, -1.5814304905\H,3.4682449213,4.0836252276,1.8647943067\H,6.0482633955  
,3.3668373611,-1.492388779\H,5.148030938,4.907226588,0.2330021619\H,7.  
5652616122,-2.2477328325,0.4503142854\H,-5.7521774461,-0.8960301813,0.  
1544049938\\Version=ES64L-G09RevD.01\State=1-A\HF=-1330.3536144\S2=1.0  
25333\S2-1=0.\S2A=0.208133\RMSD=9.797e-09\RMSF=1.435e-05\Dipole=2.4139  
126,1.8082518,0.1103612\Quadrupole=-1.1879511,6.0549917,-4.8670406,-4.  
4853437,-4.4726779,1.2766807\PG=C01 [X(C26H18N6)]\@

**I[3,7]CF<sub>3</sub>,H,Ph -T, anti**

1\1\GINC-LOCALHOST\FOpt\UB3LYP\6-311G(d,p)\C27H17F3N6(3)\PIOTR\11-Jan-  
2024\0\#P UB3LYP/6-311G(d,p) FOpt SCF=Direct Geom=(NoDistance,NoAngle  
) fcheck freq #P SCRF=(solvent=Benzene)\3-(3-CF3-1-Ph-benzo[e][1,2,4]  
triazinyl-7)-1-Ph-benzo[e][1,2,4]triazinyl, conformer anti\0,3\C,-1.  
660948325,0.0212066977,0.0047550578\C,-2.9904228001,1.8907221542,-0.09  
06496229\C,-4.1535918439,1.0739847651,-0.0131795456\C,-0.3094599177,-0  
.5916106419,0.0677829434\C,-0.1458616399,-1.9872508386,0.1763915615\C,  
0.816682171,0.2327496131,0.0145847985\C,1.1155380014,-2.5435008878,0.2  
092898355\C,2.0943016501,-0.3207849432,0.0797672111\C,2.2659012518,-1.  
7344639618,0.1456169155\N,3.5037814314,-2.3114248055,0.113208603\N,3.2  
717468574,0.4420768114,0.0561278968\N,4.4930606466,-0.139568586,-0.075  
1557617\C,4.5091538979,-1.4549884817,-0.0385212298\C,3.3024094801,1.87  
3305244,0.100778601\C,4.0782990056,2.5624837634,-0.8330280052\C,2.6097  
774325,2.5653808218,1.0961846619\C,4.1447512564,3.9504677279,-0.777310  
9644\C,2.6799457186,3.9549291366,1.1386852079\C,3.442926202,4.65093571  
63,0.2029899341\N,-3.9321903466,-0.3038807047,-0.0187143181\N,-2.68252  
11452,-0.8366788317,0.0553078351\N,-1.733777271,1.349599394,-0.1076486  
471\C,-5.4217242465,1.6597493898,0.092591809\C,-3.1514128019,3.2883717  
086,-0.1213411252\C,-4.4103526946,3.8589374126,-0.0475650106\C,-5.5429  
988596,3.04314499,0.0713241774\C,-4.9860791548,-1.2743499747,-0.046377  
3391\C,-5.0157368987,-2.2768025602,0.9240822596\C,-5.9438209901,-1.242  
4497794,-1.0614597527\C,-6.0179687978,-3.2410068023,0.8834637464\C,-6.  
9455422078,-2.2090115863,-1.0897971018\C,-6.9870538298,-3.207842639,-0  
.1186229386\H,-1.0242338929,-2.616486563,0.2169653639\H,0.6700614929,1



.2977276877,-0.0794586114\H,1.2622207473,-3.6147964382,0.2662542194\H,4.627164176,2.0060786428,-1.5810496908\H,2.0379995028,2.0238856909,1.8387312049\H,4.7450339435,4.4851087605,-1.5040708365\H,2.1460568684,4.491035181,1.9144549533\H,3.4964905459,5.7325593223,0.2420316657\H,-4.5196982299,4.9366843459,-0.0697504529\H,-2.2551162328,3.8922883115,-0.1915971102\H,-6.3011636374,1.039916752,0.1954839644\H,-4.2539510669,-2.2942155462,1.6924564201\H,-5.8940505704,-0.4803592498,-1.8291394303\H,-6.0425118251,-4.0179262417,1.6386341036\H,-7.6853248054,-2.1875862687,-1.8814273474\H,-7.7661160311,-3.9605445641,-0.1464409176\H,-6.5269687775,3.4894558672,0.1522491168\C,5.8873998303,-2.0915017081,-0.1571219403\F,6.8521678848,-1.1980043082,-0.4195815201\F,6.2188849851,-2.7250948218,0.9880348827\F,5.9070411009,-3.0126931741,-1.1411909302\Version=ES64L-G09RevD.01\State=3-A\HF=-1667.4890833\S2=2.032437\S2-1=0.\S2A=2.0006\RMSD=6.155e-09\RMSF=2.712e-06\Dipole=-3.6654894,1.6389522,0.1044653\Quadrupole=-1.193174,6.3909012,-5.1977272,19.6043208,-0.5126154,-1.6771973\PG=C01 [X(C27H17F3N6)]\@

**I[3,7]CF<sub>3</sub>,H,Ph -T, syn**

1\1\GINC-LOCALHOST\FOpt\UB3LYP\6-311G(d,p)\C27H17F3N6(3)\PIOTR\11-Jan-2024\0\#\#P UB3LYP/6-311G(d,p) FOpt SCF=Direct Geom=(NoDistance,NoAngle) fcheck freq #P SCRF=(solvent=Benzene)\3-(3-CF3-1-Ph-benzo[e][1,2,4]triazinyl-7)-1-Ph-benzo[e][1,2,4]triazinyl, conformer syn\0,3\C,1.6544872834,-1.4781664835,-0.0700604933\C,3.7210011392,-2.4764154663,-0.0095273734\C,4.3393558234,-1.2022060163,0.1279145404\C,0.1754852455,-1.5902386,-0.1258530455\C,-0.4236004234,-2.8613366207,-0.2197523031\C,-0.6300836774,-0.4484229122,-0.080769511\C,-1.7968632161,-2.9896511752,-0.2396464897\C,-2.0172894108,-0.5689033264,-0.1346945407\C,-2.6299237682,-1.8573400483,-0.1794681138\N,-3.9859074462,-2.009852866,-0.1319617312\N,-2.892103917,0.5272058122,-0.1206956833\N,-4.2340073534,0.3659381902,0.0220387974\C,-4.6668763784,-0.8765593508,0.0079261788\C,-2.467799986,1.8938936894,-0.1856767511\C,-2.9737146816,2.8036911064,0.7444810101\C,-1.6035112893,2.3194762494,-1.1962464681\C,-2.5975097505,4.1404443089,0.6694846049\C,-1.2301850662,3.6590524534,-1.2581523064\C,-1.7221665865,4.5713995644,-0.3266365836\N,3.4840413084,-0.0998832999,0.0676447417\N,2.1320890628,-0.2346714232,0.0291273107\N,2.3641097659,-2.6069006008,-0.1348001759\C,5.7202435161,-1.1060160948,0.3406333719\C,4.5351862254,-3.6236808027,0.0136002499\C,5.9037776824,-3.5189872089,0.1941534738\C,6.4927193527,-2.2603097949,0.3686483654\C,3.940596639,1.2580436277,0.1004116513\C,3.4126598329,2.1306773471,1.0528184963\C,4.8681426325,1.7118977034,-0.8389211156\C,3.8279196214,3.4583770732,1.0716138255\C,5.280557305,3.0414672786,-0.8083542211\C,4.7648458127,3.9164612692,0.1461054089\H,0.216950075,-3.7313094255,-0.2614734977\H,-0.1600305759,0.5199274959,-0.0045107316\H,-2.2761779242,-3.9594594947,-0.2847245663\H,-3.661822027,2.4585735459,1.5046277003\H,-1.2414702365,1.6161527829,-1.935159493\H,-2.9889114706,4.8458869276,1.3930760186\H,-0.5625711651,3.9892404441,-2.0451573352\H,-1.4310347238,5.6137868834,-0.3812537991\H,6.5181004712,-4.4113188761,0.212621351\H,4.0473653334,-4.5837067742,-0.1013741834\H,6.1831885112,-0.1405878553,0.4885495344\H,2.6817985981,1.7639106564,1.7615843106\H,5.2493668735,1.036204914,-1.594432412\H,3.4201088571,4.134720388,1.813711199\H,5.996740432,3.3945719133,-1.5410913304\H,5.0867240248,4.9510544214,0.1646899351\H,7.5606396063,-2.178785092,0.5323717606\C,-6.1731092127,-1.0437143687,0.154932267\F,-6.4643965851,-1.8289055733,1.2128113785\F,-6.8120690597,0.1220960791,0.3287257869\F,-6.6966300997,-1.6372865748,-0.9375110135\Version=ES64L-G09RevD.01\State=3-A\HF=-1667.4892457\S2=2.032692\S2-1=0.\S2A=2.000607\RMSD=5.874e-09\RMSF=2.400e-06\Dipole=3.8225311,2.0283545,0.0200622\Quadrupole=-10.0347625,12.0574069,-2.0226444,-5.0854767,-3.3531714,1.

2652698\PG=C01 [X(C27H17F3N6)]\ \@

**I[3,7]CF<sub>3</sub>,H,Ph -S, anti**

1\1\GINC-LOCALHOST\FOpt\UB3LYP\6-311G(d,p)\C27H17F3N6\PIOTR\12-Jan-2024\0\#P UB3LYP/6-311G(d,p) FOpt SCF=Direct Geom=(NoDistance,NoAngle) f check guess(mix,always) #P freq SCRF=(solvent=Benzene)\3-(3-CF3-1-Ph-benzo[e][1,2,4]triazinyl-7-)-1-Ph-benzo[e][1,2,4]triazinyl, conformer anti\0,1\C,-1.6598978853,0.0321659101,-0.0098434778\C,-2.9912829415,1.8988683897,-0.1021016778\C,-4.1528488851,1.0808388111,-0.0196362043\C,-0.3109954614,-0.5887009689,0.0513582145\C,-0.1518912739,-1.9844712346,0.1486400378\C,0.815351994,0.2344309199,0.0075143096\C,1.1098285357,-2.5435232533,0.1812941655\C,2.0931473249,-0.3226187329,0.0720202041\C,2.2605490398,-1.737259695,0.1288208395\N,3.5007854691,-2.3151248783,0.0997444186\N,3.269165897,0.4378402692,0.056448282\N,4.4926021185,-0.1426556291,-0.0682276969\C,4.5060076614,-1.459842142,-0.0385300708\C,3.3004612971,1.8694751376,0.1061198544\C,4.0742442049,2.5609175548,-0.8275303756\C,2.6109704443,2.5580214408,1.1058481186\C,4.1411237282,3.9487105158,-0.7676539467\C,2.6817831922,3.9474167978,1.1527607364\C,3.4422994716,4.6460382925,0.2170378141\N,-3.9266373659,-0.2989543391,-0.0234611438\N,-2.6794901683,-0.8257808677,0.042502701\N,-1.7332759443,1.3603259568,-0.1219111252\C,-5.4226093291,1.6607084359,0.0900109657\C,-3.1582389687,3.2955665012,-0.134766802\C,-4.4195687373,3.8615277007,-0.0573259132\C,-5.5497959466,3.0438476409,0.067076553\C,-4.9793912063,-1.2720425802,-0.0431312911\C,-5.004050753,-2.2686520801,0.9331816566\C,-5.9394799953,-1.2470003441,-1.0559748342\C,-6.0042743881,-3.2352549888,0.9003820357\C,-6.9387707628,-2.2162565096,-1.0766697756\C,-6.9755422042,-3.2097378975,-0.0997824271\H,-1.0313449971,-2.612447306,0.1812220548\H,0.6701589701,1.3002116566,-0.0797309468\H,1.2538362727,-3.6155705565,0.2305515657\H,4.620964679,2.0065722963,-1.5786605735\H,2.0409560703,2.0140787844,1.8479818451\H,4.7394975602,4.4856109233,-1.4943008672\H,2.1502749103,4.4812428339,1.9317059696\H,3.4963351506,5.7275128445,0.2594471652\H,-4.5318529525,4.9390354376,-0.0810667882\H,-2.2649490371,3.9034081,-0.2092396288\H,-6.2990138218,1.0372142969,0.1970078859\H,-4.2405973055,-2.2798361804,1.7000637476\H,-5.8933590772,-0.4884853179,-1.8273791983\H,-6.0254862468,-4.007892374,1.6599918792\H,-7.6805954509,-2.2008950703,-1.8664911948\H,-7.7529950543,-3.9642861817,-0.1215996\H,-6.5347994777,3.4871723814,0.150596369\C,5.8859130451,-2.0958872109,-0.1465762128\F,6.8510758682,-1.2029739775,-0.4098666054\F,6.2123339181,-2.7214638422,1.0045124657\F,5.911566055,-3.0231846712,-1.1243546773\Version=ES64L-G09RevD.01\State=1-A\HF=-1667.4889943\S2=0.991819\S2-1=0.\S2A=0.189243\RMSD=4.887e-09\RMSF=2.973e-06\Dipole=-3.7014358,1.6076943,0.108157\Quadrupole=-0.8884877,6.147606,-5.2591183,20.3585492,-0.6019195,-1.6234591\PG=C01 [X(C27H17F3N6)]\ \@

**I[3,7]CF<sub>3</sub>,H,Ph -S, syn**

1\1\GINC-LOCALHOST\FOpt\UB3LYP\6-311G(d,p)\C27H17F3N6\PIOTR\12-Jan-2024\0\#P UB3LYP/6-311G(d,p) FOpt SCF=Direct Geom=(NoDistance,NoAngle) f check guess(mix,always) #P freq SCRF=(solvent=Benzene)\3-(3-CF3-1-Ph-benzo[e][1,2,4]triazinyl-7-)-1-Ph-benzo[e][1,2,4]triazinyl, conformer syn\0,1\C,1.6565856525,-1.4804728698,-0.0710707583\C,3.7229956575,-2.4758212143,-0.0202105436\C,4.3399898586,-1.2016084164,0.1251291347\C,0.173296567,-1.5937619134,-0.1244376231\C,-0.4260336533,-2.8638482037,-0.2137888717\C,-0.6298104111,-0.4520112902,-0.0813831853\C,-1.8006829124,-2.9904383064,-0.2305655318\C,-2.0188579336,-0.5716042308,-0.133223948\C,-2.6312098076,-1.8580761142,-0.1731925375\N,-3.9913277726,-2.0082075061,-0.122391827\N,-2.890334442,0.526534592,-0.1195063325\N,-4.2322395514,0.368939435,0.0291647398\C,-4.6671567249,-0.8753162962,0.0183

762312\C,-2.4635716169,1.8918363229,-0.19370453\C,-2.9672612059,2.8084  
504014,0.7310732151\C,-1.5998372492,2.309558272,-1.2081175116\C,-2.588  
6486208,4.1439263678,0.6472801592\C,-1.2242745024,3.648069456,-1.27884  
41085\C,-1.713568838,4.5670593232,-0.3524965343\N,3.4828656224,-0.1006  
610875,0.0721856224\N,2.1311707508,-0.2378536513,0.0351325458\N,2.3660  
711542,-2.6068307794,-0.1449794461\C,5.7210661453,-1.104316764,0.33796  
60811\C,4.5393232305,-3.6215826712,-0.00570091\C,5.9078915587,-3.51554  
7175,0.1745436625\C,6.4953704719,-2.2572464548,0.3575417809\C,3.936807  
3434,1.2579328552,0.1111161477\C,3.4054342877,2.1256414717,1.066154637  
7\C,4.8649627827,1.7173059116,-0.8249741511\C,3.8181842966,3.453984510  
2,1.0910332335\C,5.2744779357,3.047590198,-0.7884563377\C,4.7555960159  
,3.9176595413,0.1687877892\H,0.2133628722,-3.7347341228,-0.2542889702\  
H,-0.1591249252,0.5162327324,-0.0072040586\H,-2.2807519262,-3.96009727  
07,-0.2712683781\H,-3.6552953647,2.4692152725,1.4938848248\H,-1.240534  
0677,1.6011819066,-1.9435186899\H,-2.9780129832,4.854630754,1.36680414  
69\H,-0.5571918836,3.9721923383,-2.0688065037\H,-1.4207398309,5.608581  
1817,-0.4140288872\H,6.5236477601,-4.4070303108,0.1863317353\H,4.05332  
15741,-4.5817610608,-0.1268310183\H,6.1822411488,-0.1390908025,0.49257  
4347\H,2.6741516321,1.7545099405,1.7721778674\H,5.2487033949,1.0454964  
757,-1.5826396911\H,3.4079416922,4.1264856017,1.8352673965\H,5.9909960  
451,3.4051141369,-1.5187078762\H,5.0753838457,4.9527997036,0.192060664  
6\H,7.5632374508,-2.1753643672,0.5212885791\C,-6.1740412089,-1.0375822  
681,0.170329926\F,-6.4644058407,-1.8246793647,1.2268479344\F,-6.808341  
9813,0.1299724253,0.3498279094\F,-6.7033864924,-1.6258206152,-0.922143  
5505\\Version=ES64L-G09RevD.01\State=1-A\HF=-1667.488117\S2=1.024924\S  
2-1=0.\S2A=0.205352\RMSD=5.444e-09\RMSF=3.418e-06\Dipole=3.8438701,2.0  
661458,0.0153554\Quadrupole=-10.0847669,12.0446838,-1.9599169,-5.00545  
73,-3.2682994,1.2518007\PG=C01 [X(C27H17F3N6)]\@

**I[3,7]Me<sub>2</sub>N,H,Ph -T, anti**

1\1\GINC-LOCALHOST\FOpt\UB3LYP\6-311G(d,p)\C28H23N7(3)\PIOTR\13-Jan-20  
24\0\#\#P UB3LYP/6-311G(d,p) FOpt SCF=Direct Geom=(NoDistance,NoAngle)  
fcheck freq #P SCRF=(solvent=Benzene)\3-(3-NMe2-1-Ph-benzo[e][1,2,4]t  
riazinyl-7-)-1-Ph-benzo[e][1,2,4]triazinyl, conformer anti\0,3\C,-1.  
663034531,-0.0086958302,-0.1723644063\C,-2.9949360592,1.8630340835,-0.  
2461170189\C,-4.1587474685,1.050826405,-0.1349051044\C,-0.3143862201,-  
0.6232359996,-0.1375360001\C,-0.1478816257,-2.0227177988,-0.0542198092  
\C,0.813743363,0.1948437175,-0.1926721121\C,1.111369262,-2.580339056,-  
0.0477817324\C,2.094616452,-0.362683471,-0.1509957096\C,2.2717845338,-  
1.7764887837,-0.1133535261\N,3.497724064,-2.3551584156,-0.1568771532\N  
,3.2707025234,0.3876208877,-0.1779795795\N,4.4976841559,-0.180460717,-  
0.3447306982\C,4.5401978215,-1.5261468901,-0.3021732719\C,3.3003333157  
,1.8165606797,-0.1207390821\C,4.0530614427,2.5208669422,-1.0631759505\  
C,2.6277644518,2.4995681115,0.8951683319\C,4.1163183184,3.9086221819,-  
0.9958447195\C,2.6948285314,3.888947048,0.9510011957\C,3.435142448,4.5  
979510096,0.0068049611\N,-3.9393154113,-0.3264384603,-0.1381215141\N,-  
2.6887189489,-0.8630122955,-0.0904672612\N,-1.7413703158,1.3202353431,  
-0.2919789144\C,-5.4225677193,1.641415743,0.0000534585\C,-3.1545599497  
,3.26155835,-0.2816035407\C,-4.4094790948,3.8363074799,-0.1798857146\C  
, -5.5413930969,3.0247634892,-0.0269933658\C,-4.9936479345,-1.295437813  
8,-0.1309445038\C,-4.9899739808,-2.3002717227,0.8380162357\C,-5.986535  
1517,-1.2636561513,-1.1120451739\C,-5.9927292058,-3.2646443526,0.83099  
07647\C,-6.9884199136,-2.2304973462,-1.106986699\C,-6.9964021795,-3.23  
07773174,-0.1364828646\H,-1.0254436081,-2.6533925039,-0.0113870292\H,0  
.6709248234,1.261761978,-0.2706821258\H,1.2519546317,-3.6537075337,-0.  
0079543054\H,4.583261473,1.9728582517,-1.8303870291\H,2.0712129704,1.9

485272024, 1.6422345393\H, 4.6970110282, 4.452655134, -1.7319187198\H, 2.17  
51237778, 4.4151158243, 1.7432760116\H, 3.4858884774, 5.6794439014, 0.05541  
28481\H, -4.5161921166, 4.9143635337, -0.2062619288\H, -2.2583423409, 3.862  
0601343, -0.3779257958\H, -6.3007828255, 1.0249143991, 0.1303616902\H, -4.2  
006890685, -2.3192323417, 1.5779714053\H, -5.9636123617, -0.5013462149, -1.  
8807156957\H, -5.9903479241, -4.04268964, 1.5855173166\H, -7.7549190297, -2  
.2083094295, -1.8728719665\H, -7.7757736056, -3.9837495837, -0.1382781295\  
H, -6.5218523074, 3.4743565732, 0.0763853706\N, 5.7933524231, -2.0761851697  
, -0.392986321\C, 6.9593981626, -1.2425516018, -0.640694365\H, 6.8518056345  
, -0.2861370392, -0.1353396656\H, 7.8427428591, -1.7562886875, -0.255242456  
7\H, 7.1110389944, -1.0522008977, -1.71234373\C, 5.9619940653, -3.503735266  
8, -0.6201840822\H, 5.0625937681, -4.0274152227, -0.3120884122\H, 6.1536066  
764, -3.7209030834, -1.6802373445\H, 6.8128354859, -3.8662316258, -0.036788  
0604\Version=ES64L-G09RevD.01\State=3-A\HF=-1464.3725843\S2=2.027929\  
S2-1=0.\S2A=2.000447\RMSD=5.047e-09\RMSF=2.527e-06\Dipole=-0.9957303, 0  
.501265, -0.0484289\Quadrupole=18.9476968, -2.1351625, -16.8125343, 4.5995  
628, -3.2857001, -0.7391353\PG=C01 [X(C28H23N7)]\@

**I[3,7]Me<sub>2</sub>N,H,Ph -T, syn**

1\1\GINC-LOCALHOST\FOpt\UB3LYP\6-311G(d,p)\C28H23N7(3)\PIOTR\13-Jan-20  
24\0\#\#P UB3LYP/6-311G(d,p) FOpt SCF=Direct Geom=(NoDistance,NoAngle)  
fcheck freq #P SCRF=(solvent=Benzene)\3-(3-NMe2-1-Ph-benzo[e][1,2,4]t  
riazinyl-7)-1-Ph-benzo[e][1,2,4]triazinyl, conformer syn\0,3\C,1.59  
47955136, -1.4705939021, -0.2456646583\C, 3.6550900517, -2.4869135216, -0.1  
901752737\C, 4.2856387641, -1.2225352747, -0.0199413402\C, 0.1177965768, -1  
.5677344858, -0.3132397241\C, -0.4973664398, -2.8320325478, -0.4253022968\  
C, -0.6799192726, -0.4230257066, -0.2624394282\C, -1.8701228813, -2.9462088  
003, -0.4579537985\C, -2.0714828314, -0.529807333, -0.3287433532\C, -2.7027  
629274, -1.8076464452, -0.391412024\N, -4.0515010428, -1.9506001869, -0.369  
4009573\N, -2.9361353382, 0.5640001679, -0.3134467877\N, -4.2879147613, 0.4  
328960855, -0.2099071269\C, -4.7654190272, -0.8264733521, -0.2228577882\C,  
-2.4930385811, 1.9238742044, -0.3606706901\C, -2.975928287, 2.829334714, 0.  
5864462031\C, -1.6284835436, 2.3542542484, -1.3692983837\C, -2.5796205076,  
4.1613672594, 0.530335391\C, -1.2348946876, 3.688901925, -1.4142883618\C, -  
1.7059603574, 4.595264143, -0.4661950634\N, 3.4408684398, -0.1123252887, -0  
.0676960572\N, 2.0867148055, -0.2327180071, -0.1160391644\N, 2.2996761765,  
-2.6022225353, -0.3310406954\C, 5.6653896476, -1.1453834813, 0.2111265496\  
C, 4.4594836821, -3.6422221971, -0.1836290726\C, 5.8269011539, -3.555606165  
6, 0.013759266\C, 6.4267304684, -2.3071623273, 0.2227393306\C, 3.9080591821  
, 1.2399422061, -0.0085592777\C, 3.3615619464, 2.1083587931, 0.9377342094\C  
, 4.8639315491, 1.6972076832, -0.9178920143\C, 3.7866871229, 3.432227259, 0.  
981680376\C, 5.2858163606, 3.0229780171, -0.8624445801\C, 4.7520067131, 3.8  
92619944, 0.0869203556\H, 0.1328716217, -3.7095593838, -0.4721774856\H, -0.  
2045283887, 0.5415558444, -0.1708044418\H, -2.3539641551, -3.9133383333, -0  
.5201872939\H, -3.6584371703, 2.4807357358, 1.3500552671\H, -1.2796419476,  
1.6550880154, -2.1184671134\H, -2.9524480908, 4.8610411171, 1.2695697705\H  
, -0.5664424858, 4.0202373421, -2.2003393521\H, -1.3985888745, 5.6337481689  
, -0.5067973421\H, 6.431997489, -4.4545720693, 0.0189461072\H, 3.9634285034  
, -4.5946312637, -0.3246764222\H, 6.1361067291, -0.1881851373, 0.3860750774  
\H, 2.6072644188, 1.7404175269, 1.6206564396\H, 5.259452426, 1.0269312659, -  
1.6707870087\H, 3.3635170561, 4.104182519, 1.7192537824\H, 6.023762456, 3.3  
776745735, -1.5725957648\H, 5.0812440602, 4.9244227381, 0.1248483435\H, 7.4  
934874912, -2.2398162989, 0.4004324601\N, -6.1246140559, -0.9418858356, -0.  
072915284\C, -6.977982822, 0.2370696175, -0.1016274124\H, -7.9123278547, 0.  
002346481, 0.4121119313\H, -6.492035367, 1.0675356107, 0.4033842403\H, -7.2  
148021082, 0.5496088859, -1.1281777458\C, -6.7818627058, -2.2176592268, -0.  
3173196661\H, -6.0867841714, -3.0279064609, -0.1201733089\H, -7.6461268545

, -2.3070628243, 0.3454909132\H, -7.1319586169, -2.3016510599, -1.355793044  
1\Version=ES64L-G09RevD.01\State=3-A\HF=-1464.3725554\S2=2.028199\S2-  
1=0.\S2A=2.000453\RMSD=5.008e-09\RMSF=1.915e-06\Dipole=0.9253791, 1.772  
5707, 0.1277543\Quadrupole=15.6877513, -1.8803477, -13.8074035, 2.0227545,  
-3.7748903, 1.5072788\PG=C01 [X(C28H23N7)]\@

**I[3,7]Me<sub>2</sub>N,H,Ph -S, anti**

1\1\GINC-LOCALHOST\FOpt\UB3LYP\6-311G(d,p)\C28H23N7\PIOTR\14-Jan-2024\  
0\#P UB3LYP/6-311G(d,p) FOpt SCF=Direct Geom=(NoDistance,NoAngle) fch  
eck guess(mix,always) #P freq SCRF=(solvent=Benzene)\3-(3-NMe2-1-Ph-b  
enzo[e][1,2,4]triazinyl-7-)-1-Ph-benzo[e][1,2,4]triazinyl, conformer  
anti\0,1\C, -1.6608951205, 0.0003675457, -0.1735130757\C, -2.9941941136, 1  
.8703843219, -0.2299356566\C, -4.1566181847, 1.0562214404, -0.1237724652\C  
, -0.3150659499, -0.6205425779, -0.1424677911\C, -0.1522096799, -2.01991306  
58, -0.0668623267\C, 0.8133553985, 0.1965338569, -0.1937252818\C, 1.1073530  
874, -2.5801262941, -0.0615131282\C, 2.0939859971, -0.3643649542, -0.155376  
0796\C, 2.2681954232, -1.7790957029, -0.1215712858\N, 3.4958013874, -2.3579  
915241, -0.1628806977\N, 3.2688567305, 0.3837049159, -0.1820339375\N, 4.497  
3876444, -0.1822915676, -0.3361941978\C, 4.5386514611, -1.5299427307, -0.29  
68402947\C, 3.2968623858, 1.8142582083, -0.1329893068\C, 4.0306970165, 2.51  
37292309, -1.093114287\C, 2.640819272, 2.5003613655, 0.8909200516\C, 4.0918  
774111, 3.9020595269, -1.034925208\C, 2.7057391874, 3.8902568064, 0.9378807  
576\C, 3.4274384685, 4.5951070436, -0.0236514706\N, -3.9334956878, -0.32303  
65703, -0.1388827743\N, -2.6848710265, -0.8555399858, -0.0996299517\N, -1.7  
39268484, 1.3298115476, -0.281594065\C, -5.4215569162, 1.6406204695, 0.0187  
746811\C, -3.1585540309, 3.2682903687, -0.2533444096\C, -4.4155531799, 3.83  
85981627, -0.1442635773\C, -5.5453809449, 3.0242488754, 0.0038716712\C, -4.  
9869958169, -1.2936463186, -0.137962802\C, -4.9830698434, -2.3034259708, 0.  
8256353921\C, -5.9787521462, -1.2571274225, -1.1199102916\C, -5.9845655909  
, -3.2690927267, 0.8120555849\C, -6.9791854619, -2.2254493404, -1.121537561  
9\C, -6.9869235971, -3.2311276246, -0.1565834722\H, -1.0308518114, -2.64914  
02511, -0.0281889175\H, 0.6716548662, 1.2639648392, -0.266884795\H, 1.24546  
3241, -3.6539715865, -0.0258710181\H, 4.5481312753, 1.9623759682, -1.866751  
5435\H, 2.0980991033, 1.951536824, 1.6497887126\H, 4.6576757413, 4.44343342  
81, -1.7843904238\H, 2.1988596811, 4.4200275379, 1.7359981687\H, 3.47652583  
45, 5.6769715739, 0.0179345745\H, -4.5244606606, 4.9167099145, -0.161448446  
5\H, -2.2646908874, 3.8728800668, -0.3461141591\H, -6.2974089464, 1.0198622  
831, 0.1451667982\H, -4.1949260372, -2.3251539574, 1.5667800034\H, -5.95609  
87767, -0.4900248725, -1.8837951529\H, -5.9822260641, -4.0512141218, 1.5623  
365111\H, -7.7449138871, -2.1999674289, -1.8880758003\H, -7.7653358918, -3.  
9850587349, -0.1635005651\H, -6.5268231067, 3.4702594515, 0.1126479955\N, 5  
.7926087273, -2.0783330773, -0.3789679931\C, 6.9611922384, -1.2455403665, -  
0.6181271271\H, 6.845795569, -0.2848189904, -0.1230266058\H, 7.8398769096,  
-1.7547446325, -0.2162429718\H, 7.1269356773, -1.0652408657, -1.6893668394  
\C, 5.9644143279, -3.5070951998, -0.595383798\H, 5.0625273411, -4.029425808  
1, -0.2923104013\H, 6.1657538026, -3.7305784021, -1.6522427416\H, 6.8103185  
775, -3.8651127608, -0.0020946665\Version=ES64L-G09RevD.01\State=1-A\HF  
=-1464.3728141\S2=0.993044\S2-1=0.\S2A=0.186496\RMSD=8.020e-09\RMSF=4.  
893e-06\Dipole=-0.9182452, 0.4790998, -0.0436372\Quadrupole=19.1204134, -  
2.29212, -16.8282934, 5.2351056, -3.2103377, -0.7712505\PG=C01 [X(C28H23N7  
)\@

**I[3,7]Me<sub>2</sub>N,H,Ph -S, syn**

1\1\GINC-LOCALHOST\FOpt\UB3LYP\6-311G(d,p)\C28H23N7\PIOTR\15-Jan-2024\  
0\#P UB3LYP/6-311G(d,p) FOpt SCF=Direct Geom=(NoDistance,NoAngle) fch  
eck guess(mix,always) #P freq SCRF=(solvent=Benzene)\3-(3-NMe2-1-Ph-b  
enzo[e][1,2,4]triazinyl-7-)-1-Ph-benzo[e][1,2,4]triazinyl, conformer

syn\0,1\C,1.5958974252,-1.4719038096,-0.2462941702\C,3.656640416,-2.4852232877,-0.1980518703\C,4.2857161568,-1.2207232801,-0.0219522834\C,0.116106767,-1.5716505016,-0.3123775275\C,-0.4991871024,-2.8350982565,-0.4195492256\C,-0.6803352497,-0.4268639968,-0.2650524162\C,-1.8733437165,-2.9478830292,-0.4511931344\C,-2.0728260987,-0.5336726193,-0.3306250897\C,-2.7042011208,-1.8096376831,-0.3895225715\N,-4.0566253996,-1.9500806735,-0.3690715572\N,-2.9351121773,0.5626658789,-0.3161485492\N,-4.2858356491,0.4351487546,-0.2104912498\C,-4.7664589854,-0.826325895,-0.2242388534\C,-2.4881516655,1.9214331931,-0.3654609271\C,-2.963732951,2.8281192674,0.5841046911\C,-1.6272294743,2.3489191327,-1.3783314515\C,-2.5634609848,4.158873577,0.526161907\C,-1.2296264906,3.6823468955,-1.4251206927\C,-1.6932731119,4.5900001843,-0.4746489354\N,3.4395502356,-0.1119705348,-0.0644515032\N,2.0851225918,-0.2344497243,-0.1110667742\N,2.3012326684,-2.601195241,-0.338774373\C,5.6656794022,-1.1427710923,0.2092780745\C,4.4626895204,-3.63931755,-0.1977627283\C,5.8300356369,-3.5516381838,-0.000504838\C,6.4284149698,-2.3034002795,0.2147321123\C,3.9044272984,1.2408072598,-0.0011098542\C,3.3548986672,2.1058415019,0.9465852844\C,4.8609020542,1.7020326182,-0.9078576746\C,3.7778951043,3.430214315,0.9947286542\C,5.2803896244,3.0283637298,-0.8483052047\C,4.7437804374,3.8945760894,0.1026157767\H,0.1298928504,-3.7136039643,-0.4636865261\H,-0.204745699,0.537912831,-0.1759807979\H,-2.3574643388,-3.9151445523,-0.5097514392\H,-3.6434706488,2.4814403284,1.3510794292\H,-1.284609726,1.6486052328,-2.1293194225\H,-2.930360284,4.8597006884,1.2672552975\H,-0.5639566193,4.0117175947,-2.2143393949\H,-1.3828398624,5.6275152644,-0.516668992\H,6.4364103028,-4.4497610193,-0.000142824\H,3.9680205921,-4.5917518862,-0.3433655814\H,6.1350106055,-0.1858180898,0.3891813393\H,2.6001183199,1.7348094976,1.6272645074\H,5.2585871495,1.0345019169,-1.6620285445\H,3.3525608793,4.0995002787,1.7334773836\H,6.0187152452,3.3861903224,-1.5564820829\H,5.0712559223,4.9268118813,0.1437784313\H,7.4951219916,-2.2356768171,0.3925382279\N,-6.1261030623,-0.9362372737,-0.0762350313\C,-6.9822615537,0.2403365057,-0.1163840288\H,-7.8967274,0.0261191201,0.4409168105\H,-6.4782251619,1.0890025818,0.3369626644\H,-7.2587964783,0.5113870519,-1.1448427503\C,-6.7845545797,-2.214926539,-0.2998782256\H,-6.0902182431,-3.0228876237,-0.0909438655\H,-7.6488191454,-2.2925508883,0.3645457208\H,-7.1353356041,-2.3143865621,-1.3367039399\Version=ES64L-G09RevD.01\State=1-A\HF=-1464.3717536\S2=1.02479\S2-1=0.\S2A=0.200309\RMSD=9.582e-09\RMSF=4.915e-06\Dipole=0.9491776,1.8192746,0.1343321\Quadrupole=15.723039,-1.9625729,-13.760466,1.8418387,-3.7807869,1.4548569\PG=C01 [X(C28H23N7)]\@

**I[3,7]Me<sub>2</sub>N,CF<sub>3</sub>,Ph -T, anti**

1\1\GINC-LOCALHOST\FOpt\UB3LYP\6-311G(d,p)\C29H22F3N7(3)\PIOTR\15-Jan-2024\0\#\#P UB3LYP/6-311G(d,p) FOpt SCF=Direct Geom=(NoDistance,NoAngle) fcheck freq #P SCRF=(solvent=Benzene)\3-(3-NMe2-1-Ph-benzo[e][1,2,4]triazinyl-7-)-1-Ph-7-CF3-benzo[e][1,2,4]triazinyl, conformer anti\0,3\C,-1.4449713902,-0.0082473573,-0.0137126542\C,-2.7010352055,1.9116248058,-0.1287511895\C,-3.8974786408,1.1452019191,-0.0401881939\C,-0.1235572002,-0.671172469,0.0481868339\C,-0.0112994648,-2.0757948488,0.1403792331\C,1.0356187701,0.104590149,0.0074811117\C,1.2256161781,-2.6798228051,0.1708508163\C,2.2929585198,-0.500568493,0.0724639844\C,2.4165941005,-1.9199851092,0.12153307\N,3.6200993674,-2.5431517175,0.1044829875\N,3.4960809887,0.2050688982,0.0589522456\N,4.7043006529,-0.4075827816,-0.0742953976\C,4.696405344,-1.7546469145,-0.0214224126\C,3.5741597952,1.6336156238,0.0984622791\C,4.3414718467,2.3012303128,-0.858045326\C,2.9301812351,2.3488737133,1.1101944234\C,4.4476545148,3.6872797882,-0.8091313302\C,3.0403571748,3.7361558238,1.1479761114\C,3.7952074135,

4.4096185116,0.1894502452\N,-3.7320622228,-0.2374003942,-0.0196325758\  
N,-2.5056354037,-0.8208648073,0.0521856377\N,-1.4721194932,1.324581074  
5,-0.1390517025\C,-5.1413477852,1.7791716052,0.0525575245\C,-2.8091724  
575,3.3163350789,-0.1812874825\C,-4.0400583587,3.9382008669,-0.1207920  
251\C,-5.2053696376,3.1666172561,0.0073329048\C,-4.8270814766,-1.16308  
48982,-0.0051190257\C,-4.8922322838,-2.1213405586,1.0068528989\C,-5.78  
98726334,-1.1296582066,-1.0147439067\C,-5.937502507,-3.0392436491,1.01  
40703984\C,-6.8345543874,-2.0501239257,-0.9952948419\C,-6.9128006833,-  
3.0034668538,0.0181526947\H,-0.9123129578,-2.6732017585,0.1714091342\H  
,0.9353671211,1.1756717205,-0.0793952406\H,1.3251267931,-3.7573107896,  
0.2194757912\H,4.8489770106,1.7272834944,-1.6218154288\H,2.3621657087,  
1.8240886671,1.8676936605\H,5.0393855684,4.2040155234,-1.5559315037\H,  
2.5430629061,4.2881797654,1.9369890935\H,3.8798081649,5.4894982318,0.2  
23838595\H,-4.1086727985,5.0181698828,-0.1547515199\H,-1.8916050231,3.  
8857721405,-0.2571390667\H,-6.0461048659,1.2013280841,0.166382203\H,-4  
.1252972311,-2.1410898462,1.7700793325\H,-5.7123001151,-0.4041760345,-  
1.8150389304\H,-5.9913252212,-3.7814916279,1.8018566912\H,-7.579834327  
1,-2.0275270904,-1.7816097685\H,-7.7261678623,-3.7194256441,0.02811643  
67\N,5.9284789502,-2.350985747,-0.0795970387\C,7.1332561851,-1.5674209  
783,-0.3060400627\H,7.0394863879,-0.5904728071,0.1608420997\H,7.981553  
5663,-2.0969046767,0.1332984497\H,7.3339020779,-1.4225766896,-1.376550  
5031\C,6.050691226,-3.7890128104,-0.2678996525\H,5.1244858776,-4.27277  
75933,0.025837134\H,6.2643956341,-4.0377006512,-1.3165116662\H,6.87129  
03847,-4.1669821318,0.3481244312\C,-6.5369353638,3.857004452,0.0530476  
025\F,-7.5246593341,3.0525706078,0.502307256\F,-6.9212451754,4.2954015  
462,-1.1726076502\F,-6.5148333771,4.9472991329,0.8541185143\Version=E  
S64L-G09RevD.01\State=3-A\HF=-1801.5118744\S2=2.027375\S2-1=0.\S2A=2.0  
00436\RMSD=9.230e-09\RMSF=4.550e-06\Dipole=0.4121895,-0.3779793,-0.083  
3407\Quadrupole=8.2639208,-0.2614983,-8.0024225,18.6188127,-2.6424533,  
-0.9948487\PG=C01 [X(C29H22F3N7)]\@

**I[3,7]Me<sub>2</sub>N,CF<sub>3</sub>,Ph -T, syn**

1\1\GINC-LOCALHOST\FOpt\UB3LYP\6-311G(d,p)\C29H22F3N7(3)\PIOTR\18-Jan-  
2024\0\#\#P UB3LYP/6-311G(d,p) FOpt SCF=Direct Geom=(NoDistance,NoAngle  
) fcheck freq #P SCRF=(solvent=Benzene)\3-(3-NMe2-1-Ph-benzo[e][1,2,4  
]triazinyl-7-)-1-Ph-7-CF3\_benzo[e][1,2,4] triazinyl, conformer syn\0,  
3\C,-1.4644042198,-1.4825339388,0.0495158403\C,-3.5472734976,-2.448881  
9272,0.0042481734\C,-4.151353597,-1.1651985048,-0.1163980379\C,0.00753  
2746,-1.6185680149,0.0897094902\C,0.5903657761,-2.8999653844,0.1822137  
206\C,0.8346100011,-0.4941958048,0.0342013533\C,1.959506528,-3.0504100  
069,0.1970338053\C,2.2231367093,-0.6383204832,0.0790483827\C,2.8211545  
396,-1.9331805808,0.1286536302\N,4.1640186145,-2.1111121522,0.09315170  
24\N,3.116254423,0.4315967877,0.0537095862\N,4.4627632448,0.2660864023  
, -0.0578686535\C,4.9079911843,-1.0057827138,-0.0509630942\C,2.70715969  
12,1.8031138104,0.1003657053\C,3.1877059188,2.688738947,-0.8659710573\  
C,1.8771465389,2.2606708102,1.1254954684\C,2.8225574859,4.0298950453,-  
0.8124597113\C,1.5138296176,3.6040562439,1.1674307181\C,1.9820558965,4  
.4912742025,0.2001431773\N,-3.2808125553,-0.0776111841,-0.0574899315\N  
, -1.9309647381,-0.2303903603,-0.0343530501\N,-2.1977021484,-2.60010893  
82,0.1136928064\C,-5.5300189872,-1.0454276077,-0.3148714757\C,-4.38132  
03329,-3.5842802873,-0.0201012374\C,-5.7472259933,-3.4617323566,-0.184  
543672\C,-6.3185686121,-2.1909847064,-0.3433723556\C,-3.7216840433,1.2  
86733625,-0.0756924426\C,-3.1918923771,2.1597710731,-1.0262829511\C,-4  
.6369416155,1.741921107,0.8746985228\C,-3.5942997253,3.4915218809,-1.0  
319667058\C,-5.0363006078,3.0756784105,0.8570548415\C,-4.5192703932,3.  
9517898275,-0.0954848894\H,-0.0612927512,-3.7615367883,0.229907976\H,0  
.3842702791,0.4832428474,-0.0449633946\H,2.4183448349,-4.030288517,0.2

474653848\H, 3.8436619881, 2.3183494571, -1.6425872327\H, 1.531442224, 1.57  
60843902, 1.8895035552\H, 3.19363473, 4.7148625157, -1.5661250382\H, 0.8716  
062358, 3.9569222542, 1.9658229213\H, 1.6988616222, 5.5366654772, 0.2384638  
504\H, -6.3758274558, -4.342418273, -0.2102816408\H, -3.9094522844, -4.5535  
511922, 0.0792386752\H, -5.9826871692, -0.0750469888, -0.4550328502\H, -2.4  
700891166, 1.7903873802, -1.742829694\H, -5.0190925458, 1.0644486791, 1.628  
1548555\H, -3.1860436269, 4.1693262148, -1.7724069522\H, -5.7439283304, 3.4  
303535454, 1.5971447635\H, -4.8315649333, 4.9894202416, -0.1047325509\N, 6.  
2616957941, -1.1559392567, -0.2055292542\C, 7.147662432, -0.0008477315, -0.  
2018956036\H, 8.057457039, -0.2585097619, -0.748061113\H, 6.6678650962, 0.8  
453770175, -0.6858970201\H, 7.427738276, 0.2979331447, 0.817603684\C, 6.891  
6947426, -2.4476220392, 0.0270440636\H, 6.161446104, -3.2383105168, -0.1134  
339571\H, 7.714832891, -2.5794387508, -0.6799754045\H, 7.2967406761, -2.519  
278768, 1.0459540725\C, -7.8060798138, -2.0605283156, -0.4897597349\F, -8.4  
32432926, -2.0205789126, 0.7145317472\F, -8.3452283835, -3.1007267143, -1.1  
638541982\F, -8.1638449601, -0.9324829995, -1.143165989\Version=ES64L-G0  
9RevD.01\State=3-A\HF=-1801.5119007\S2=2.027766\S2-1=0.\S2A=2.000446\R  
MSD=5.031e-09\RMSF=4.652e-06\Dipole=0.8166648, 1.9719816, 0.0365593\Quad  
rupole=-5.4246896, 10.5615306, -5.1368411, -5.1638255, -6.5720924, -1.57592  
5\PG=C01 [X(C29H22F3N7)]\@

**I[3,7]Me<sub>2</sub>N,CF<sub>3</sub>,Ph -S, anti**

1\1\GINC-LOCALHOST\FOpt\UB3LYP\6-311G(d,p)\C29H22F3N7\PIOTR\19-Jan-202  
4\0\#P UB3LYP/6-311G(d,p) FOpt SCF=Direct Geom=(NoDistance,NoAngle) f  
check guess(mix,always) #P freq SCRF=(solvent=Benzene)\3-(3-NMe2-1-Ph  
-benzo[e][1,2,4]triazinyl-7)-1-Ph-7-CF3-benzo[e][1,2,4]triazinyl, co  
nformer anti\0,1\C, -1.441610519, 0.0047698235, -0.0176283989\C, -2.69967  
7139, 1.9225368629, -0.1198197845\C, -3.894922362, 1.15387219, -0.034429484  
2\C, -0.1241536549, -0.664538107, 0.0413270748\C, -0.0167060955, -2.0694813  
479, 0.1254576395\C, 1.0357130987, 0.1094750869, 0.0051091043\C, 1.21939492  
26, -2.6773973768, 0.1547606907\C, 2.2922288351, -0.5000944005, 0.066954126  
2\C, 2.411582757, -1.9212201645, 0.1111566048\N, 3.6151098218, -2.545389159  
4, 0.0958868477\N, 3.4945475104, 0.201245784, 0.0554519804\N, 4.7033490258,  
-0.4103525679, -0.0650134999\C, 4.6931765543, -1.7588687031, -0.0176991289  
\C, 3.5733557871, 1.631373073, 0.0901094496\C, 4.3239713274, 2.2953690863, -  
0.88137839\C, 2.9461492161, 2.347920124, 1.1106910587\C, 4.430579683, 3.681  
6428242, -0.8380400694\C, 3.0566871902, 3.7353862128, 1.1430801581\C, 3.795  
102657, 4.4060270651, 0.1699461526\N, -3.7247410823, -0.2318359925, -0.0222  
117736\N, -2.4999799996, -0.8098544641, 0.0421748641\N, -1.4692571946, 1.33  
8240627, -0.1340444531\C, -5.1397833559, 1.781006139, 0.0644781872\C, -2.81  
40572875, 3.3266849913, -0.1639315009\C, -4.0479585475, 3.9440432148, -0.09  
82282282\C, -5.2105353426, 3.169811091, 0.0274771805\C, -4.8183012735, -1.1  
598609978, -0.0119428026\C, -4.8819651924, -2.1223529827, 0.995947756\C, -5  
.7807159391, -1.1235363119, -1.0217802916\C, -5.9251847758, -3.0426901894,  
0.9984575258\C, -6.8231703022, -2.0465557319, -1.0071111513\C, -6.89981283  
5, -3.0046496111, 0.0020336399\H, -0.9194357411, -2.6642479751, 0.151830495  
7\H, 0.9371073866, 1.1811283479, -0.076551984\H, 1.3155832151, -3.755378134  
5, 0.1986354749\H, 4.8181705525, 1.7194232724, -1.652445341\H, 2.3902183298  
, 1.8244786849, 1.8780870333\H, 5.0091853823, 4.1967486358, -1.5961052792\H  
, 2.5724170866, 4.2896283039, 1.9385571266\H, 3.8799549499, 5.4860137334, 0.  
1999938372\H, -4.1193573046, 5.0239947996, -0.1257490097\H, -1.8991819209,  
3.9008018894, -0.2372072962\H, -6.0418829139, 1.1985285958, 0.1772660199\H  
, -4.1157778732, -2.143475576, 1.7599416047\H, -5.7046402227, -0.3936688248  
, -1.8181988963\H, -5.9779640235, -3.788412871, 1.7830178307\H, -7.56820009  
61, -2.0219884951, -1.7935976348\H, -7.711653978, -3.7223800678, 0.00834489  
63\N, 5.9247269379, -2.355402746, -0.0684656773\C, 7.1331403958, -1.5732801  
766, -0.2810197562\H, 7.0336983648, -0.594607579, 0.1808635543\H, 7.9750271



223,-2.1016610061,0.1718068652\H,7.3482170955,-1.4330497024,-1.3492428  
501\C,6.0482708719,-3.7940603409,-0.2512022153\H,5.1165504725,-4.27586  
9006,0.027899011\H,6.2791920992,-4.044689901,-1.2955596976\H,6.8580120  
093,-4.1718920296,0.3791715132\C,-6.5471522664,3.8485418486,0.07036355  
52\F,-7.5112722166,3.0619265308,0.5979987239\F,-6.975988963,4.20452812  
49,-1.1679907337\F,-6.5166856604,4.9868315871,0.800943475\\Version=ES6  
4L-G09RevD.01\State=1-A\HF=-1801.5124141\S2=0.979305\S2-1=0.\S2A=0.176  
561\RMSD=9.485e-09\RMSF=3.722e-06\Dipole=0.6040721,-0.4403133,-0.07457  
24\Quadrupole=8.4331243,-0.3327499,-8.1003743,19.0818943,-2.5195252,-1  
.0087739\PG=C01 [X(C29H22F3N7)]\@

**I[3,7]Me<sub>2</sub>N,CF<sub>3</sub>,Ph -S, syn**

1\1\GINC-LOCALHOST\UOpt\UB3LYP\6-311G(d,p)\C29H22F3N7\PIOTR\21-Jan-202  
4\0\#P UB3LYP/6-311G(d,p) FOpt SCF=Direct Geom=(NoDistance,NoAngle) f  
check guess(mix,always) #P freq SCRF=(solvent=Benzene)\3-(3-NMe2-1-Ph  
-benzo[e][1,2,4]triazinyl-7-)-1-Ph-7-CF<sub>3</sub>\_benzo[e][1,2,4] triazinyl, co  
nformer syn\0,1\C,-1.4657523122,-1.4846268117,0.0516752037\C,-3.54856  
12146,-2.4488715905,0.0105495343\C,-4.1516223689,-1.1651116083,-0.1157  
578844\C,0.0087847898,-1.6219312568,0.0914443755\C,0.5920878297,-2.902  
2048803,0.1838213936\C,0.8347671968,-0.497605776,0.0360097863\C,1.9623  
09684,-3.0511886531,0.1985748924\C,2.2240075622,-0.6412864808,0.081500  
8499\C,2.8223301816,-1.9341474749,0.1312594375\N,4.1683214705,-2.11024  
75864,0.0971449251\N,3.1152869093,0.4312844938,0.0548480636\N,4.460672  
227,0.2681271806,-0.0607653085\C,4.9084912133,-1.0055491352,-0.0503810  
927\C,2.7035215545,1.8019352938,0.1028245648\C,3.1831425236,2.68958547  
85,-0.8622020278\C,1.872114164,2.2568293207,1.1280809429\C,2.815443647  
6,4.0299481307,-0.8073757956\C,1.5062897883,3.5995079786,1.171239702\C  
,1.9734423005,4.4886591135,0.2052361621\N,-3.2796899648,-0.0783982023,  
-0.0597453184\N,-1.9302930773,-0.2329878534,-0.0367878528\N,-2.1992603  
287,-2.6005214205,0.1214452117\C,-5.5299087987,-1.0442805894,-0.316560  
2323\C,-4.38414006,-3.5832161384,-0.009580014\C,-5.7497221318,-3.45949  
55999,-0.1759396318\C,-6.3198129502,-2.1888958862,-0.3410484351\C,-3.7  
188134181,1.2864358101,-0.0801920679\C,-3.1852784535,2.1580289195,-1.0  
300525847\C,-4.636012061,1.7434268389,0.8675074116\C,-3.5860722454,3.4  
902312809,-1.0378241748\C,-5.033421825,3.0777030697,0.8478837886\C,-4.  
5128115842,3.9523971596,-0.1040232778\H,-0.0585335578,-3.7645847711,0.  
2314121635\H,0.3842108939,0.4797019582,-0.0441671468\H,2.4215682636,-4  
.030923808,0.2486862765\H,3.8401727541,2.3212085964,-1.6388555033\H,1.  
5276997473,1.5709166042,1.8914710963\H,3.1856752183,4.716429577,-1.560  
0754374\H,0.8630391483,3.9503015902,1.9697112774\H,1.6883317545,5.5334  
874557,0.2445817891\H,-6.3792968241,-4.3395967711,-0.1984923363\H,-3.9  
137351735,-4.5527093531,0.0943339329\H,-5.9810886796,-0.0739104773,-0.  
4615457644\H,-2.4621526987,1.7871263149,-1.7444519065\H,-5.0209765446,  
1.0670499444,1.6204866508\H,-3.1751323674,4.1669282552,-1.7777817229\H  
, -5.7424155249,3.4338828329,1.5859303105\H,-4.8237384029,4.9904181025,  
-0.1148560887\N,6.2624371917,-1.1515820172,-0.205040027\C,7.1506640863  
,0.0017705349,-0.1954939122\H,8.0440325659,-0.2405811135,-0.7752206454  
\H,6.65797773,0.8615652485,-0.640216376\H,7.4615934378,0.2694481283,0.  
8237271237\C,6.8928093998,-2.4455445633,0.0124803768\H,6.1648731483,-3  
.2353843152,-0.1440710709\H,7.7208821826,-2.5647611366,-0.6909831217\H  
,7.2913188193,-2.5318143524,1.0328163235\C,-7.8069056893,-2.0576809192  
, -0.4896651979\F,-8.4350031281,-2.0135256919,0.7135955752\F,-8.3461271  
427,-3.0994820055,-1.1612988667\F,-8.1628747165,-0.9312561126,-1.14697  
67387\\Version=ES64L-G09RevD.01\State=1-A\HF=-1801.5111086\S2=1.023009  
\S2-1=0.\S2A=0.196734\RMSD=6.190e-09\RMSF=6.950e-06\Dipole=0.8051151,2  
.0152188,0.0301625\Quadrupole=-5.4341254,10.5331479,-5.0990225,-5.0265  
647,-6.6397692,-1.5372332\PG=C01 [X(C29H22F3N7)]\@

**I[3,7]H,H,2-Pyr -T, anti**

```
1\1\GINC-LOCALHOST\FOpt\UB3LYP\6-311G(d,p)\C24H16N8(3)\PIOTR\16-Jan-20
24\0\#\#P UB3LYP/6-311G(d,p) FOpt SCF=Direct Geom=(NoDistance,NoAngle)
fcheck freq #P SCRF=(solvent=Benzene)\3-(3-H-1-Pyridine-benzo[e][1,2,
4]triazinyl-7-)-1-Pyridine-benzo[e][1,2,4]triazinyl, conformer anti\
0,3\C,-0.8286358334,-0.1090722907,-0.1200254729\C,-1.7148251012,1.9986
133265,-0.2776839836\C,-3.0330390846,1.481534618,-0.1122566155\C,0.348
5703328,-1.0146291408,-0.0990422909\C,0.1873206894,-2.4148083174,-0.07
41577712\C,1.6304006581,-0.4635640141,-0.1052503213\C,1.2899884648,-3.
2384683431,-0.0812194899\C,2.7558972264,-1.290847867,-0.0820376161\C,2
.5965789392,-2.7090970223,-0.1030586956\N,3.6574378375,-3.5673617533,-
0.1756528624\N,4.0866909926,-0.8274630145,-0.0838466009\N,5.1350480148
,-1.6884037254,-0.2471287964\C,4.8448075875,-2.9764070924,-0.279262177
9\C,4.4932448795,0.5328829326,0.052896383\C,5.6990327209,0.9495797212,
-0.5306217117\C,6.0823273881,2.2687871311,-0.3474957482\C,4.0931238791
,2.6063299069,0.9252876395\C,5.2694319626,3.124068725,0.3969566487\N,-
3.1231888101,0.0834811397,0.0019695293\N,-2.0116283006,-0.7020882204,0
.0403449378\N,-0.6112532316,1.1938157831,-0.3037498323\C,-4.1195404564
,2.3645093858,-0.0303555496\C,-1.5408259328,3.3918391932,-0.3990354285
\C,-2.6206067268,4.2502489716,-0.3335124368\C,-3.9077236566,3.73166202
17,-0.1398694237\C,-4.3340102232,-0.6610852509,0.141008739\C,-4.318016
6375,-1.8625114857,0.8648829786\C,-5.4999151467,-2.5813667229,0.951037
7807\C,-6.5530669522,-0.8870871411,-0.3563653547\C,-6.647823383,-2.093
315095,0.3262411951\H,-0.8106316652,-2.8310028051,-0.0690692221\H,1.73
16207074,0.6071066586,-0.1018797838\H,1.1950898914,-4.3171312615,-0.09
11262173\H,6.2984018477,0.2511622569,-1.0937399607\H,7.0057778169,2.62
77217965,-0.7869656296\H,3.4255370569,3.2296780051,1.5122969455\H,5.53
75069499,4.1600283139,0.5612388517\H,-2.4732822421,5.3198705695,-0.425
8067196\H,-0.5288613396,3.7532243704,-0.5331483261\H,-5.1177499091,1.9
788657335,0.0875495563\H,-3.4072676501,-2.2015796142,1.3338516031\H,-5
.5261871809,-3.5118204745,1.5061865099\H,-7.4180569913,-0.4634204843,-
0.8575579442\H,-7.5877803379,-2.6286034753,0.3697560901\H,-4.757844466
,4.4008870657,-0.0783798289\H,5.7137230481,-3.6173043909,-0.3951217079
\N,-5.4212183427,-0.1817393641,-0.4551688396\N,3.7091917102,1.33614774
07,0.7646109714\Version=ES64L-G09RevD.01\State=3-A\HF=-1362.4444304\S
2=2.035353\S2-1=0.\S2A=2.000732\RMSD=4.944e-09\RMSF=3.509e-06\Dipole=-
1.1994957,1.0127766,0.2636564\Quadrupole=18.8917006,-1.3653862,-17.526
3145,18.9637181,-7.257821,-1.682891\PG=C01 [X(C24H16N8)]\@
```

**I[3,7]H,H,2-Pyr -T, syn**

```
1\1\GINC-LOCALHOST\FOpt\UB3LYP\6-311G(d,p)\C24H16N8(3)\PIOTR\16-Jan-20
24\0\#\#P UB3LYP/6-311G(d,p) FOpt SCF=Direct Geom=(NoDistance,NoAngle)
fcheck freq #P SCRF=(solvent=Benzene)\3-(3-H-1-Pyridine-benzo[e][1,2,
4]triazinyl-7-)-1-Pyridine-benzo[e][1,2,4]triazinyl, conformer syn\
0,3\C,-1.0118552752,-1.4677862637,0.0080621574\C,-3.2137644757,-2.09095
59284,0.1390929995\C,-3.6294025673,-0.731723835,0.0309922897\C,0.42759
27921,-1.8304088205,-0.0196212784\C,0.7987610313,-3.1892092939,-0.0059
947677\C,1.4120670105,-0.8404230918,-0.053005183\C,2.1279331812,-3.543
2335846,-0.0557838801\C,2.7645742733,-1.1883007427,-0.0792979856\C,3.1
423577445,-2.566412442,-0.1125112188\N,4.4420058702,-2.9706656014,-0.2
219686789\N,3.8294138886,-0.2644507429,-0.1165105597\N,5.1175326876,-0
.679323489,-0.3083299814\C,5.3241178731,-1.9826130719,-0.3447823146\C,
3.7135188333,1.1513902485,0.0106682872\C,4.6957805796,1.9739578088,-0.
5635924036\C,4.574776969,3.3431262605,-0.3891841293\C,2.5799650639,2.9
482326889,0.8565533434\C,3.4982734191,3.8525931594,0.3380467647\N,-2.5
```

895531418, 0.212458353, -0.0578371431\N, -1.2842002579, -0.1676423335, -0.1045126903\N, -1.8968926338, -2.4558029652, 0.1463243793\C, -4.997144634, -0.4274860109, -0.0239409394\C, -4.1953836636, -3.0983427745, 0.2231827363\C, -5.5398312984, -2.7850022688, 0.181771276\C, -5.9354708162, -1.44772432, 0.0507195138\C, -2.7580392766, 1.6268405216, -0.1653108882\C, -1.7979946082, 2.3778173548, -0.8604221688\C, -1.9697909986, 3.7517880242, -0.9189636861\C, -3.967349814, 3.494611567, 0.3581042414\C, -3.0737834057, 4.3338346602, -0.295232355\H, 0.0214561652, -3.9395401621, 0.0351947439\H, 1.1178058145, 0.1927808939, -0.0195633016\H, 2.4413826995, -4.5796092142, -0.0691276353\H, 5.5153654633, 1.5370341123, -1.1121264855\H, 5.3138370696, 4.0080389768, -0.8209770061\H, 1.7237194517, 3.2910051548, 1.4294602171\H, 3.3745018125, 4.9162400034, 0.4975469064\H, -6.2847134221, -3.5693950733, 0.2461182725\H, -3.8479264782, -4.1201794327, 0.3115851644\H, -5.3164580362, 0.598088198, -0.0944551172\H, -0.9586827972, 1.8864619931, -1.3274936867\H, -1.2505327978, 4.3624368546, -1.4523375288\H, -4.8436030741, 3.8971832806, 0.8571108681\H, -3.2395166629, 5.403415937, -0.3180556644\H, -6.9886268373, -1.19555637, 0.0107446197\H, 6.3656307926, -2.2564355488, -0.4840874792\N, -3.8166616577, 2.1677668438, 0.4294036728\N, 2.6815781442, 1.6240804863, 0.7026987033\\Version=ES64L-G09RevD.01\State=3-A\HF=-1362.4445932\S2=2.03603\S2-1=0.\S2A=2.000759\RMSD=8.407e-09\RMSF=1.173e-05\Dipole=-0.8488013, 2.669067, -0.6856223\Quadrupole=3.1890714, 9.5733368, -12.7624082, 9.1103056, -2.4585244, -2.1629129\PG=C01 [X(C24H16N8)]\@

**I[3,7]H,H,2-Pyr -S, anti**

1\1\GINC-LOCALHOST\FOpt\UB3LYP\6-311G(d,p)\C24H16N8\PIOTR\17-Jan-2024\0\#\#P UB3LYP/6-311G(d,p) FOpt SCF=Direct Geom=(NoDistance,NoAngle) fcheck guess(mix,always) #P freq SCRF=(solvent=Benzene)\3-(3-H-1-Pyridine-benzo[e][1,2,4]triazinyl-7-)-1-Pyridine-benzo[e][1,2,4]triazinyl, conformer anti\0,1\C, -0.825175995, -0.1020113019, -0.1232716912\C, -1.7119407777, 2.0045536174, -0.2741686838\C, -3.029283978, 1.4861371244, -0.1092258163\C, 0.3493470954, -1.0141132208, -0.09763405\C, 0.1850050497, -2.4126517867, -0.0688675469\C, 1.6305270232, -0.4644568763, -0.1036835113\C, 1.2877277136, -3.238652948, -0.0725114352\C, 2.7557441448, -1.294615305, -0.0766763518\C, 2.5934880174, -2.7120363676, -0.0937769336\N, 3.6572645079, -3.5718191881, -0.1609521538\N, 4.0844134829, -0.8322631424, -0.079324881\N, 5.1343612991, -1.6922030967, -0.237292865\C, 4.8424966868, -2.9821040185, -0.2644791905\C, 4.4896354799, 0.5299512431, 0.0517893201\C, 5.68729142, 0.9479546575, -0.5462218187\C, 6.0699467292, 2.268323133, -0.3688864397\C, 4.0951063255, 2.6023288728, 0.9276976114\C, 5.2639012636, 3.1220964348, 0.3844522719\N, -3.1167785917, 0.0857743078, -0.0015353268\N, -2.006929811, -0.6963653987, 0.0316050381\N, -0.607244892, 1.2003966984, -0.3034447532\C, -4.1180985505, 2.364888697, -0.0204231983\C, -1.5422950565, 3.3983947756, -0.3903176793\C, -2.6246787312, 4.2538793169, -0.3192517692\C, -3.9105367637, 3.7332163489, -0.124787265\C, -4.3278319335, -0.6607163799, 0.1341408013\C, -4.3132999347, -1.8584527656, 0.8633770884\C, -5.4943294106, -2.5794262115, 0.9454262578\C, -6.5426909314, -0.8925487372, -0.3760341935\C, -6.6390504683, -2.0960868578, 0.3113230409\H, -0.813437564, -2.827389145, -0.0634001072\H, 1.7324779279, 0.6062733282, -0.1050684239\H, 1.1905353467, -4.3171521006, -0.0789016565\H, 6.281329076, 0.2498578509, -1.1154703328\H, 6.9873021073, 2.6290411277, -0.8194594336\H, 3.4335008935, 3.2246405312, 1.5224627811\H, 5.5315933358, 4.1587835834, 0.544743761\H, -2.4793310069, 5.3241652524, -0.4078137711\H, -0.5317747983, 3.7637443478, -0.5246530012\H, -5.1150227207, 1.9759405782, 0.0985382275\H, -3.4046562349, -2.1935603962, 1.3394617898\H, -5.5223855498, -3.5074875465, 1.5044284573\H, -7.4054235408, -0.4728686118, -0.8843505177\H, -7.5782479508, -2.6329741325, 0.3514112912\H, -4.7617796451, 4.4004807791, -0.0588678076\H, 5.712357517, -3.6227749187, -0.3755427382\N, -5.4116468096, -0.1853631758, -0.4707397944\N, 3.7122902037, 1.3311

380236,0.7727014007\\Version=ES64L-G09RevD.01\\State=1-A\\HF=-1362.4440582\\S2=1.00428\\S2-1=0.\\S2A=0.210615\\RMSD=9.072e-09\\RMSF=3.659e-06\\Dipole=-1.2123485,0.9985051,0.2670575\\Quadrupole=19.413008,-1.8201208,-17.5928873,19.628793,-7.4438748,-1.6509069\\PG=C01 [X(C24H16N8)]\\@

**I[3,7]H,H,2-Pyr -S, syn**

1\\1\\GINC-LOCALHOST\\FOpt\\UB3LYP\\6-311G(d,p)\\C24H16N8\\PIOTR\\17-Jan-2024\\0\\#P UB3LYP/6-311G(d,p) FOpt SCF=Direct Geom=(NoDistance,NoAngle) fcheck guess(mix,always) #P freq SCRF=(solvent=Benzene)\\3-(3-H-1-Pyridine-benzo[e][1,2,4]triazinyl-7)-1-Pyridine-benzo[e][1,2,4]triazinyl, conformer syn\\0,1\\C,-1.0123778876,-1.4682042725,0.0070993007\\C,-3.2127369574,-2.0877504116,0.1538440084\\C,-3.6275082056,-0.7291407,0.0331089\\C,0.4307169672,-1.8332870538,-0.0258011684\\C,0.8015927294,-3.1909395879,-0.0226868235\\C,1.4131877082,-0.8433555714,-0.0529385038\\C,2.1322586427,-3.5439674257,-0.076787105\\C,2.767317253,-1.1914537233,-0.0826802985\\C,3.1445617139,-2.5670933376,-0.1263637779\\N,4.4489169522,-2.9691991675,-0.241135586\\N,3.8292359482,-0.2652460286,-0.1156327527\\N,5.1173487874,-0.6746618852,-0.3158046267\\C,5.3258198027,-1.9803032333,-0.3609976238\\C,3.70919843,1.1493091753,0.0241271672\\C,4.6800445739,1.9796827028,-0.5575027773\\C,4.5563527828,3.3470984007,-0.370747317\\C,2.5809357281,2.9343566955,0.9004630138\\C,3.4883106283,3.846324073,0.3756732988\\N,-2.5871649462,0.2124656459,-0.0665632531\\N,-1.2825176052,-0.1700144163,-0.1171779591\\N,-1.8958619055,-2.4531626155,0.1608776335\\C,-4.9952622624,-0.4236117601,-0.0226955055\\C,-4.1953733439,-3.0927769061,0.2509908736\\C,-5.5394953991,-2.7779937151,0.2092724785\\C,-5.9343491896,-1.4417030215,0.0646276041\\C,-2.7543593548,1.6264564009,-0.1813739715\\C,-1.7968525573,2.372189699,-0.8854304511\\C,-1.9673086837,3.7460656258,-0.9506673056\\C,-3.9587715159,3.4982886111,0.3380273846\\C,-3.0674083723,4.3327755592,-0.3244766784\\H,0.0249666504,-3.9422166379,0.0141988114\\H,1.1186029942,0.1896543539,-0.0132916943\\H,2.445625581,-4.5802502671,-0.0989242827\\H,5.4933614104,1.5497826414,-1.1208388035\\H,5.2865755279,4.0183687845,-0.8076807729\\H,1.731943318,3.269419755,1.4884912804\\H,3.3627069681,4.9081769091,0.5453802051\\H,-6.2851221003,-3.5608174031,0.2835837021\\H,-3.8491842932,-4.11412665,0.3492749879\\H,-5.3134967834,0.601532404,-0.1038196596\\H,-0.9606064052,1.8770283742,-1.3539927273\\H,-1.2500326843,4.3529744825,-1.4909069997\\H,-4.831879284,3.904711406,0.8394053514\\H,-3.2319099087,5.4024302995,-0.352250983\\H,-6.9873500333,-1.189059591,0.0239646317\\H,6.3679658182,-2.2493964858,-0.5057784445\\N,-3.8093864871,2.1717277549,0.4158077791\\N,2.6855392499,1.6118721135,0.7350844402\\Version=ES64L-G09RevD.01\\State=1-A\\HF=-1362.4434538\\S2=1.02749\\S2-1=0.\\S2A=0.223173\\RMSD=9.068e-09\\RMSF=7.556e-06\\Dipole=-0.8769285,2.7266679,-0.6914541\\Quadrupole=3.0102529,9.5634381,-12.5736909,9.2825913,-2.4223897,-2.1783337\\PG=C01 [X(C24H16N8)]\\@

**I[3,7]H,H,4-Me2NPh -T, anti**

1\\1\\GINC-LOCALHOST\\FOpt\\UB3LYP\\6-311G(d,p)\\C30H28N8(3)\\PIOTR\\17-Jan-2024\\0\\#P UB3LYP/6-311G(d,p) FOpt SCF=Direct Geom=(NoDistance,NoAngle) fcheck freq #P SCRF=(solvent=Benzene)\\3-(3-H-1-Ph-benzo[e][1,2,4]triazinyl-7)-1-Ph-benzo[e][1,2,4]triazinyl, conformer anti\\0,3\\C,-0.841059632,-0.0906546249,0.0598892078\\C,-1.6939000318,2.0395354006,-0.0309068592\\C,-3.0137442578,1.5220899491,0.1004209772\\C,0.3272978169,-1.0068159157,0.0918136845\\C,0.1576014523,-2.3991517357,0.224643269\\C,1.6162553392,-0.4793090965,-0.0174479474\\C,1.2512153442,-3.2401710662,0.2253886237\\C,2.7286691299,-1.3222083495,0.0155291567\\C,2.5604378341,-2.7354154244,0.1044045268\\N,3.6214100905,-3.5971621912,0.0418669857\\N,4.0486375845,-0.8621211984,-0.0622761208\\N,5.0977110996,-1.7250641567,-0.21

90273982\C, 4.8018600619, -3.013133542, -0.1573457824\C, 4.4126929906, 0.5189542181, -0.0549567745\C, 5.2773702381, 1.0110253039, -1.0338428325\C, 3.9661601703, 1.3834959526, 0.9456315557\C, 5.6777247481, 2.3371208864, -1.0256894282\C, 4.358207624, 2.7138420794, 0.959202508\C, 5.2342662065, 3.2318318506, -0.0230250589\N, -3.1273131318, 0.1331319532, 0.1168982198\N, -2.0358194956, -0.680768837, 0.155764656\N, -0.6015991789, 1.2167501243, -0.0744267116\C, -4.1044253607, 2.3929067607, 0.2284206692\C, -1.5241532298, 3.4354049799, -0.0888492061\C, -2.6105857255, 4.288888478, 0.008439143\C, -3.8986112546, 3.7659394362, 0.1787308088\C, -4.3820868523, -0.5541723816, 0.1477370332\C, -4.6369424788, -1.4936914112, 1.1467587759\C, -5.3441771298, -0.3389096477, -0.8391215429\C, -5.8307753736, -2.1967757686, 1.1702044164\C, -6.5452297169, -1.032614137, -0.8210354575\C, -6.8230644023, -1.9920024741, 0.1814359609\H, -0.8433756021, -2.7995595315, 0.3090932761\H, 1.7278113988, 0.5881998381, -0.1307438585\H, 1.1389174959, -4.3148268187, 0.3012241885\H, 5.6401510322, 0.341121615, -1.8027159599\H, 3.3145601786, 1.0166017555, 1.729033592\H, 6.3387689757, 2.6778770013, -1.8097902483\H, 3.9865556102, 3.3486581439, 1.7507462003\H, -2.463228512, 5.3616491816, -0.0356719012\H, -0.5138222464, 3.8098800228, -0.1991346158\H, -5.1001576022, 1.9963422572, 0.3689156048\H, -3.8881813777, -1.6746261628, 1.9077100959\H, -5.1512513558, 0.3677110475, -1.637490624\H, -5.9912387117, -2.9099696934, 1.9661544499\H, -7.2629568804, -0.836507692, -1.6047855303\H, -4.7469722726, 4.4329714295, 0.2771481675\H, 5.6638088193, -3.6636254169, -0.2756511427\N, -8.0028240797, -2.7034919254, 0.1884041023\N, 5.6481916681, 4.5481633938, 0.0024021091\C, -8.3108717079, -3.591903104, 1.2983440217\H, -8.3920348714, -3.0568637159, 2.2543083365\H, -9.261080331, -4.0861284567, 1.104480786\H, -7.5490732488, -4.3702870774, 1.4082563375\C, -9.0528157706, -2.3803197571, -0.7648365717\H, -9.8853729162, -3.06684247, -0.6228697775\H, -9.4291360544, -1.3554967144, -0.6425567715\H, -8.7031145526, -2.4927764532, -1.7961318393\C, 6.4122270353, 5.0880497289, -1.1115054484\H, 6.6756747928, 6.1215484227, -0.8931865474\H, 7.3444283534, 4.5340141678, -1.2574296789\H, 5.8522327574, 5.068275664, -2.0569087986\C, 5.045826619, 5.4780833167, 0.944968029\H, 5.521558879, 6.4511956623, 0.8360729837\H, 3.9659624362, 5.6025320486, 0.7831712041\H, 5.1986725431, 5.1499507476, 1.9776226311\\Version=ES64L-G09RevD.01\State=3-A\HF=-1598.3617908\S2=2.029867\S2-1=0.\S2A=2.000513\RMSD=8.442e-09\RMSF=2.587e-06\Dipole=-2.8403594, 2.0719009, 0.0991181\Quadrupole=27.0734841, -4.4922116, -22.5812725, 40.6686711, -3.9630542, -3.034486\PG=C01 [X(C30H28N8)]\@

**I [3, 7]H, H, 4-Me2NPh -T, syn**

1\1\GINC-LOCALHOST\FOpt\UB3LYP\6-311G(d,p)\C30H28N8(3)\PIOTR\18-Jan-2024\0\#\#P UB3LYP/6-311G(d,p) FOpt SCF=Direct Geom=(NoDistance,NoAngle) fcheck freq #P SCRF=(solvent=Benzene)\3-(3-H-1-Ph-benzo[e][1,2,4]triazinyl-7)-1-Ph-benzo[e][1,2,4]triazinyl, conformer syn\0,3\C, -0.9399662373, -1.5520210244, 0.0396458322\C, -3.1532611848, -2.1614384929, -0.0184332013\C, -3.5314461285, -0.7961701605, -0.1560902832\C, 0.4942548771, -1.9302692089, 0.0910106206\C, 0.8536344821, -3.2880562948, 0.1863500142\C, 1.4957908469, -0.9555023433, 0.0420189482\C, 2.181857199, -3.6621193541, 0.2067551138\C, 2.8407649211, -1.3243914097, 0.0984162977\C, 3.2101930253, -2.7025809195, 0.1468225534\N, 4.5168772454, -3.1035106219, 0.1050332411\N, 3.8960600868, -0.4045983384, 0.0865876438\N, 5.1954236258, -0.8088257876, -0.0465043049\C, 5.3998178693, -2.1155597204, -0.0301875718\C, 3.7195321628, 1.0114358585, 0.1458142328\C, 4.3948192949, 1.8316631559, -0.7593104308\C, 2.9379893468, 1.6055473044, 1.1381787493\C, 4.274093515, 3.2105376265, -0.6942609665\C, 2.8065493287, 2.98428433, 1.2061721019\C, 3.4582170882, 3.8316175742, 0.2804488079\N, -2.494193352, 0.1349893686, -0.0937580139\N, -1.1871696085, -0.2419147004, -0.0525403868\N, -1.8425709252, -2.5347963692, 0.1037698742\C, -4.8734805764, -0.4524654221, -0.3659278363\C, -4.1627150734, -3.

141685497,-0.0384191294\C,-5.4908587065,-2.7915406188,-0.2166915155\C,  
-5.8430092554,-1.4475573653,-0.3916591014\C,-2.7059886148,1.5498380499  
, -0.1303161754\C,-2.0531016432,2.3272757744,-1.0866532452\C,-3.5263757  
411,2.1783364265,0.8063830215\C,-2.2266931164,3.7017906594,-1.12057025  
39\C,-3.7106849029,3.5531293886,0.7775547024\C,-3.0604894967,4.3602074  
195,-0.1854095795\H,0.0665000798,-4.0280792839,0.2297085123\H,1.211819  
979,0.0823645318,-0.0387664578\H,2.4765285708,-4.7033776212,0.25403405  
44\H,5.031430497,1.3787990028,-1.5082604764\H,2.4399634281,0.99082782,  
1.877623719\H,4.8198581915,3.8064114893,-1.4118967054\H,2.1990298932,3  
.3999931374,1.9969503107\H,-6.2562983475,-3.5585371466,-0.2324872376\H  
, -3.8567098038,-4.1743475896,0.0770434952\H,-5.1519396959,0.5818091388  
, -0.5116911434\H,-1.4029230387,1.8465971803,-1.8066390144\H,-4.0210067  
596,1.5921852279,1.5716356738\H,-1.7102240904,4.2649950917,-1.88465748  
77\H,-4.3562136834,3.9992606517,1.5206136626\H,-6.879101181,-1.1740623  
261,-0.5529736866\H,6.4452011982,-2.3939526936,-0.1286788253\N,-3.2232  
520774,5.7304440942,-0.2050036831\N,3.302304209,5.204084058,0.32412966  
89\C,-2.6850298041,6.5067975764,-1.311830268\H,-3.1302137526,6.2297339  
077,-2.2775174775\H,-2.8849403724,7.5621544273,-1.1348157477\H,-1.6006  
050072,6.3848622455,-1.3905018431\C,-4.2154048608,6.3525942553,0.65831  
49418\H,-4.179884754,7.4317026457,0.5195648436\H,-5.237199076,6.011433  
8153,0.4409711233\H,-4.0064519273,6.1489850524,1.712917006\C,2.6219370  
02,5.8156648034,1.4556979939\H,2.5501976131,6.8891335555,1.2873480323\  
H,1.6040509711,5.4290455925,1.5570648088\H,3.1470072142,5.65095298,2.4  
074258808\C,4.1512319033,6.0515157811,-0.4995067878\H,3.8500377296,7.0  
895581574,-0.3674023587\H,5.216127959,5.9657498684,-0.2405346937\H,4.0  
388335514,5.8091374159,-1.5599871026\\Version=ES64L-G09RevD.01\State=3  
-A\HF=-1598.3619894\S2=2.030234\S2-1=0.\S2A=2.000524\RMSD=8.197e-09\RM  
SF=1.392e-06\Dipole=-2.133571,4.8470253,-0.0824306\Quadrupole=-4.14389  
44,13.3863953,-9.2425009,8.5692114,-4.3239665,-0.0524203\PG=C01 [X(C30  
H28N8)]\@

**I[3,7]H,H,4-Me2NPh -S, anti**

1\1\GINC-LOCALHOST\FOpt\UB3LYP\6-311G(d,p)\C30H28N8\PIOTR\20-Jan-2024\  
0\#\#P UB3LYP/6-311G(d,p) FOpt SCF=Direct Geom=(NoDistance,NoAngle) fch  
eck guess(mix,always) #P freq SCRF=(solvent=Benzene)\3-(3-H-1-Ph-benz  
o[e][1,2,4]triazinyl-7-)-1-Ph-benzo[e][1,2,4]triazinyl, conformer anti  
\0,1\C,-0.8410315891,-0.0778655301,0.0443180342\C,-1.6955060479,2.050  
0768401,-0.0499539818\C,-3.0142011874,1.5319506985,0.0860722954\C,0.32  
21192222,-1.0008354336,0.0781348621\C,0.1471021562,-2.392066478,0.2055  
290799\C,1.6115618336,-0.4752173421,-0.0248762681\C,1.2397517316,-3.23  
63414304,0.2082137527\C,2.7228103466,-1.3217857291,0.0095325774\C,2.54  
94552724,-2.7351505641,0.09456495\N,3.6113433784,-3.5986469608,0.03578  
19159\N,4.0413819278,-0.8647947367,-0.0627655915\N,5.0916362359,-1.727  
9708693,-0.2127640028\C,4.7923395313,-3.016675317,-0.1545364721\C,4.40  
75413205,0.5162422887,-0.0522189711\C,5.2735236037,1.0084468991,-1.029  
7457611\C,3.9619893088,1.3789176842,0.9502393057\C,5.6754695803,2.3339  
513614,-1.0190541222\C,4.3561158141,2.7085093746,0.9668042299\C,5.2327  
51366,3.2272767084,-0.0146538743\N,-3.1243444528,0.1393863919,0.106455  
3515\N,-2.0341096444,-0.668251193,0.1420895879\N,-0.6014729248,1.22898  
38938,-0.0933579373\C,-4.1070202615,2.3981304862,0.2160342537\C,-1.531  
1257099,3.4461823884,-0.1121797999\C,-2.6205085044,4.296714468,-0.0135  
096471\C,-3.9065716739,3.7724397602,0.1623908291\C,-4.3782258837,-0.55  
00002033,0.1439345615\C,-4.6263552151,-1.4889903648,1.145067201\C,-5.3  
449952328,-0.3374131769,-0.838959072\C,-5.8184522777,-2.1946905228,1.1  
744001478\C,-6.5440373487,-1.0341921323,-0.8151875325\C,-6.8154191336,  
-1.9931538846,0.1896158846\H,-0.8551542571,-2.7900638638,0.2843445388\  
H,1.725001003,0.5923725509,-0.1354408189\H,1.1240421122,-4.3108804434,

0.2804624431\H, 5.6357163742, 0.3393700465, -1.7996140642\H, 3.3095969416, 1.0111709965, 1.7325771091\H, 6.3372537252, 2.6754635859, -1.802184343\H, 3.9855003983, 3.3422820731, 1.7596445515\H, -2.4754549532, 5.3697527618, -0.0610172797\H, -0.5225963427, 3.824346704, -0.2263415867\H, -5.1008125369, 1.9982279471, 0.361029778\H, -3.874044001, -1.6672604131, 1.9031512057\H, -5.1571492872, 0.3689250454, -1.6387331126\H, -5.9739218753, -2.907319675, 1.9718167201\H, -7.2655097785, -0.8407132712, -1.5961343705\H, -4.756416067, 4.4372865486, 0.2618110045\H, 5.6545836941, -3.6678689822, -0.267579078\N, -7.9934676483, -2.7068283056, 0.202624085\N, 5.6476268902, 4.5428048286, 0.0129387612\C, -8.293543239, -3.5974623762, 1.3130196275\H, -8.3695524483, -3.0637669951, 2.2700810242\H, -9.2443722966, -4.0924424518, 1.1243346561\H, -7.530109166, -4.3750915368, 1.4172896382\C, -9.0469213971, -2.3898756336, -0.7489432789\H, -9.8776455047, -3.0774644209, -0.6016813556\H, -9.4249502806, -1.3654190117, -0.6294948917\H, -8.7000482753, -2.5056446383, -1.780871244\C, 6.4165110277, 5.0830935376, -1.0974564737\H, 6.6784815004, 6.1166863679, -0.8779867355\H, 7.3495386589, 4.5293550472, -1.2397232038\H, 5.8603420484, 5.0632635326, -2.0450042345\C, 5.0507479577, 5.4707999473, 0.9609213649\H, 5.5269228427, 6.4437037771, 0.8524200617\H, 3.9704135327, 5.5967569731, 0.8041430654\H, 5.207746086, 5.1396482427, 1.9920565099\Version=ES64L-G09RevD.01\State=1-A\HF=-1598.3619791\S2=0.986302\S2-1=0.\S2A=0.181238\RMSD=7.858e-09\RMSF=3.612e-06\Dipole=-2.8219618, 2.0314957, 0.1150248\Quadrupole=27.7018811, -4.9169126, -22.7849685, 41.3329085, -3.9903274, -3.0149118\PG=C01 [X(C30H28N8)]\@

**I[3,7]H,H,4-Me2NPh -S, syn**

1\1\GINC-LOCALHOST\FOpt\UB3LYP\6-311G(d,p)\C30H28N8\PIOTR\20-Jan-2024\0\#\P UB3LYP/6-311G(d,p) FOpt SCF=Direct Geom=(NoDistance,NoAngle) fcheck guess(mix,always) #P freq SCRF=(solvent=Benzene)\3-(3-H-1-PhNMe2-benzo[e][1,2,4]triazinyl-7-)-1-PhNMe2-benzo[e][1,2,4]triazinyl, conformer syn\0,1\C, -0.9418038902, -1.5531329979, 0.0420234583\C, -3.1544086788, -2.1607060283, -0.0031255744\C, -3.5321303873, -0.7958798931, -0.147985589\C, 0.4959449522, -1.9329628115, 0.088147894\C, 0.8562590163, -3.2896957935, 0.1807075784\C, 1.4951080709, -0.9576786624, 0.0368467763\C, 2.1861750881, -3.662011103, 0.1954680968\C, 2.8419393449, -1.3255706199, 0.088803581\C, 3.2118982203, -2.7019125287, 0.1338712163\N, 4.5226073961, -3.1013775331, 0.0860574442\N, 3.8945199201, -0.4030339962, 0.0734956746\N, 5.1940115567, -0.8041060675, -0.0688141375\C, 5.4002230767, -2.1128228731, -0.0542277572\C, 3.7156804602, 1.0120948561, 0.1402847485\C, 4.3897547865, 1.8380076796, -0.7608026449\C, 2.9339530163, 1.6001873662, 1.1362402203\C, 4.2668781254, 3.2162376972, -0.688818804\C, 2.8006548424, 2.9783669165, 1.211249509\C, 3.4505118243, 3.8312767949, 0.2893981748\N, -2.4937440041, 0.1343837093, -0.0930184409\N, -1.1870607854, -0.2443122144, -0.0564067641\N, -1.8435115399, -2.5340316079, 0.1171130659\C, -4.8743753933, -0.4520248412, -0.3575467198\C, -4.1650476754, -3.1397656062, -0.0140549645\C, -5.4932644281, -2.7891912057, -0.1912859253\C, -5.8448878944, -1.4460924457, -0.3745577567\C, -2.7034248431, 1.5491669088, -0.1332073695\C, -2.0441737283, 2.3238677814, -1.0875756451\C, -3.5275256042, 2.180798188, 0.798311054\C, -2.215697402, 3.6984488283, -1.1250893399\C, -3.7093665998, 3.5557530514, 0.7659692177\C, -3.0533272351, 4.3599690497, -0.1954926033\H, 0.0703043546, -4.0308425333, 0.226129111\H, 1.2100079021, 0.0799648514, -0.0432316952\H, 2.4819566913, -4.7031176947, 0.2396186992\H, 5.0267826542, 1.3897110466, -1.5120816991\H, 2.4379406333, 0.9812098572, 1.8734639349\H, 4.8114149493, 3.8165280009, -1.4036999191\H, 2.1934320175, 3.3892474692, 2.0047546391\H, -6.2594585491, -3.5555700853, -0.2001247964\H, -3.8600405272, -4.1720543703, 0.1071350524\H, -5.15198142, 0.5814996378, -0.5100106034\H, -1.3909958666, 1.8407537934, -1.8031384468\H, -4.0265767826, 1.5971067429, 1.5625193002\H, -1.6946018613, 4.259394398, -1.8876776734\H, -4.3576725709, 4.0043647554, 1.5050965588\H, -6.8

81060482, -1.1728196119, -0.5355915749\H, 6.4460869855, -2.3876904575, -0.1590867566\N, -3.2142667059, 5.7302093464, -0.2188943246\N, 3.2927604579, 5.203218698, 0.3400517576\C, -2.6686355633, 6.503757527, -1.3241020703\H, -3.1086855785, 6.2253811023, -2.2917343664\H, -2.868226582, 7.5596874524, -1.1502430492\H, -1.5839430682, 6.3802449462, -1.3962961639\C, -4.2094636939, 6.3556896944, 0.6385545175\H, -4.1717315753, 7.4344347002, 0.4976384553\H, -5.2306787447, 6.015496338, 0.4171385964\H, -4.0056807314, 6.1540483954, 1.6945450085\C, 2.6111833414, 5.808234293, 1.4744325404\H, 2.5377201765, 6.8823780354, 1.3112290936\H, 1.5939117436, 5.4194653858, 1.5737388324\H, 3.1363914627, 5.6397948083, 2.4254152016\C, 4.1400113467, 6.0559998073, -0.4798276045\H, 3.8378034614, 7.0929819446, -0.3418962434\H, 5.2051894673, 5.9700105011, -0.2221908973\H, 4.0269651599, 5.8191172834, -1.5414885987\Version=ES64L-G09RevD.01\State=1-A\HF=-1598.3610103\S2=1.024154\S2-1=0.\S2A=0.199371\RMSD=9.016e-09\RMSF=7.750e-06\Dipole=-2.1623602, 4.9021932, -0.0774809\Quadrupole=-4.2254095, 13.3057867, -9.0803771, 8.7318832, -4.2294752, -0.0633255\PG=C01 [X(C30H28N8)]\@

## 9. References

1. G. R. Fulmer, A. J. M. Miller, N. H. Sherden, H. E. Gottlieb, A. Nudelman, B. M. Stoltz, J. E. Bercaw and K. I. Goldberg, *Organometallics*, 2010, **29**, 2176–2179.
2. M. Kikuchi, R. Kurotani and H. Konno, *Tetrahedron Lett.*, 2017, **58**, 4145–4148.
3. H. Hopff and G. Valkanas, *J. Org. Chem.*, 1962, **27**, 2923–2924.
4. B. Li, R. J. Bemish, D. R. Bill, S. Brenek, R. A. Buzon, C. K.-F. Chiu, L. Newell, C. Coleman and P. A. Wipf, *Org. Synth.*, 2005, **81**, 254–261.
5. K. Ohkata, Y. Tamura, B. B. Shetuni, R. Takagi, W. Miyanaga, S. Kojima and L. A. Paquette, *J. Am. Chem. Soc.*, 2004, **126**, 16783–16792.
6. X. Zhan, Y. Liu, X. Wu, S. Wang and D. Zhu, *Macromolecules*, 2002, **35**, 2529–2537.
7. C. P. RigakuOD, Rigaku Oxford Diffraction Ltd, 2018, Yarnton, Oxfordshire, England.
8. G. M. Sheldrick, *Acta Cryst., Sect.*, 2015, **A71**, 3-8.
9. G. M. Sheldrick, *Acta Cryst., Sect.*, 2015, **C71**, 3-8.
10. B. Bleaney and K. D. Bowers, *Proc. R. Soc. London, Ser. A.*, 1952, **214**, 451–465.
11. S. Stoll and A. Schweiger, *J. Magn. Reson.*, 2006, **178**, 42–55.
12. Gaussian 09, Revision A.02, M. J. Frisch, G. W. Trucks, H. B. Schlegel, G. E. Scuseria, M. A. *et al.* Gaussian, Inc., Wallingford CT, 2009.
13. M. Cossi, G. Scalmani, N. Rega and V. Barone, *J. Chem. Phys.*, 2002, **117**, 43–54.
14. a) K. Yamaguchi, Y. Takahara, T. Fueno and K. Nasu, *Jpn. J. Appl. Phys.*, 1987, **26**, L1362–L1364; b) K. Yamaguchi, F. Jensen, A. Dorigo and K. N. Houk, *Chem. Phys. Lett.*, 1988, **149**, 537–542; c) K. Yamaguchi, *Chem. Phys. Lett.*, 1975, **33**, 330–335.
15. R. E. Stratmann, G. E. Scuseria and M. J. Frisch, *J. Chem. Phys.*, 1998, **109**, 8218–8224.
16. M. Cossi, G. Scalmani, N. Rega and V. Barone, *J. Chem. Phys.*, 2002, **117**, 43-54, and references therein.
